# Supplementary material
Source: PubMed Central journal article supplement (PMC8278291)
Supplement: NIHMS1559186-supplement-Supporting_information.pdf [file NIHMS1559186-supplement-Supporting_information.pdf]

Supporting Information  
for DOI: 10.1055/s-0036-1588170  
© Georg Thieme Verlag KG Stuttgart · New York 2017

## Supporting Information

### Phosphite-mediated Reductive Cross-Coupling of Isatins and Nitrostyrenes

Somayeh Motevalli, Jeffrey S. Johnson\*

†Department of Chemistry, University of North Carolina at Chapel Hill, Chapel Hill, North Carolina 27599-3290, United States

[jsi@unc.edu](mailto:jsi@unc.edu)

| <b>Table of Contents</b>                                      | <b>Page</b> |
|---------------------------------------------------------------|-------------|
| Crude $^1\text{H}$ NMR spectra                                | S2          |
| $^1\text{H}$ and $^{13}\text{C}$ NMR spectra of new compounds | S22         |
| HPLC traces                                                   | S86         |

## Crude $^1\text{H}$ NMR spectra for the racemic reactions

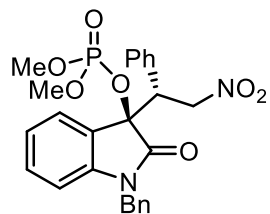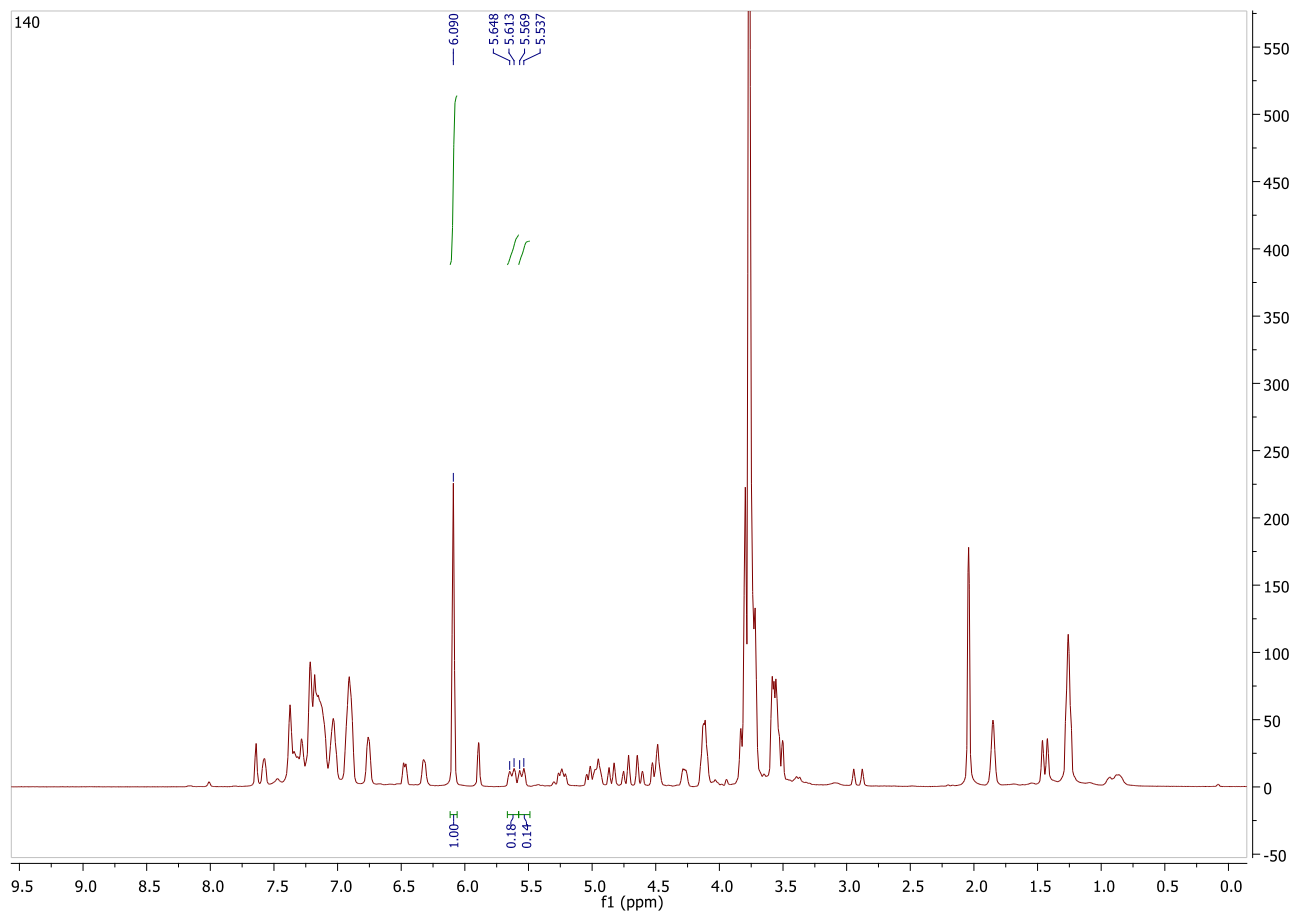

$^1\text{H}$  NMR of 4aa

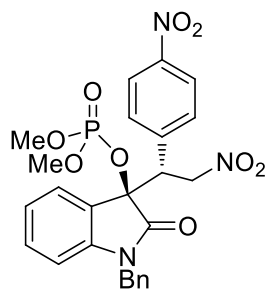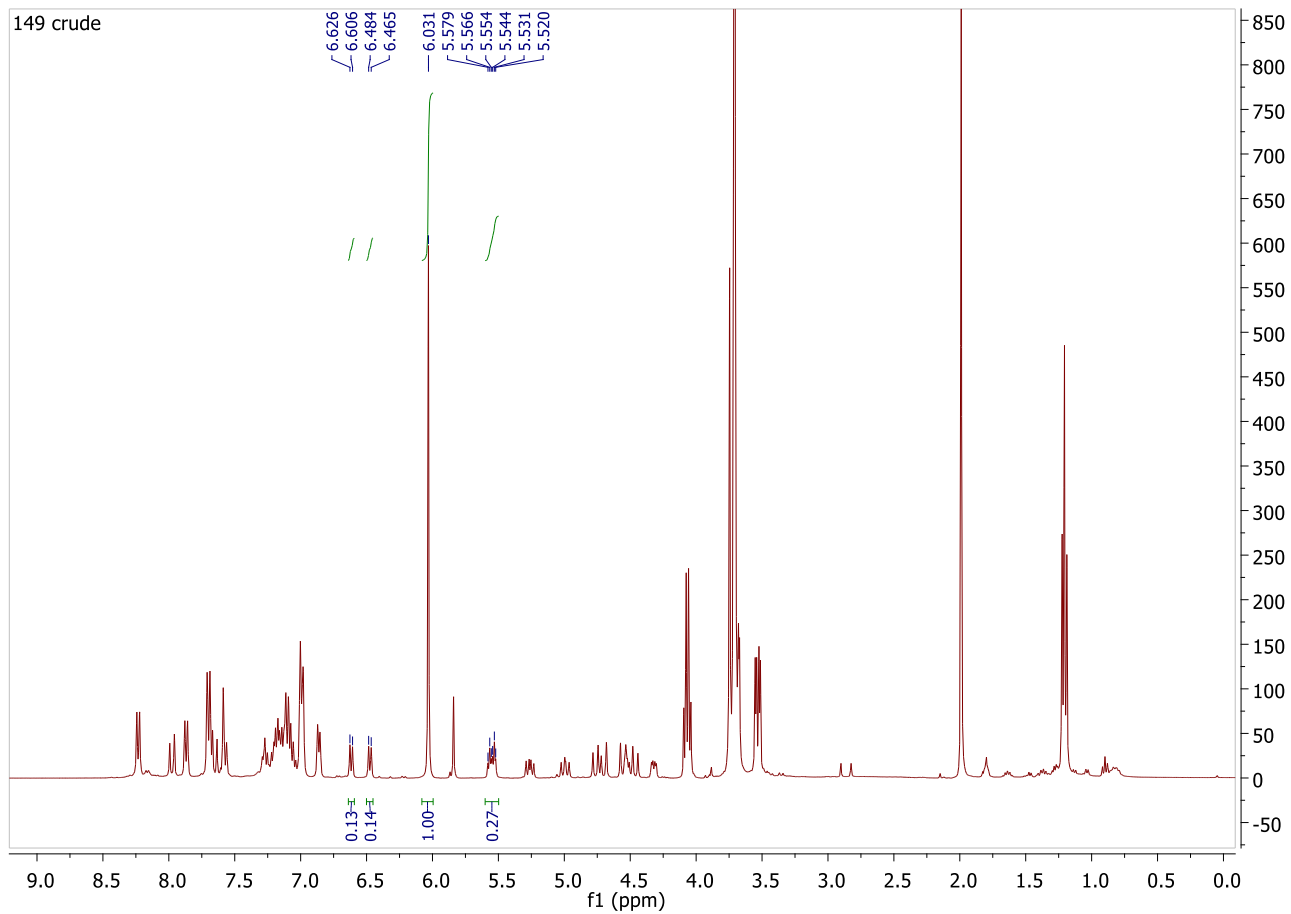

**<sup>1</sup>H NMR of 4ab**

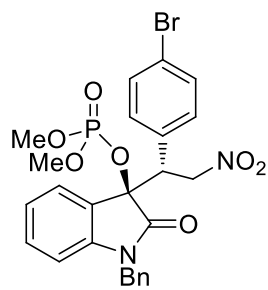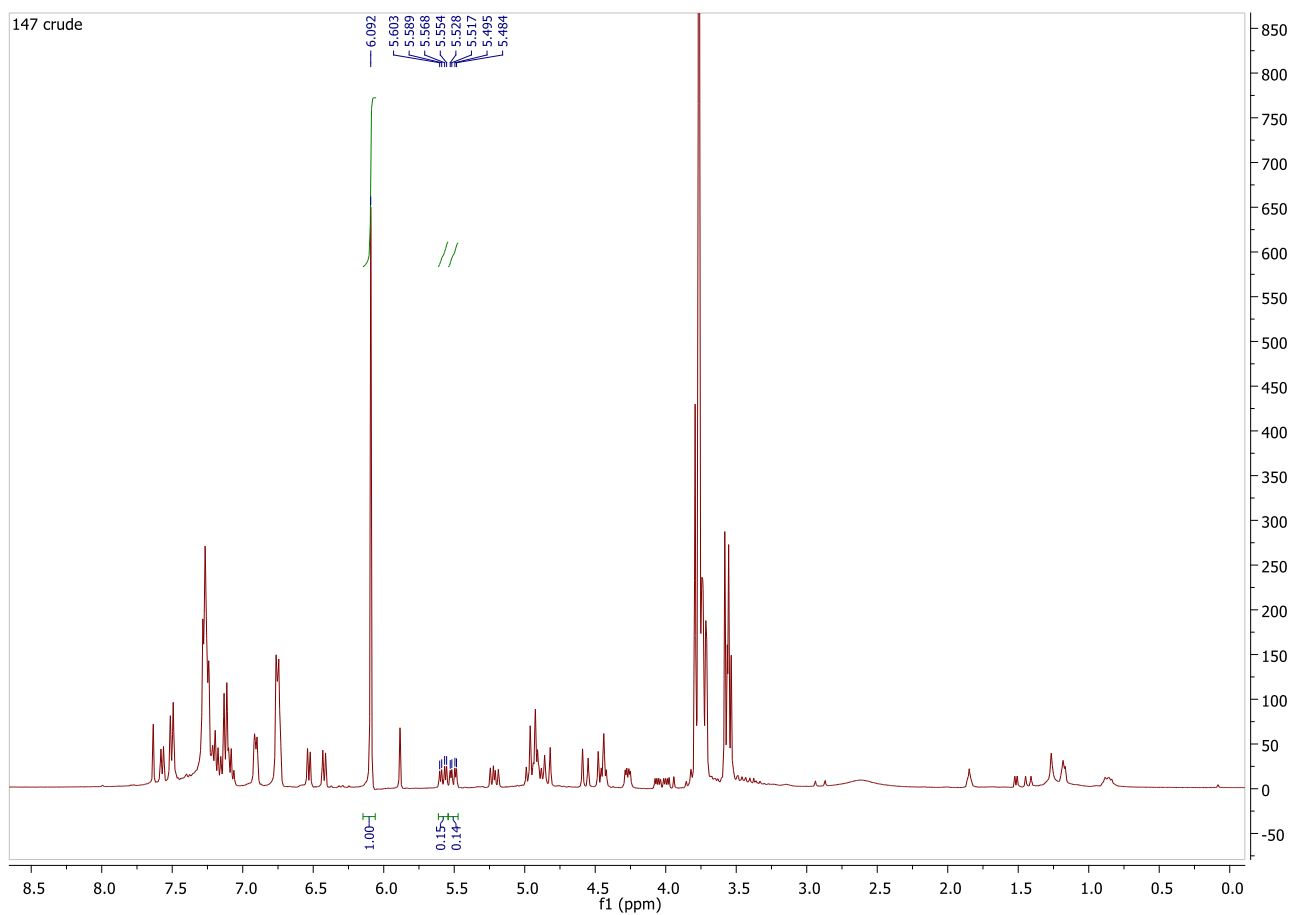

<sup>1</sup>H NMR of 4ac

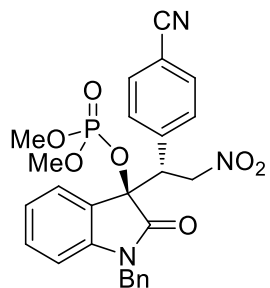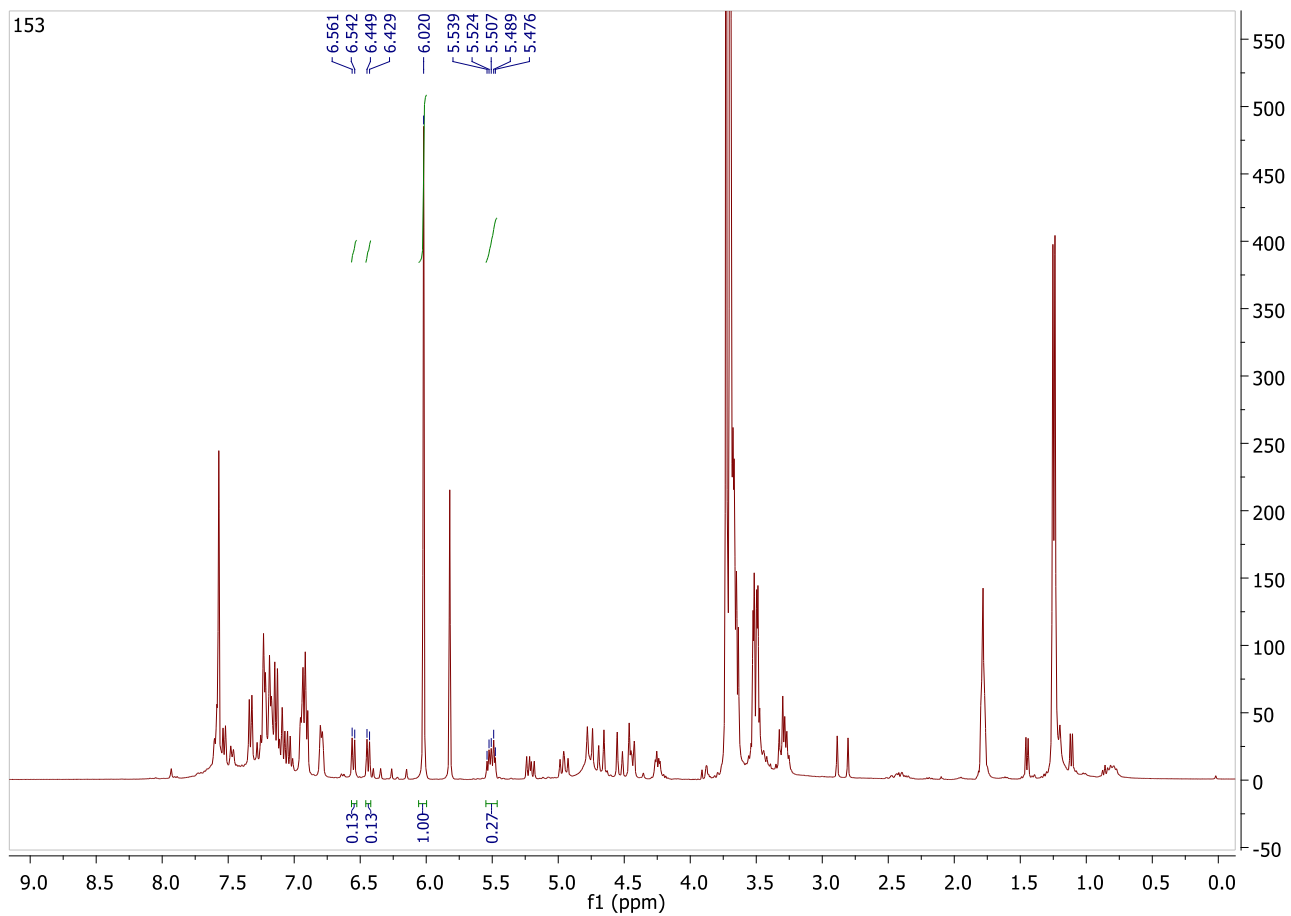

<sup>1</sup>H NMR of 4ad

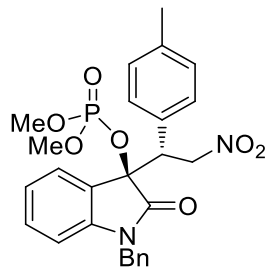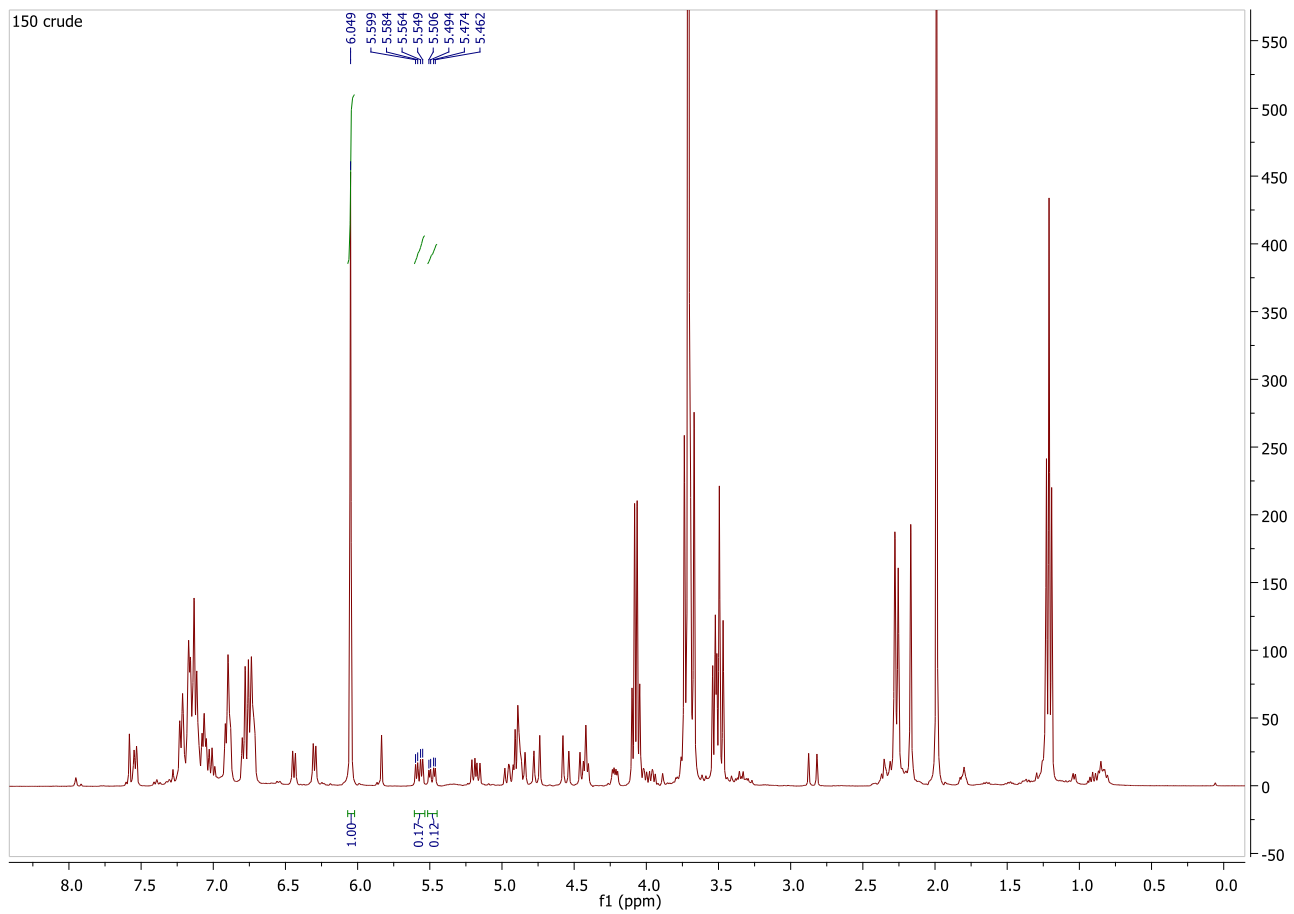

**<sup>1</sup>H NMR of 4ae**

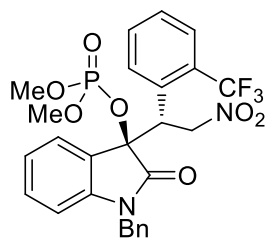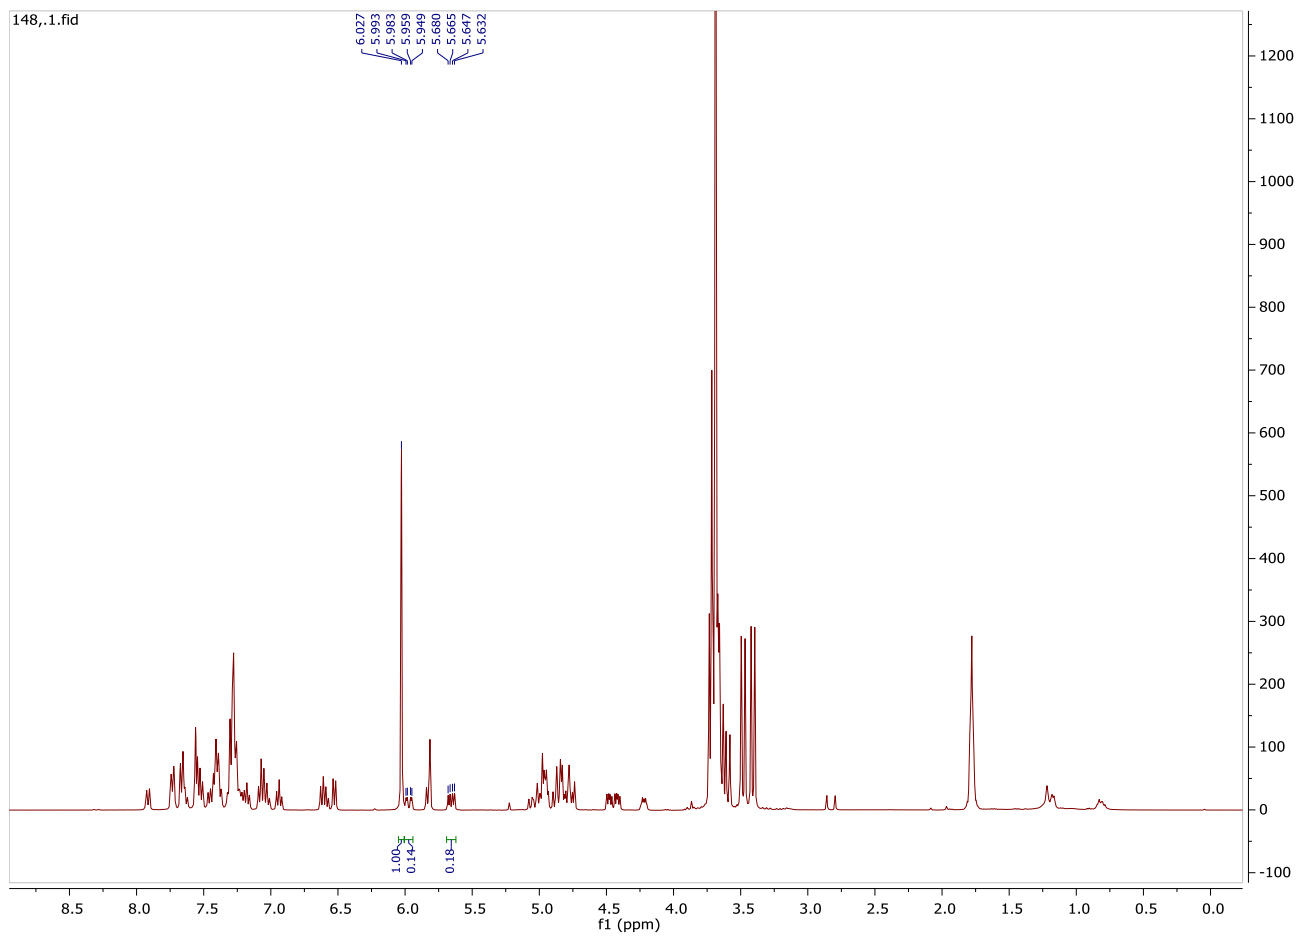

**<sup>1</sup>H NMR of 4af**



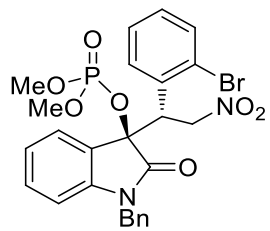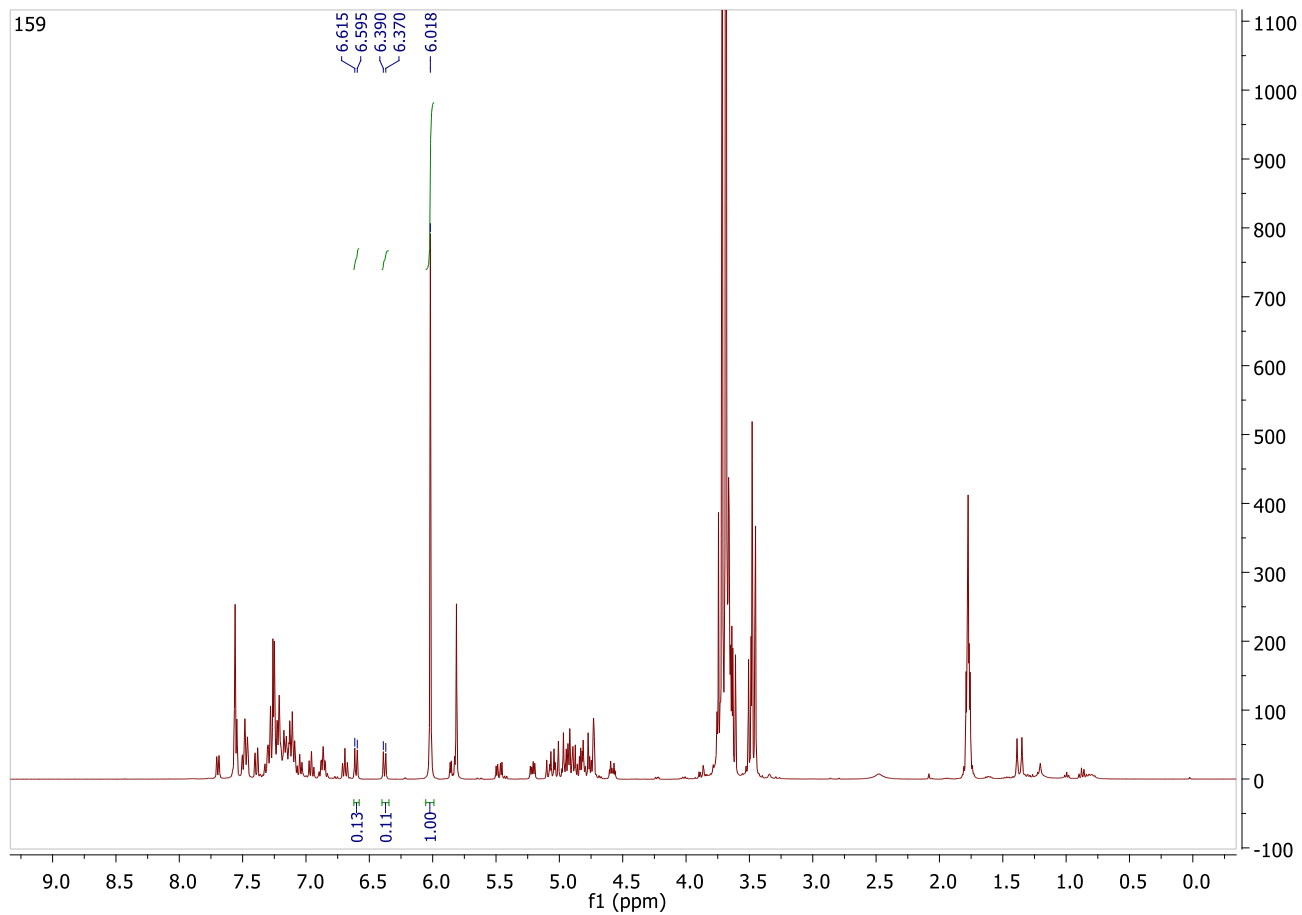

**<sup>1</sup>H NMR of 4ag**

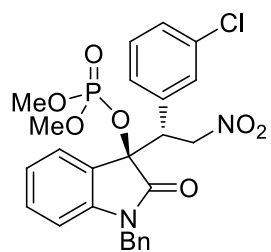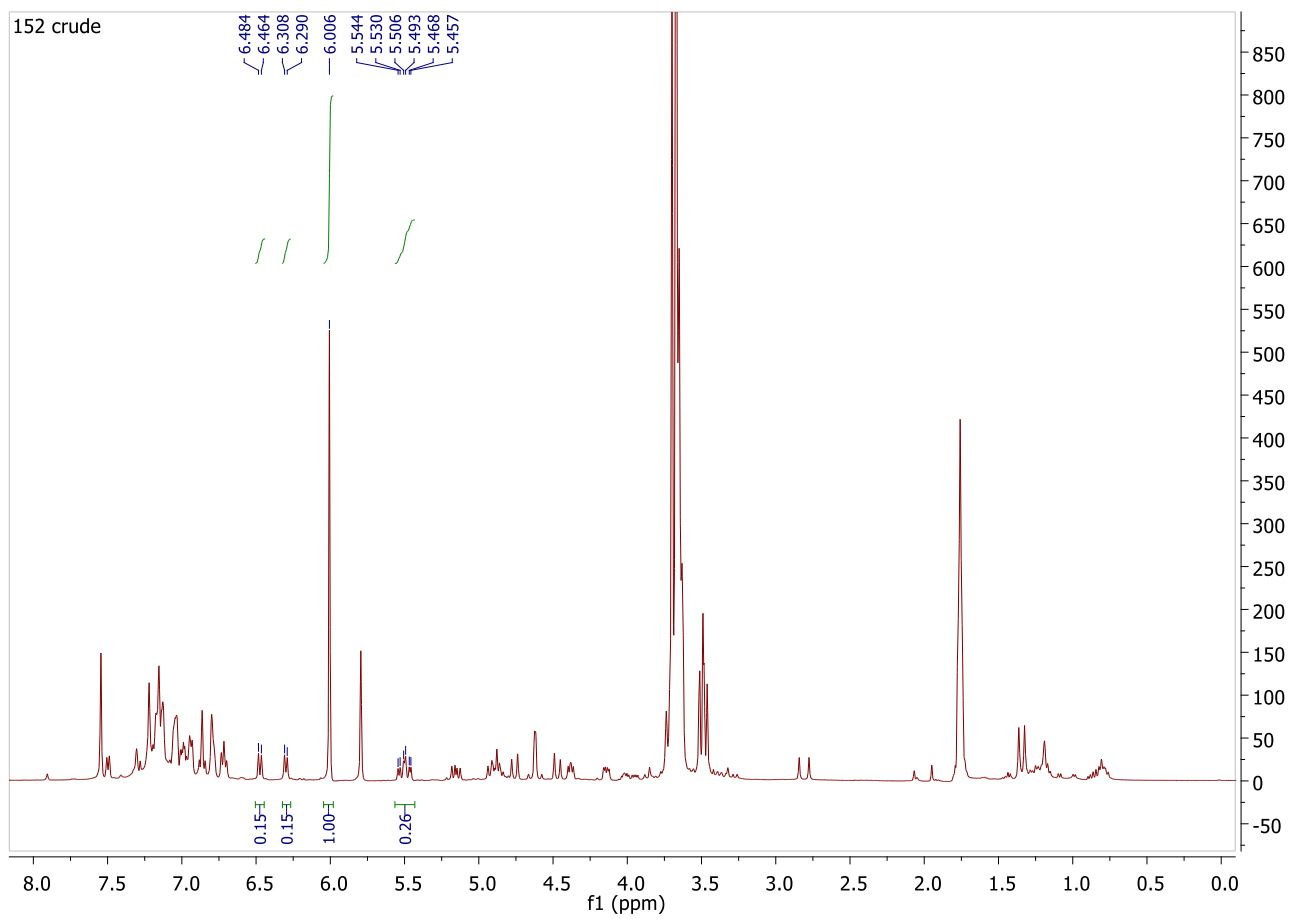

**<sup>1</sup>H NMR of 4ah**

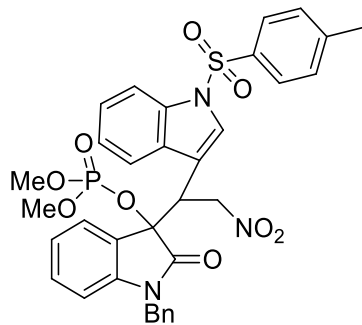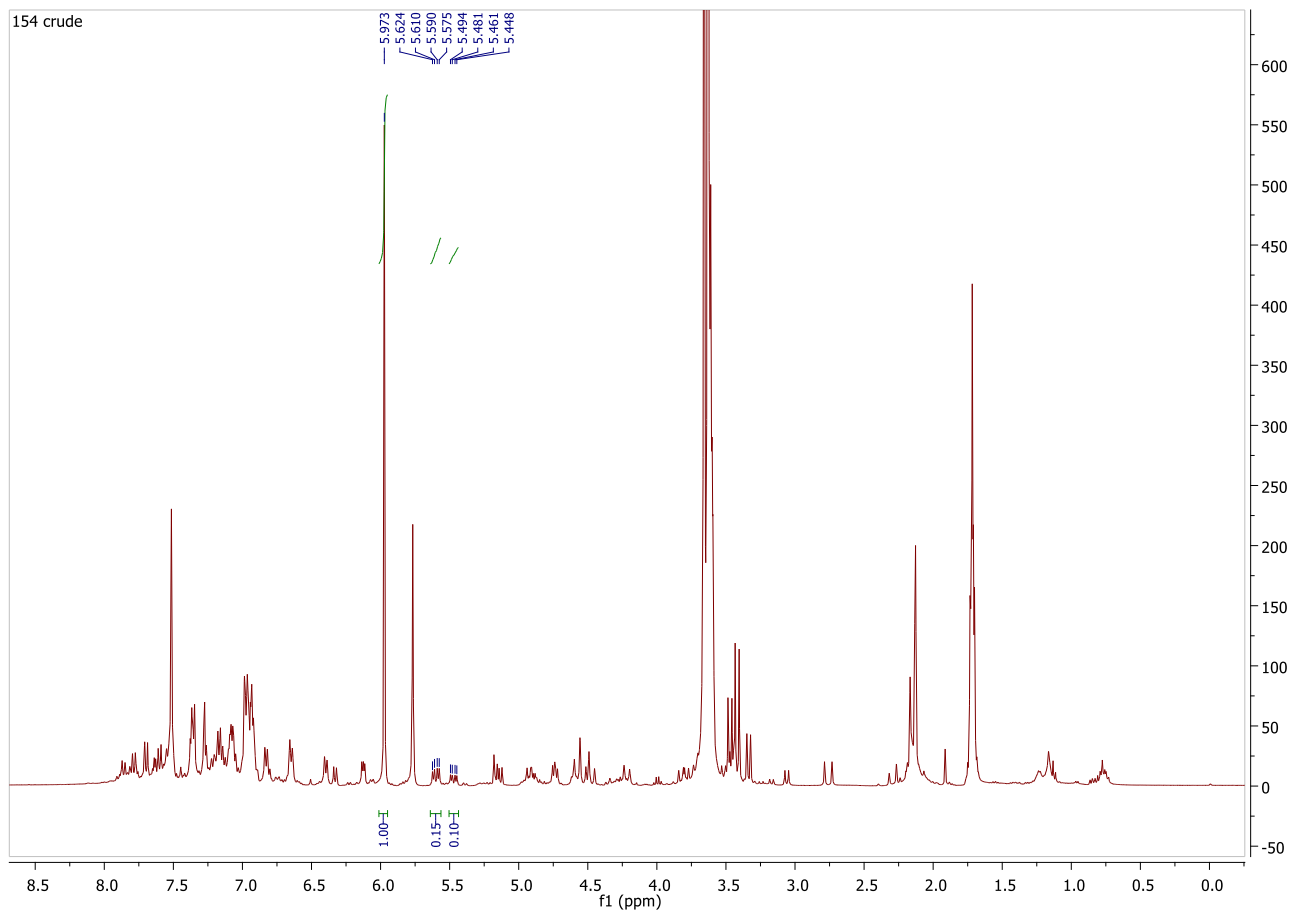

<sup>1</sup>H NMR of 4ai

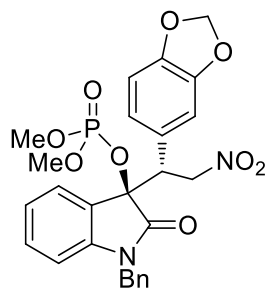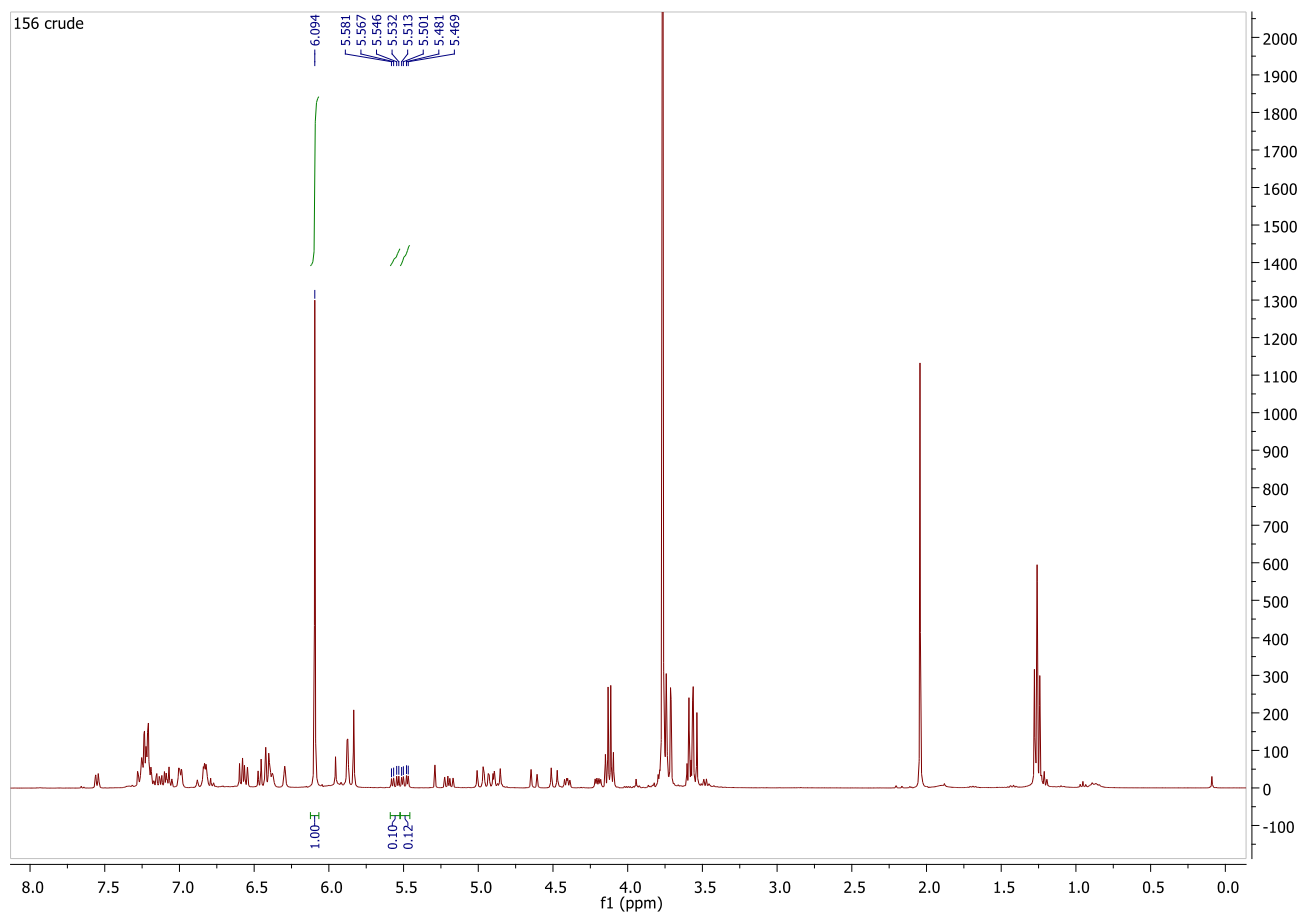

<sup>1</sup>H NMR of 4aj

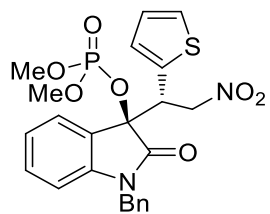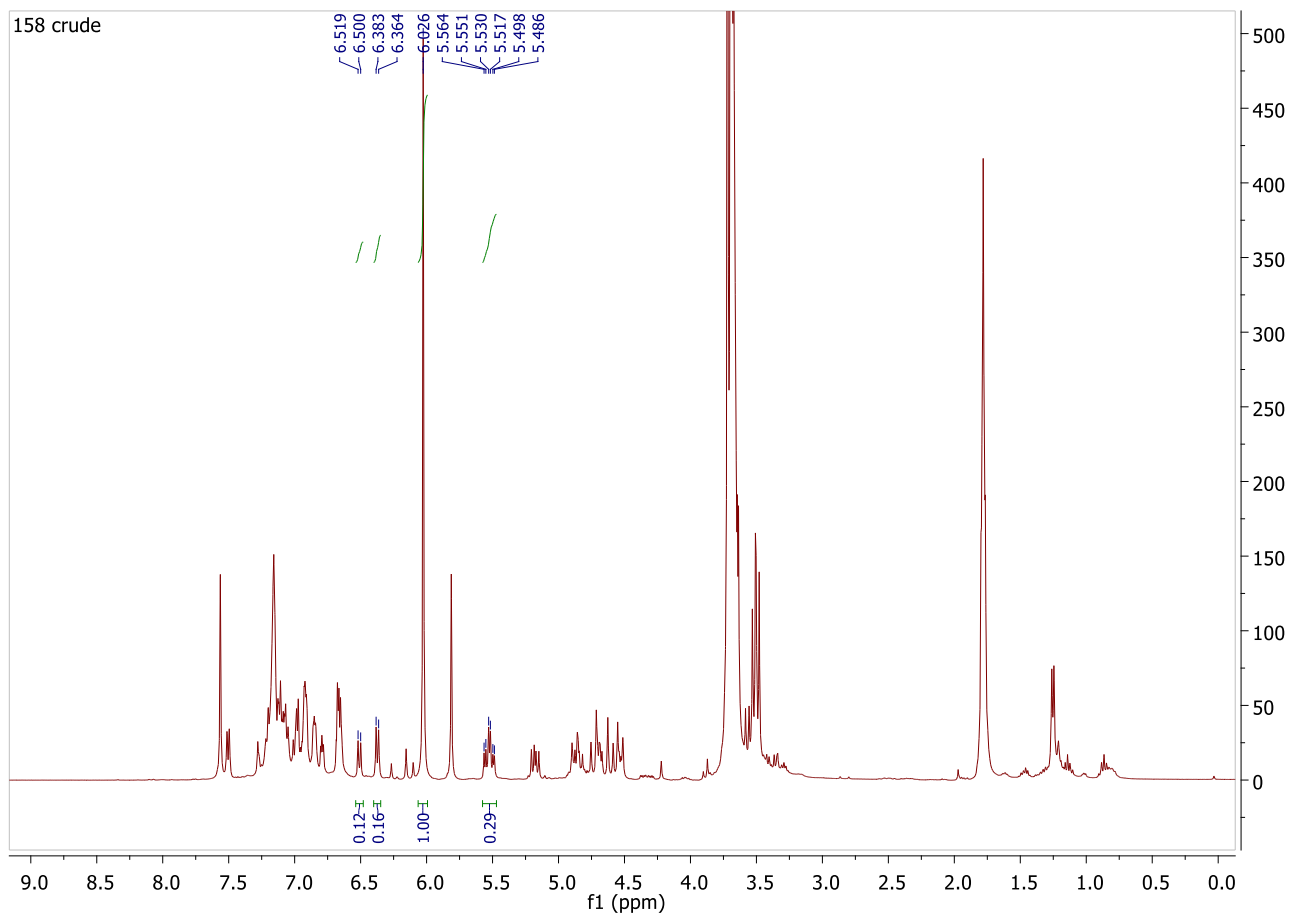

**<sup>1</sup>H NMR of 4ak**

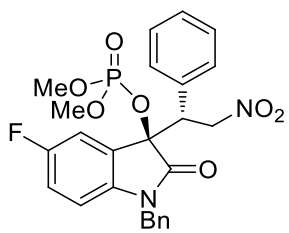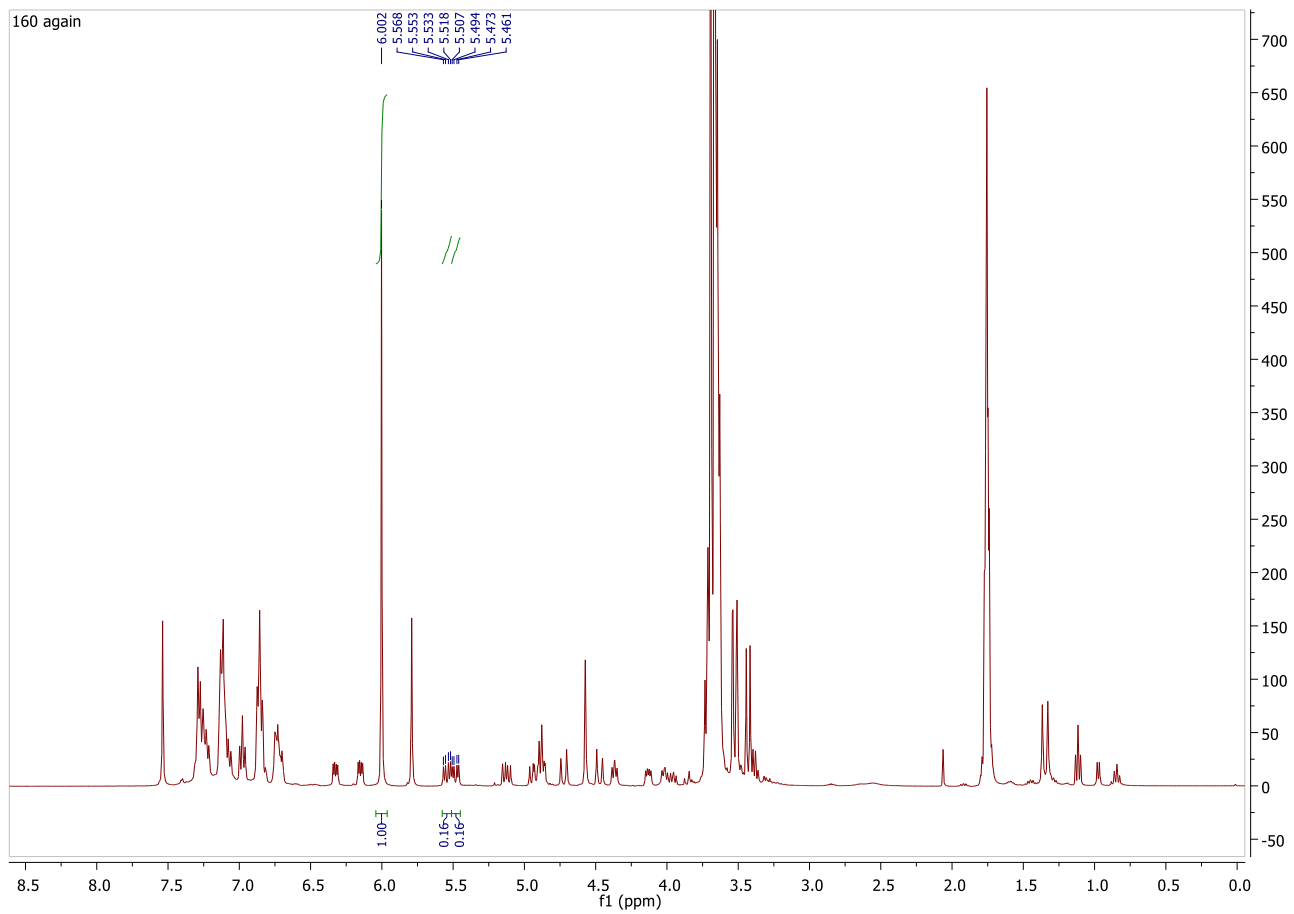

**<sup>1</sup>H NMR of 4ba**

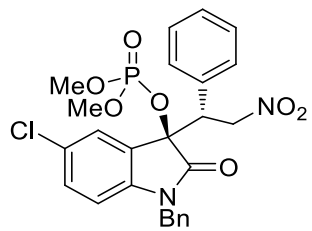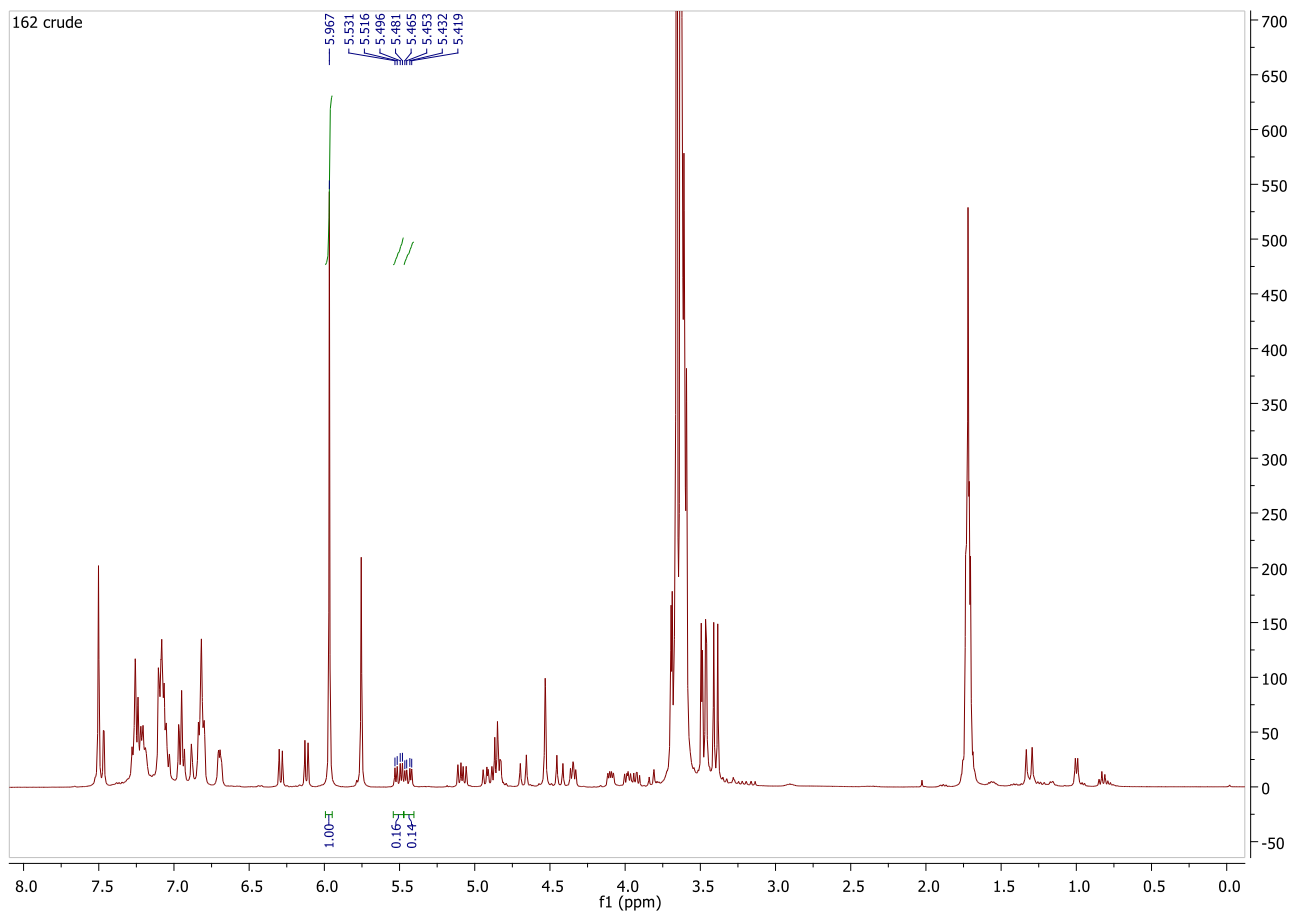

$^1\text{H}$  NMR of 4ca

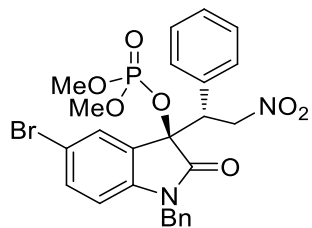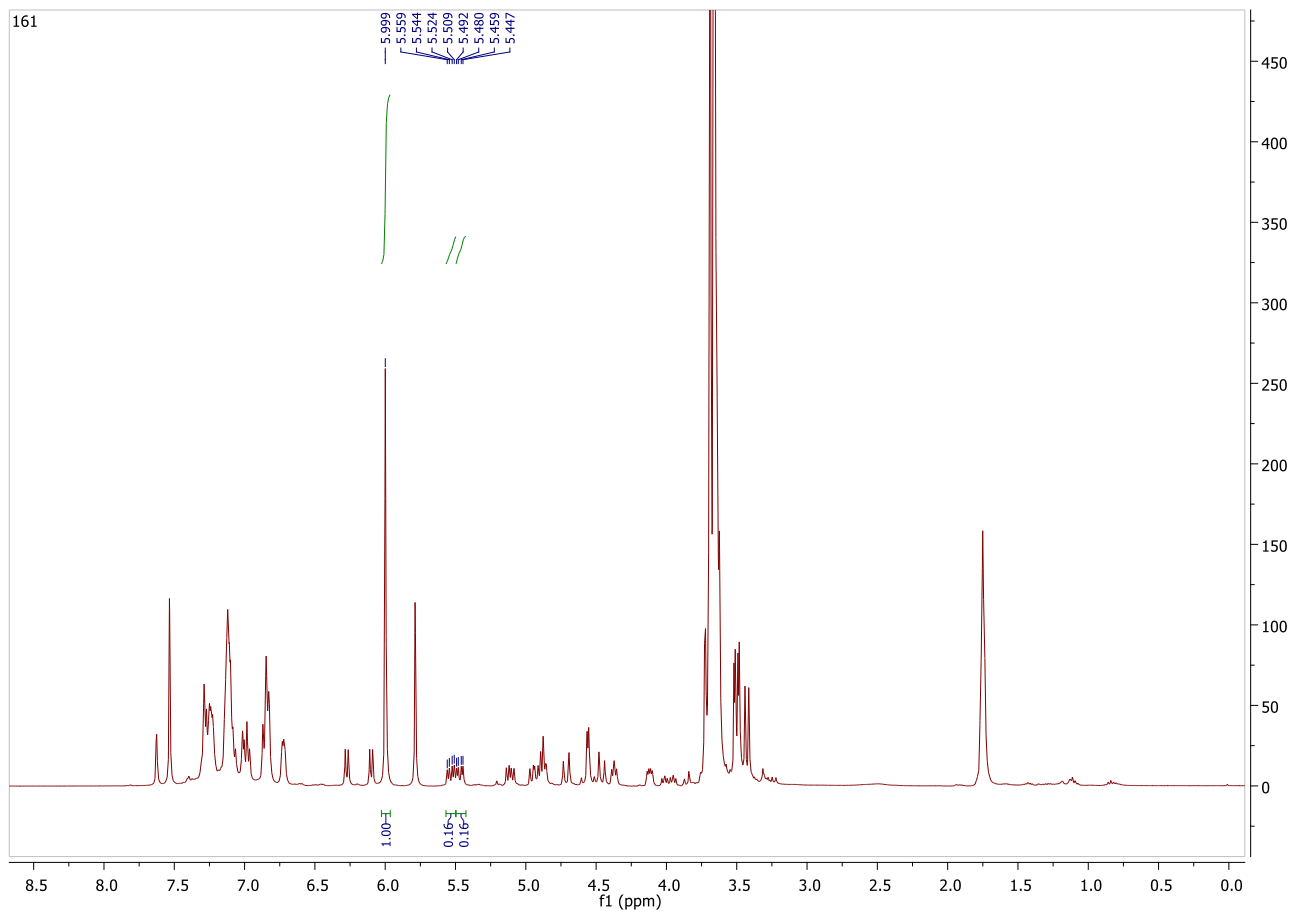

**<sup>1</sup>H NMR of 4da**



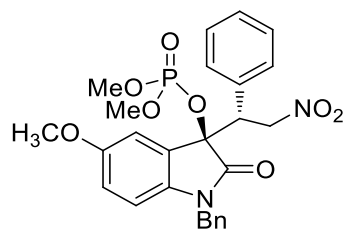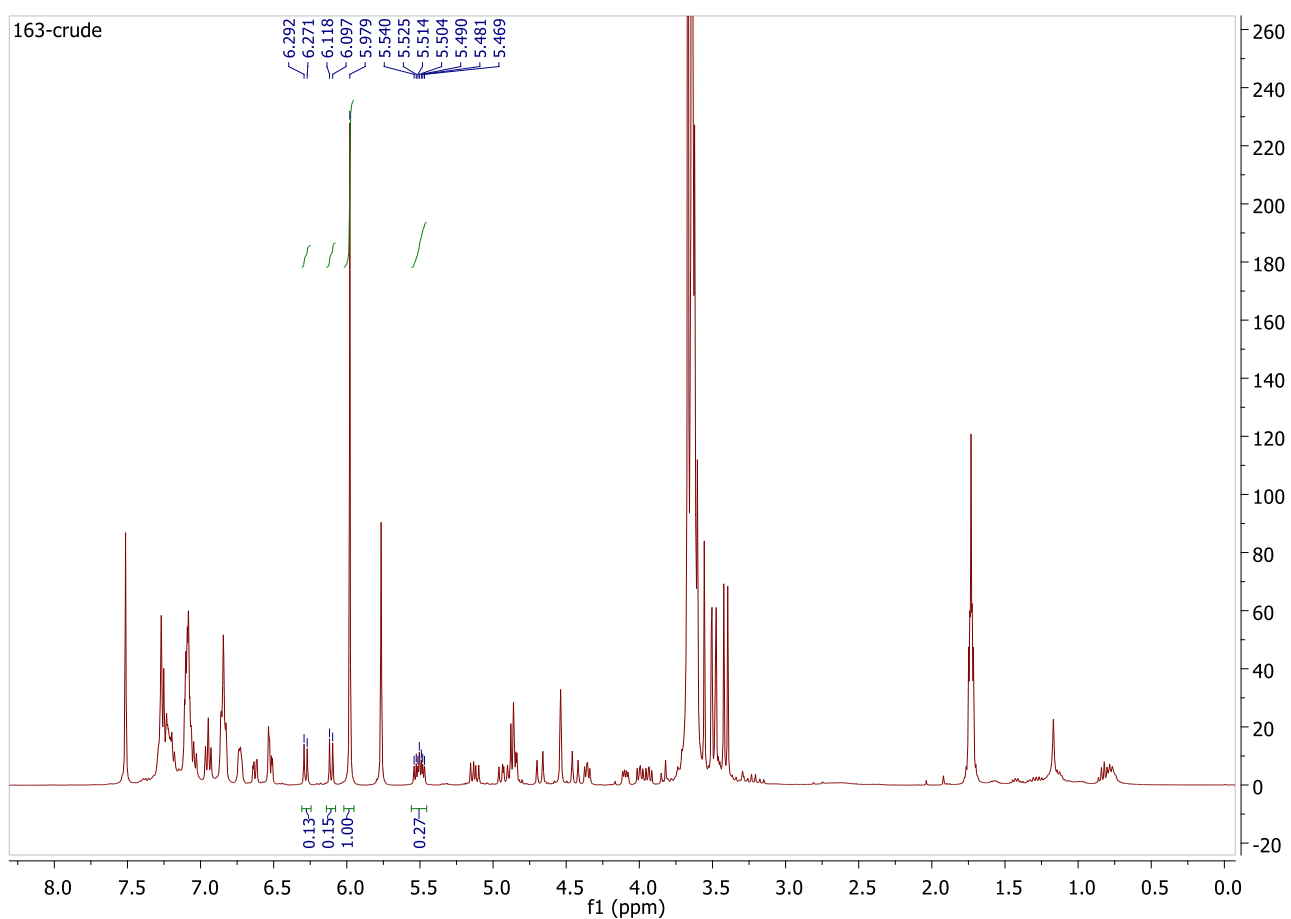

<sup>1</sup>H NMR of 4ea

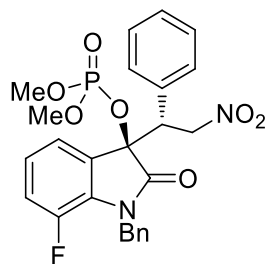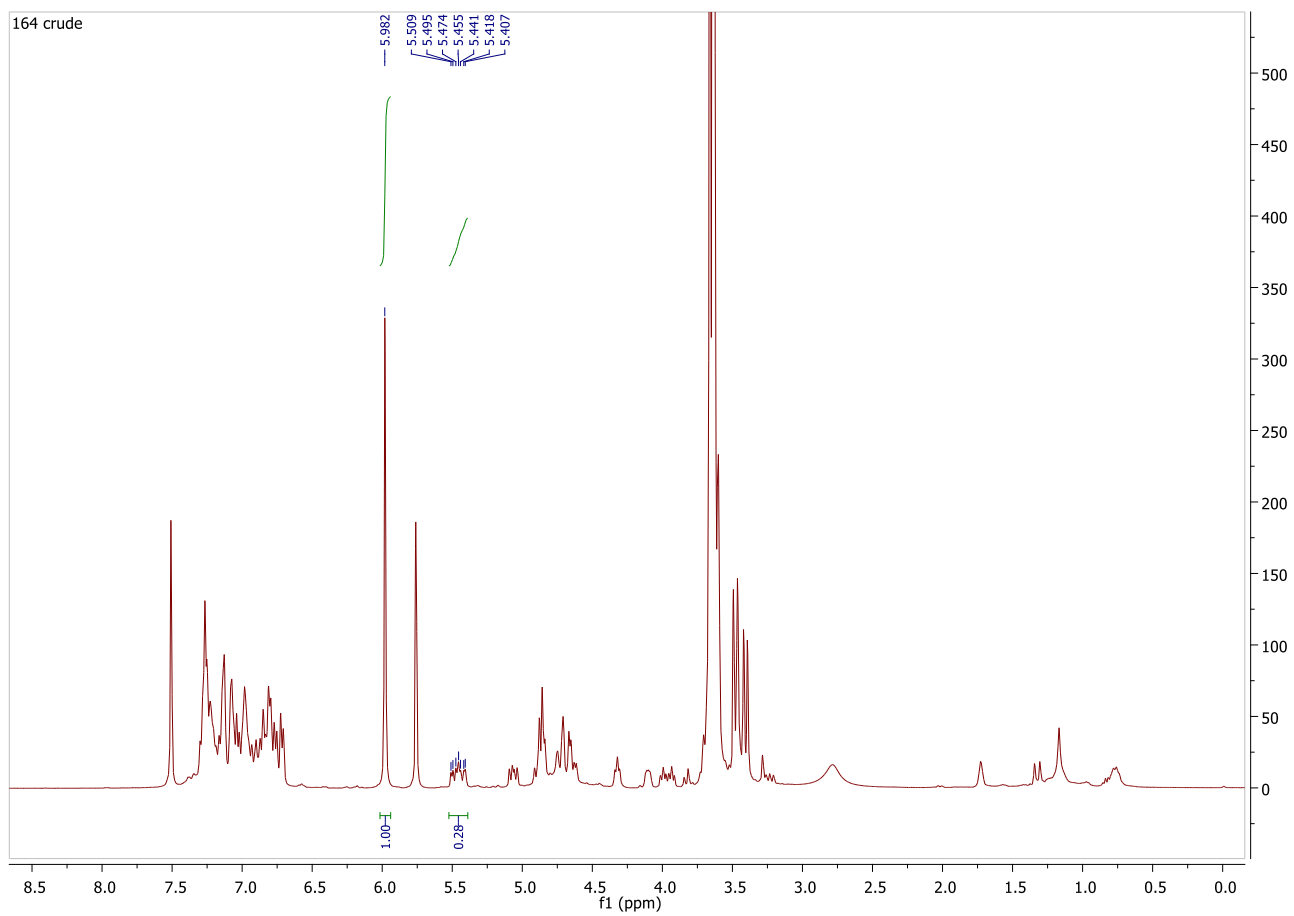

**<sup>1</sup>H NMR of 4fa**

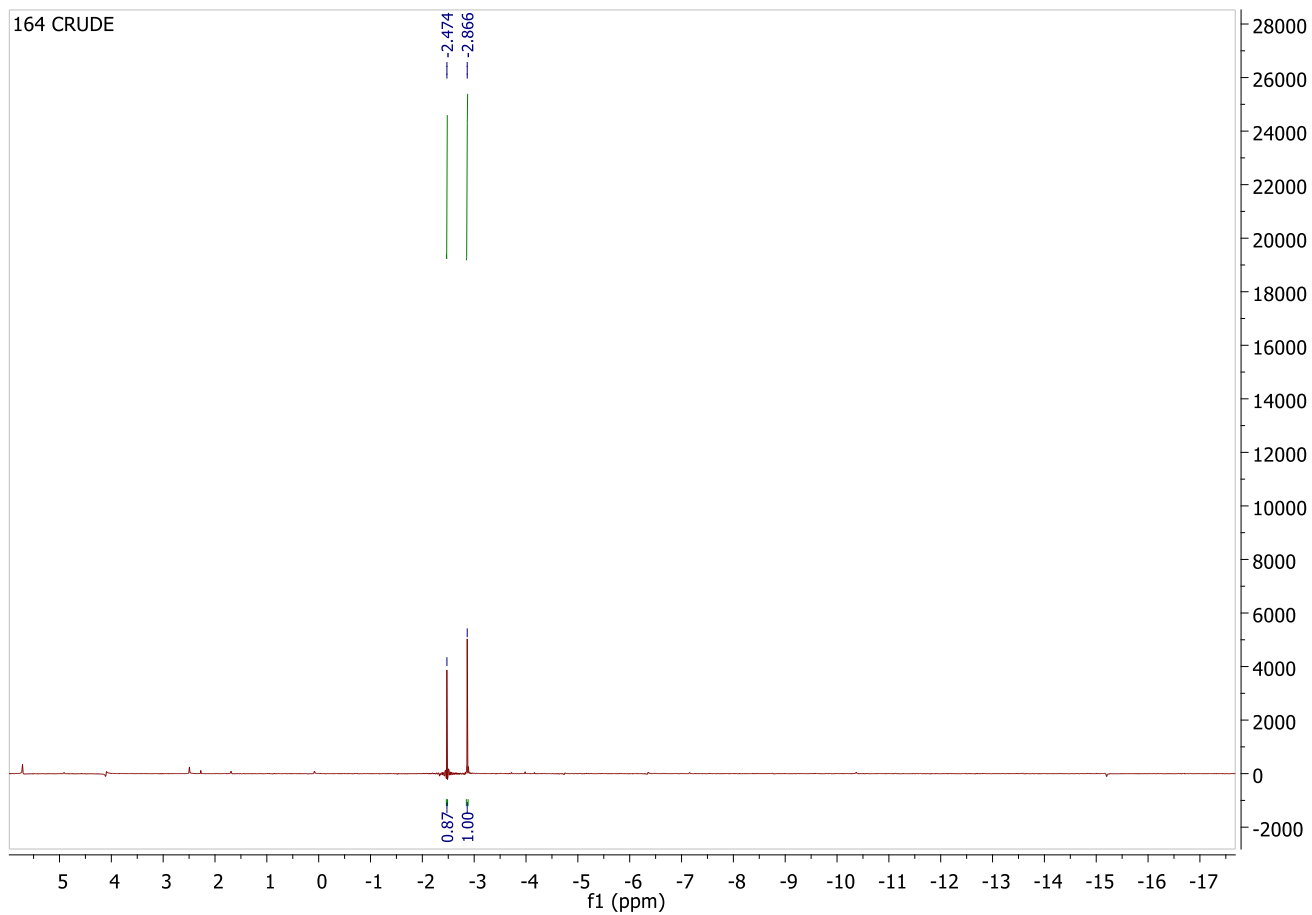

$^{31}\text{P}$  NMR of 4fa

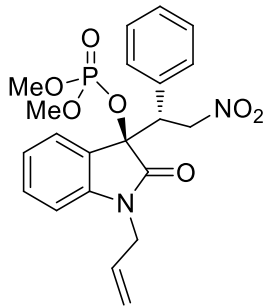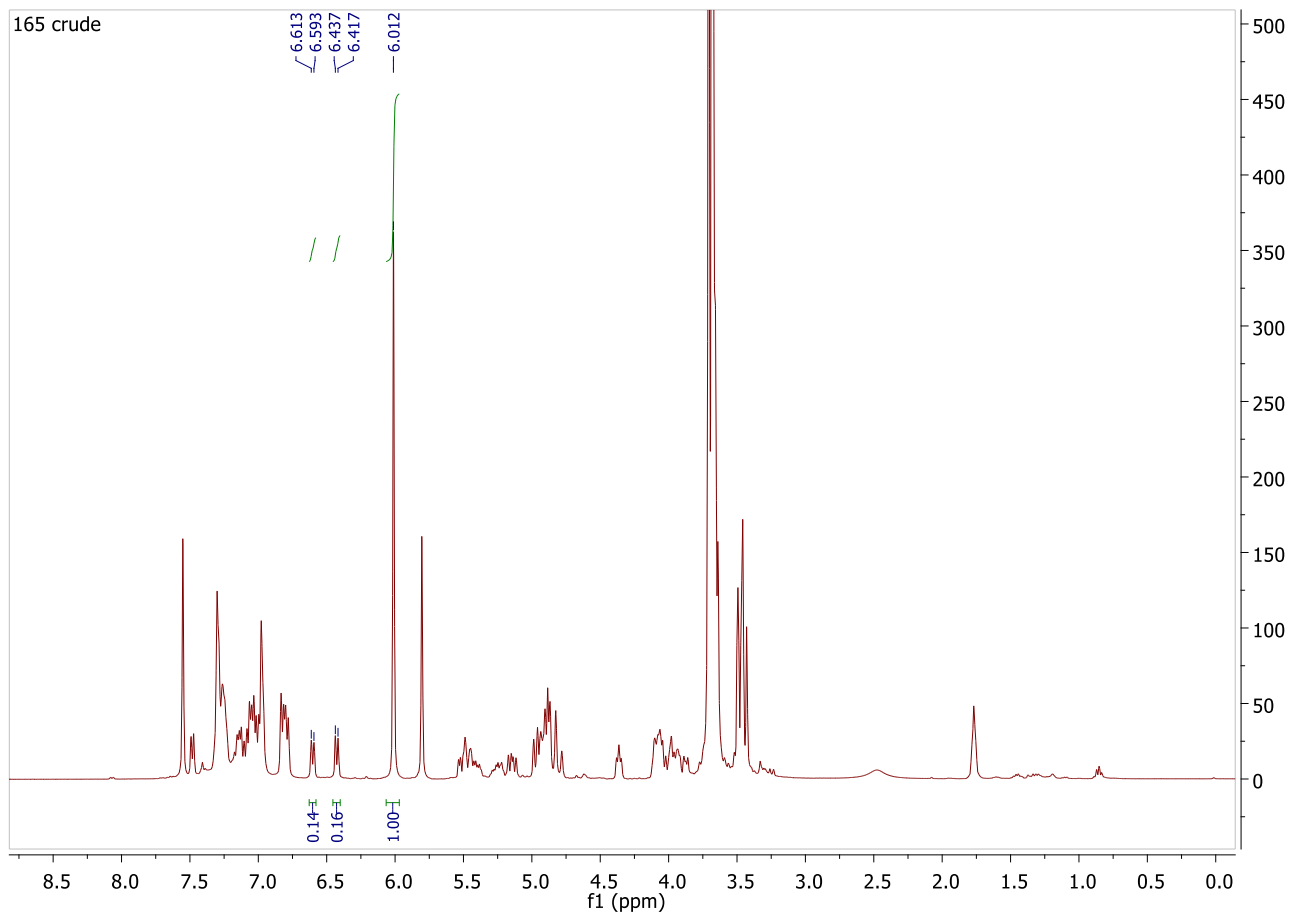

**<sup>1</sup>H NMR of 4ga**

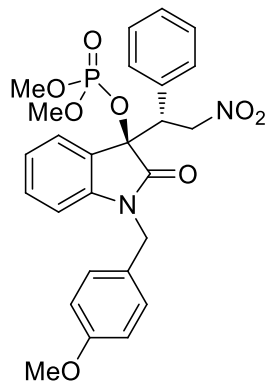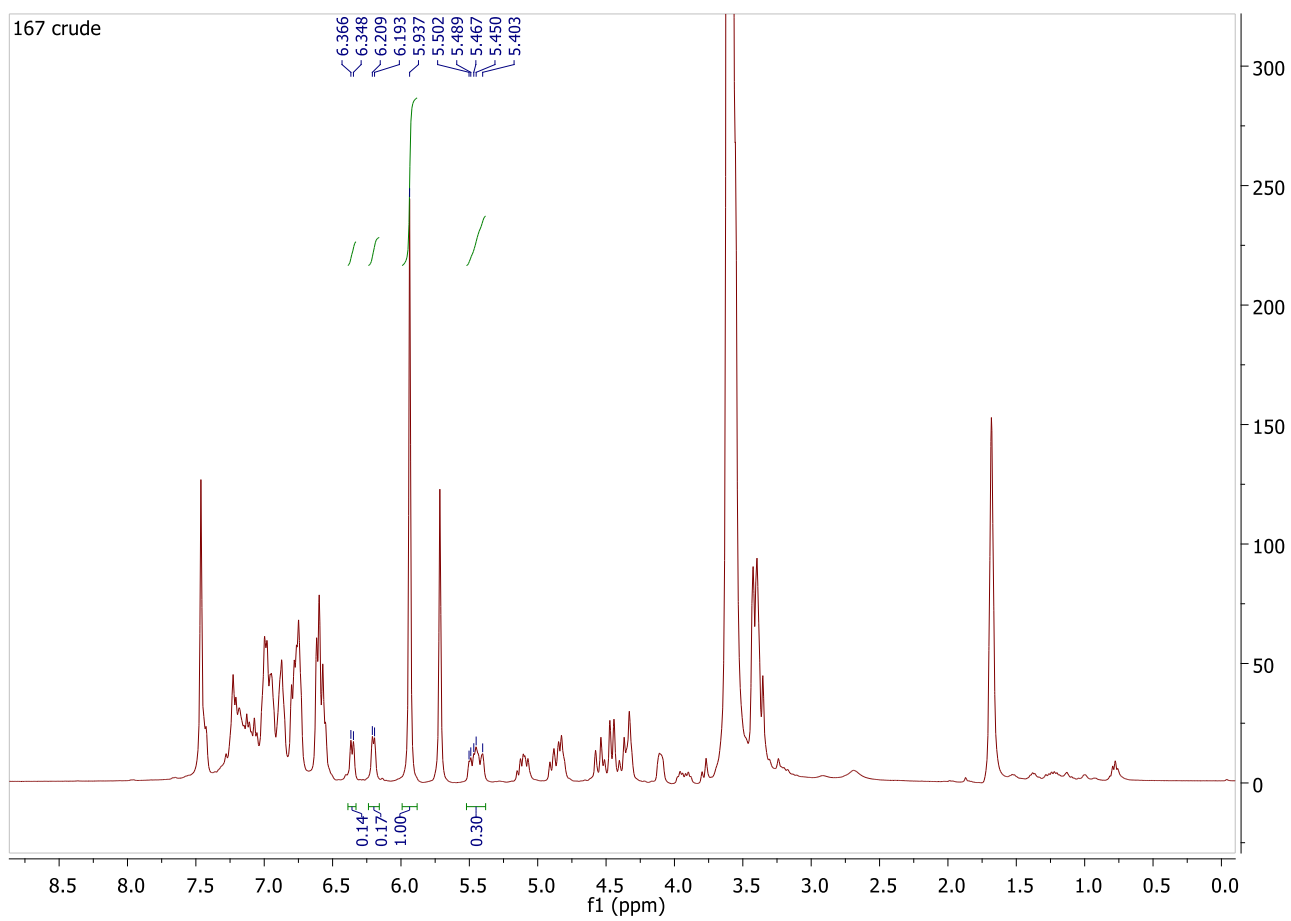

**<sup>1</sup>H NMR of 4ha**

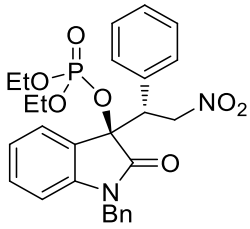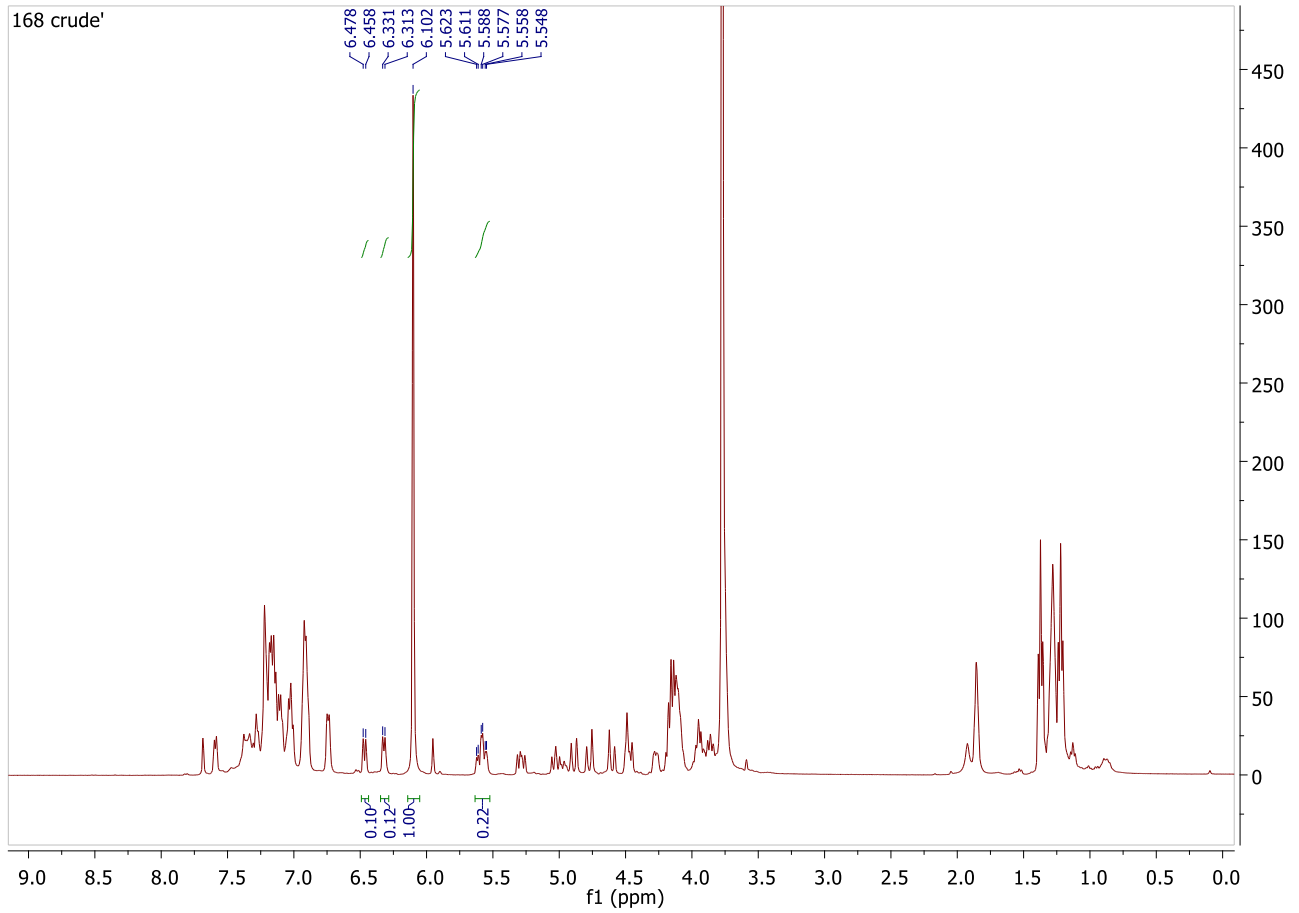

# <sup>1</sup>H and <sup>13</sup>C NMR spectra of new compounds

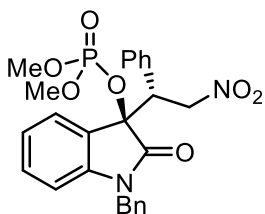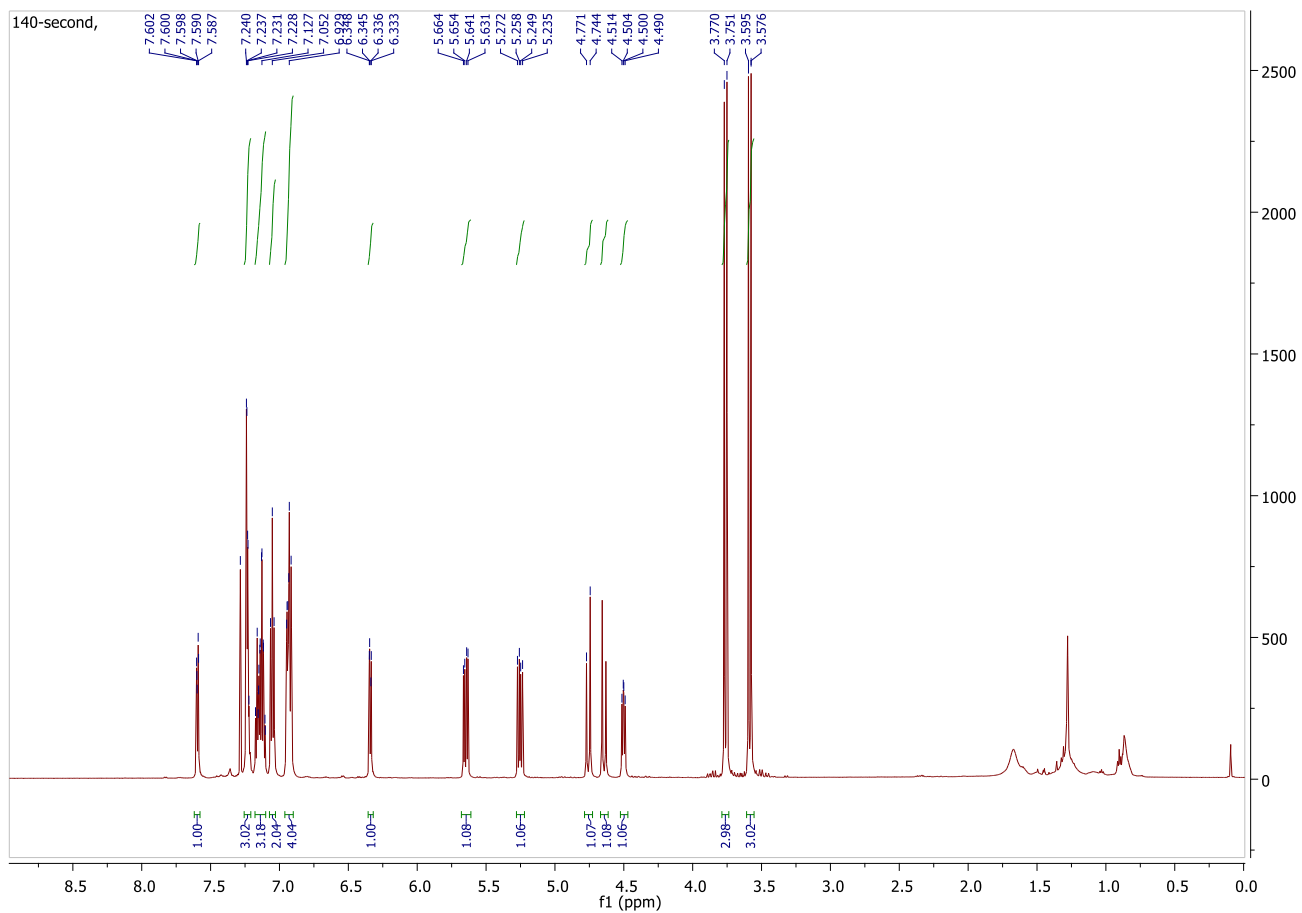

<sup>1</sup>H NMR of 4aa

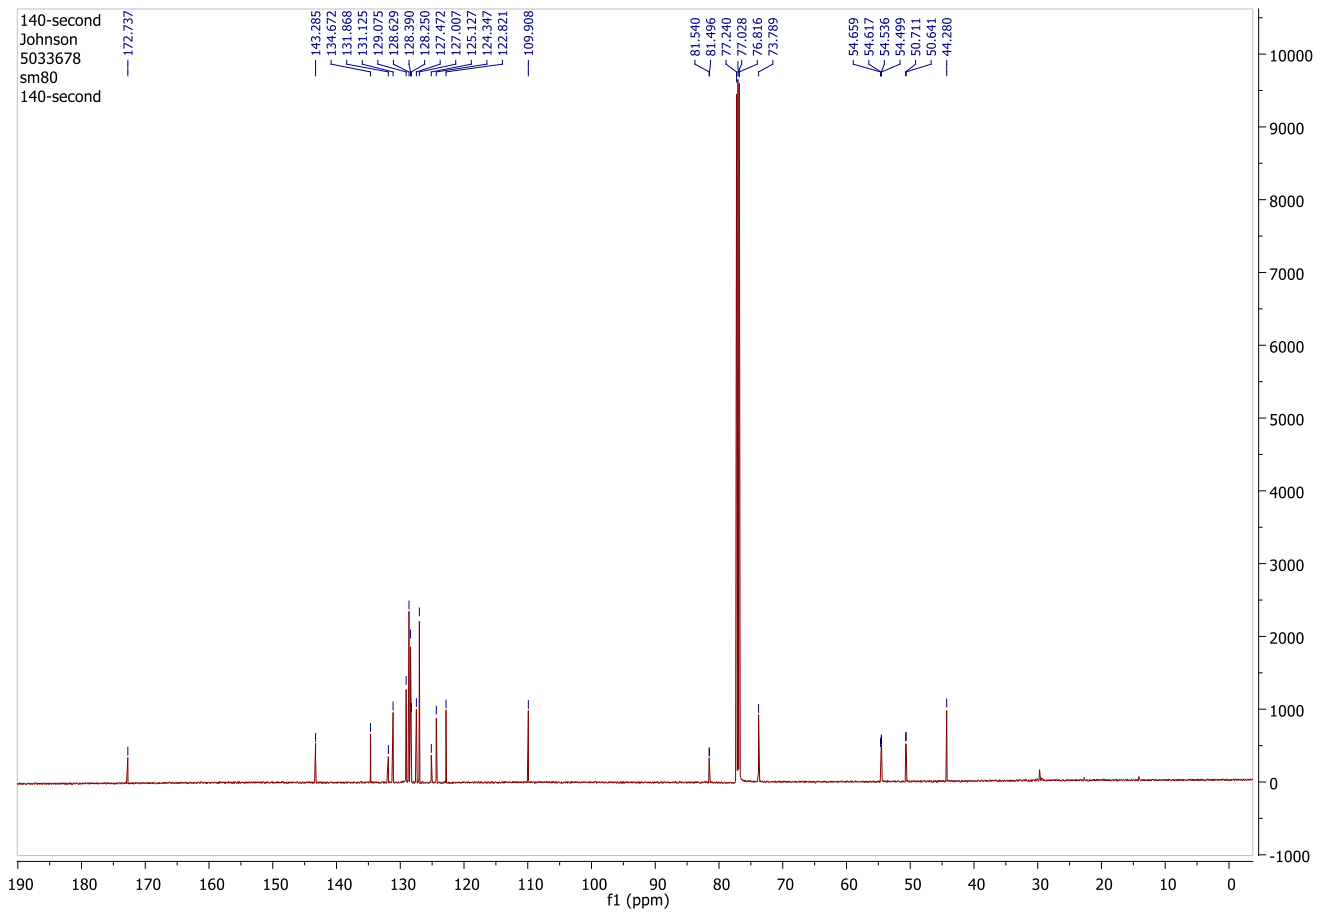

**$^{13}\text{C}$  NMR of 4aa**



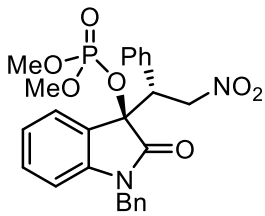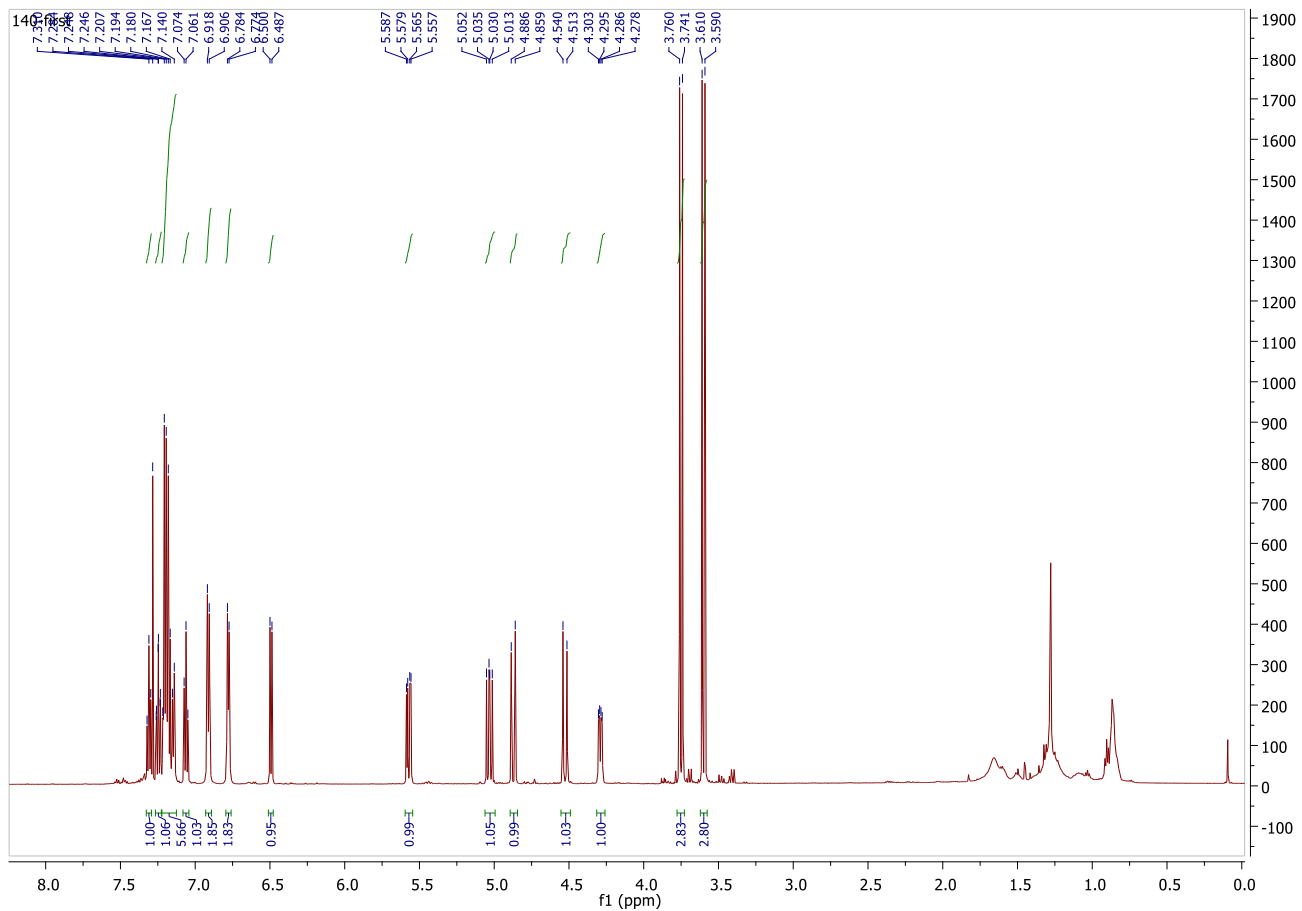

**<sup>1</sup>H NMR of 4aa (2<sup>nd</sup> diastereomer)**

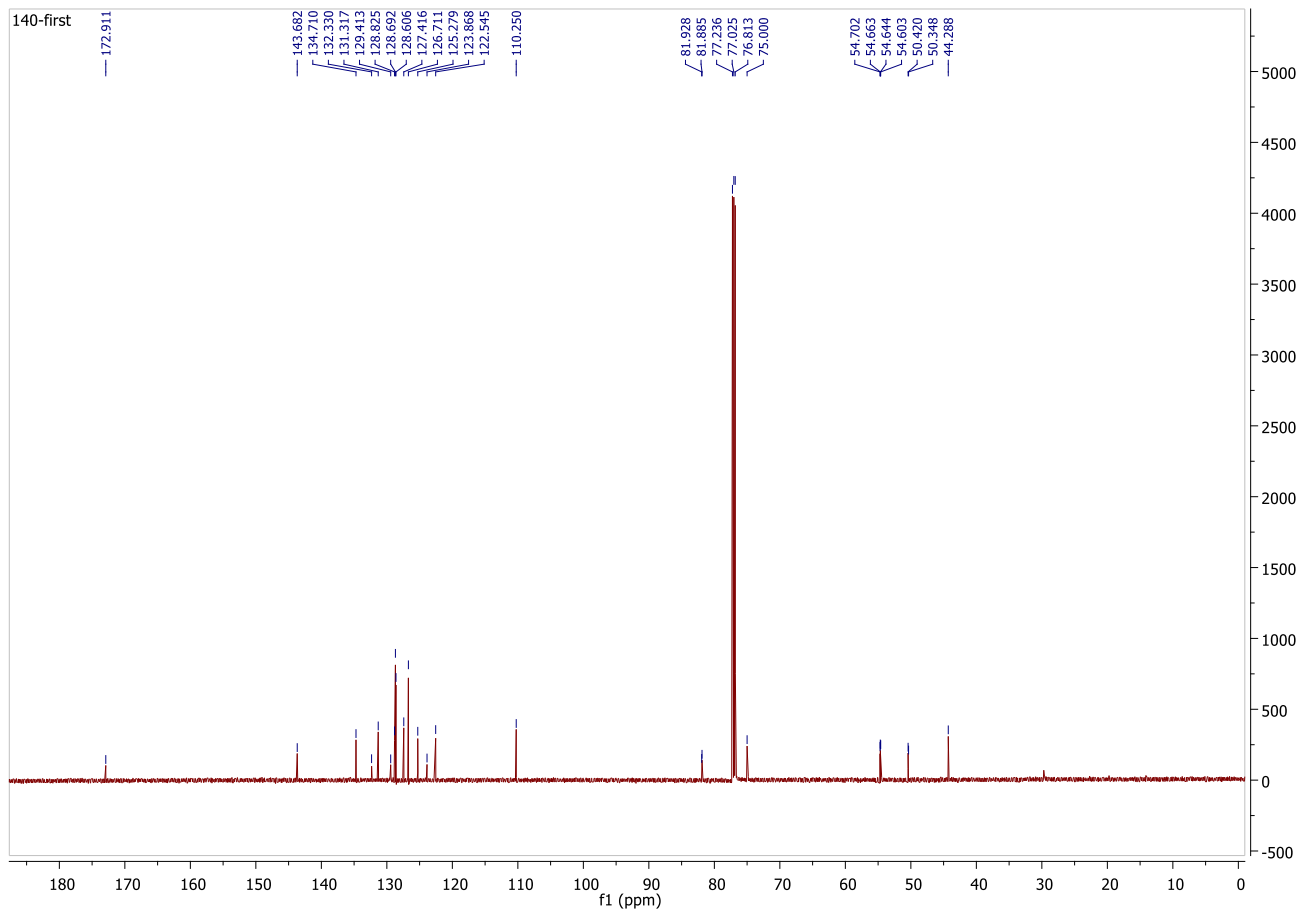

$^{13}\text{C}$  NMR of 4aa (2<sup>nd</sup> diastereomer)

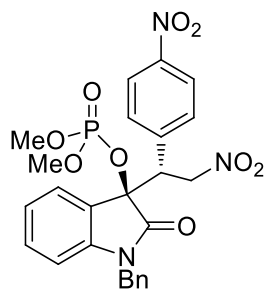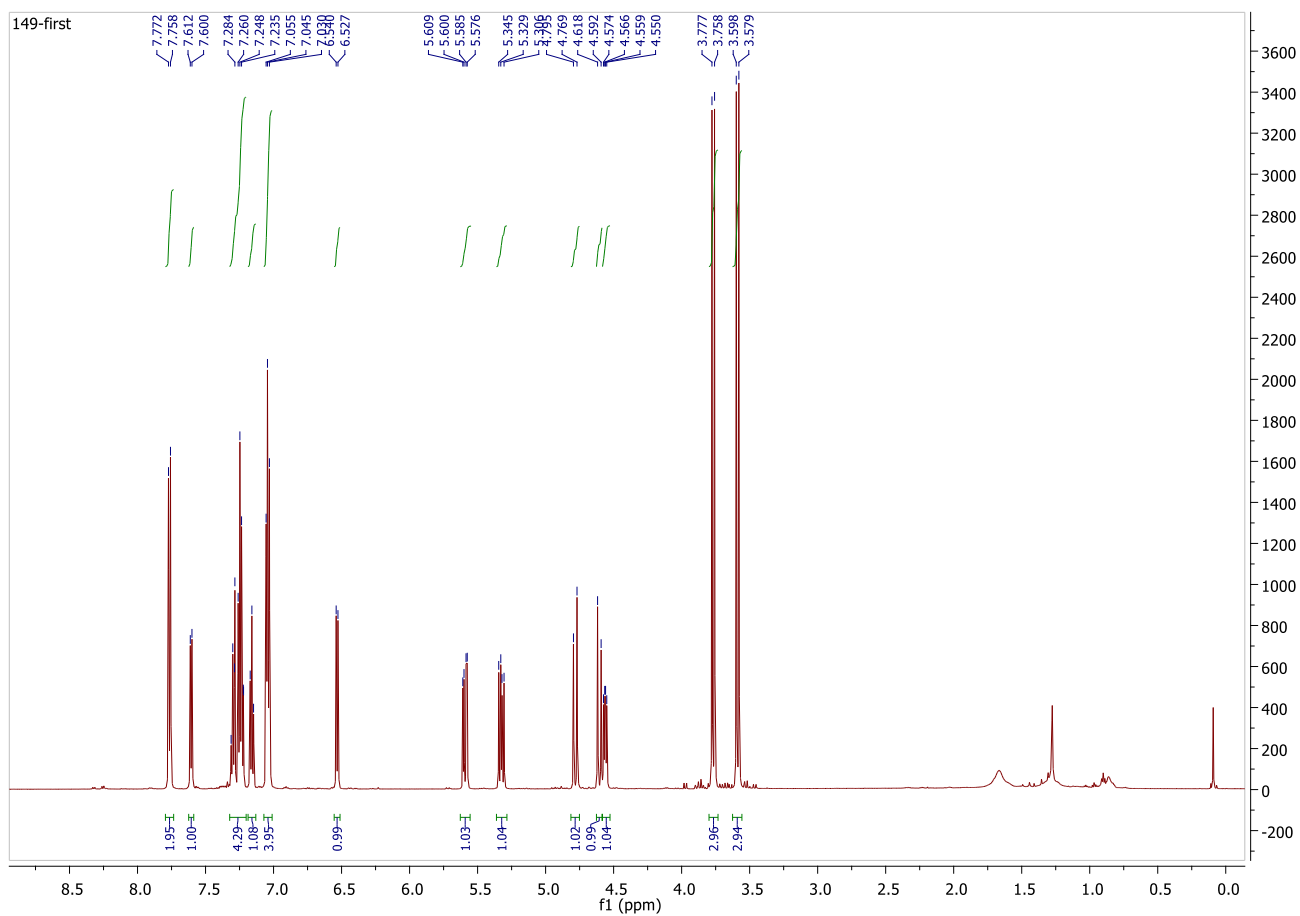

<sup>1</sup>H NMR of 4ab

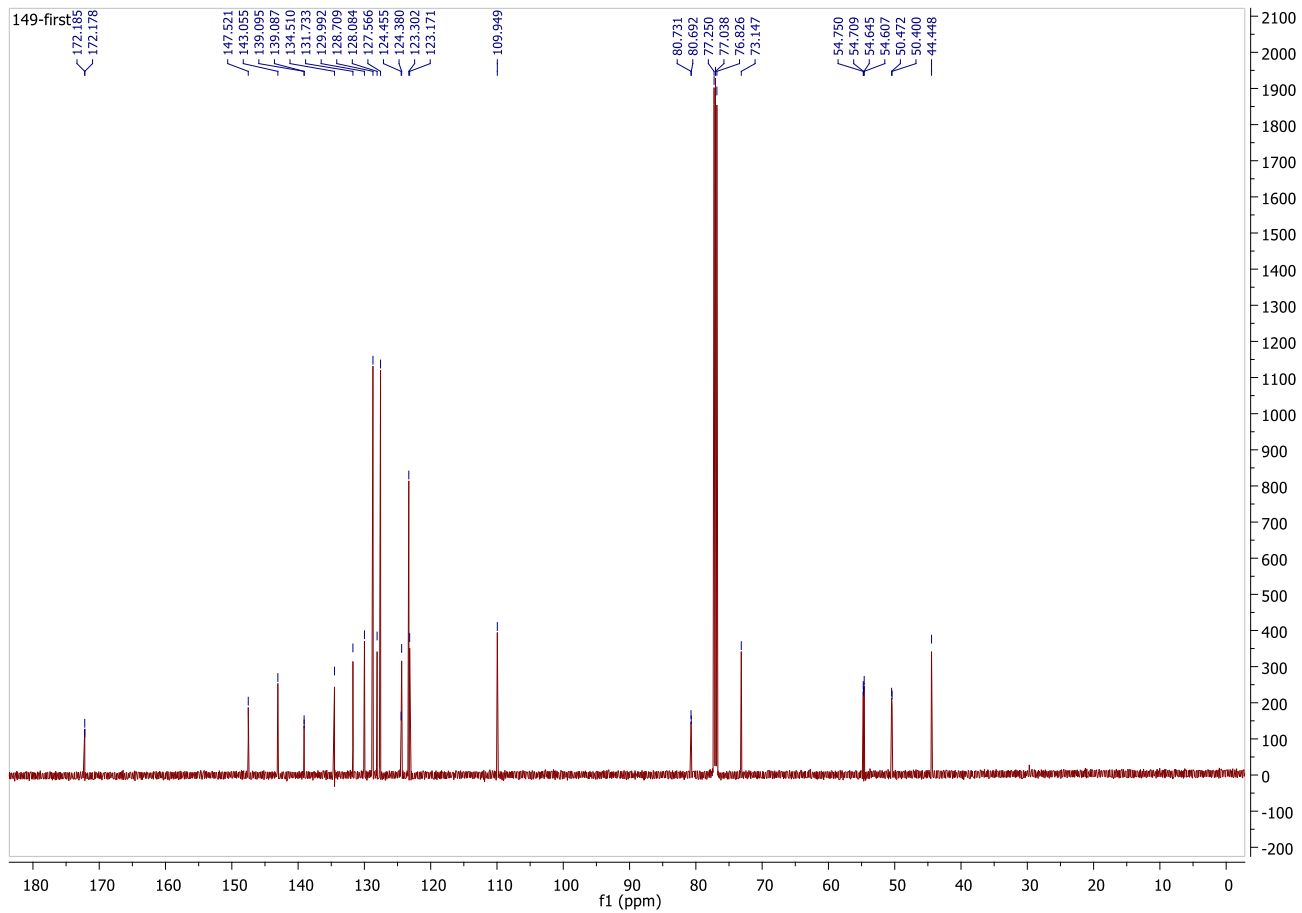

**$^{13}\text{C}$  NMR of 4ab**

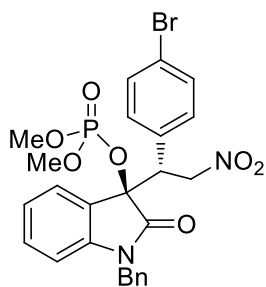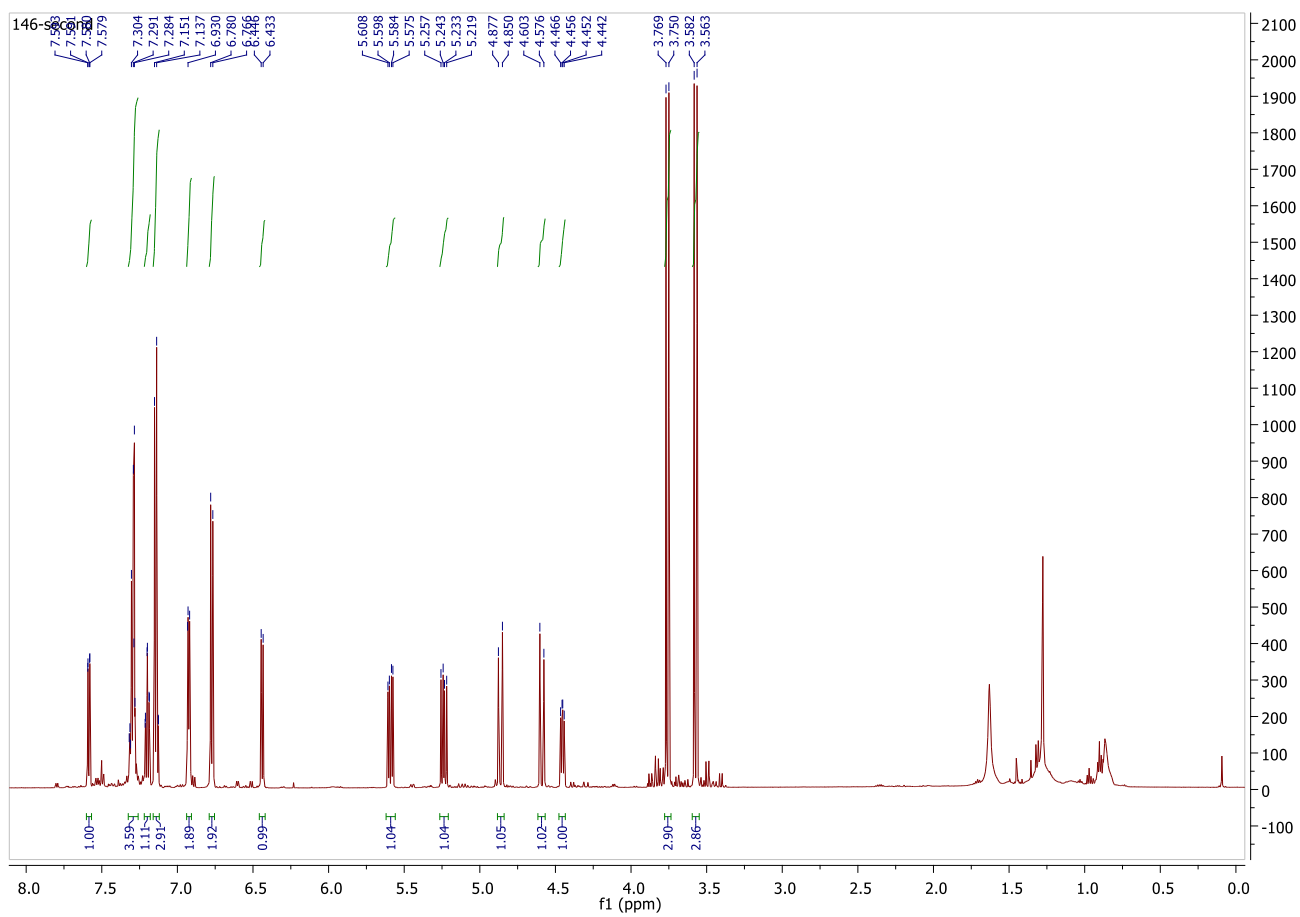

<sup>1</sup>H NMR of 4ac

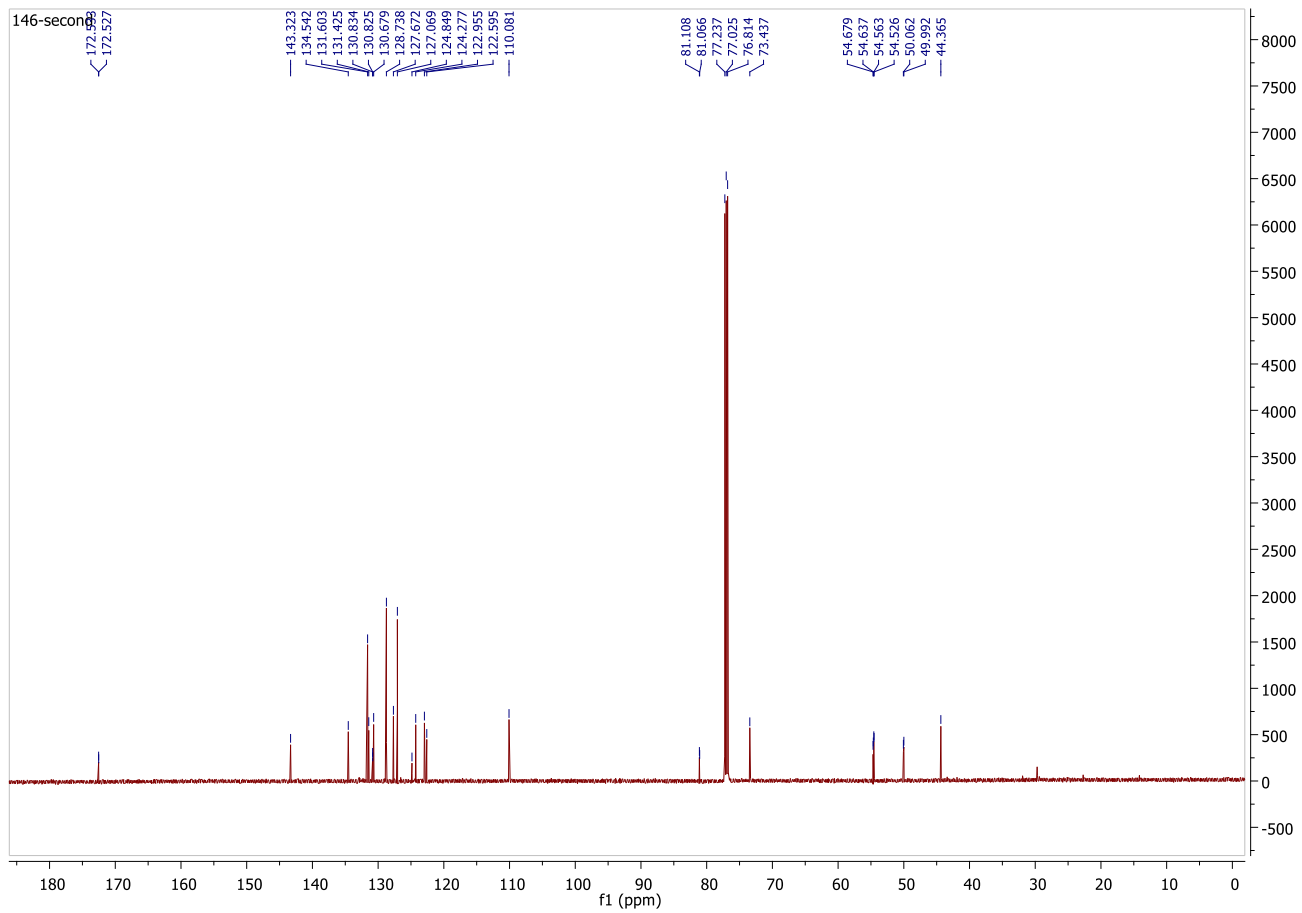

<sup>13</sup>C NMR of 4ac

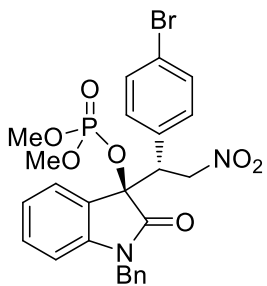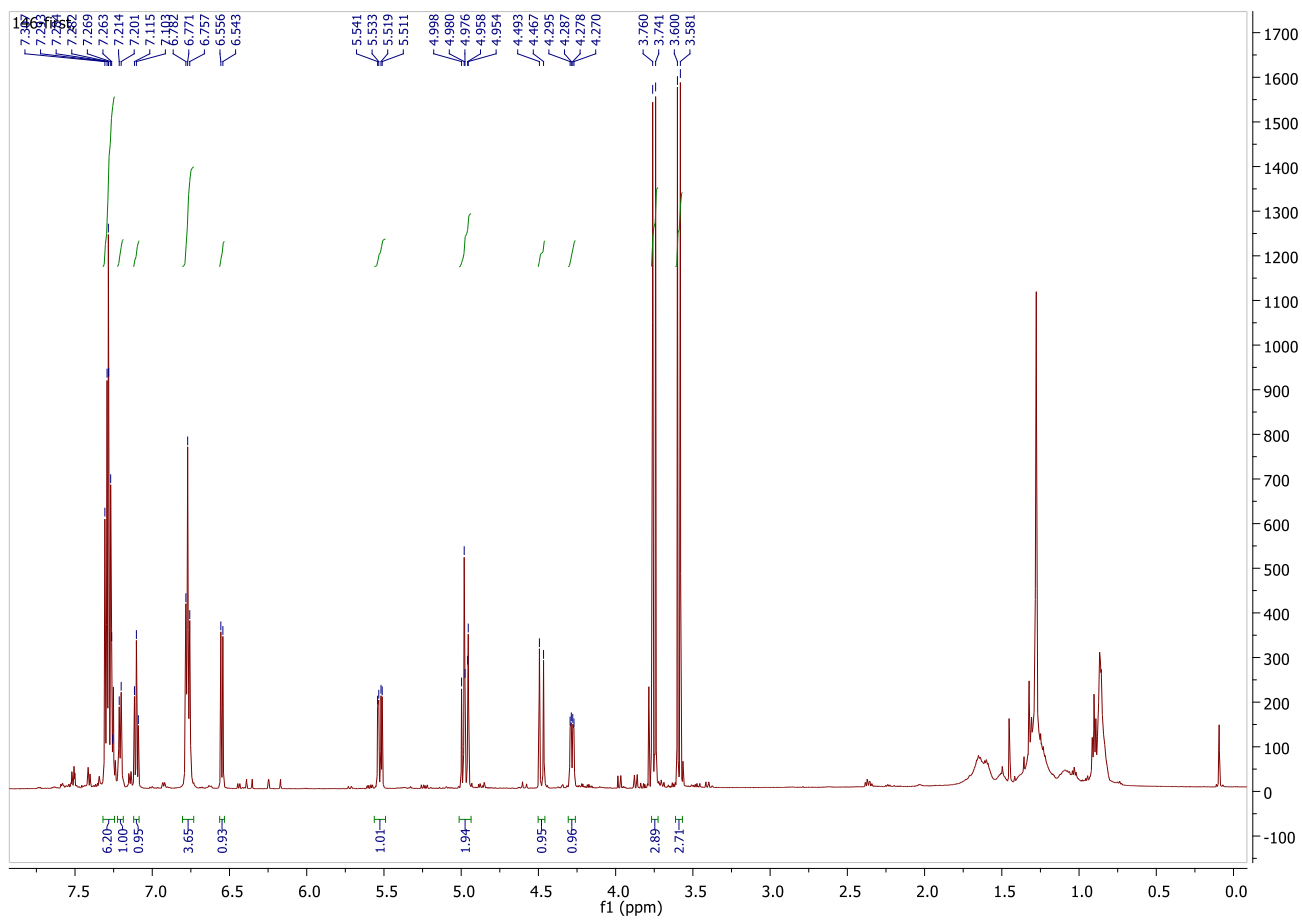

<sup>1</sup>H NMR of 4ac (2<sup>nd</sup> diastereomer)

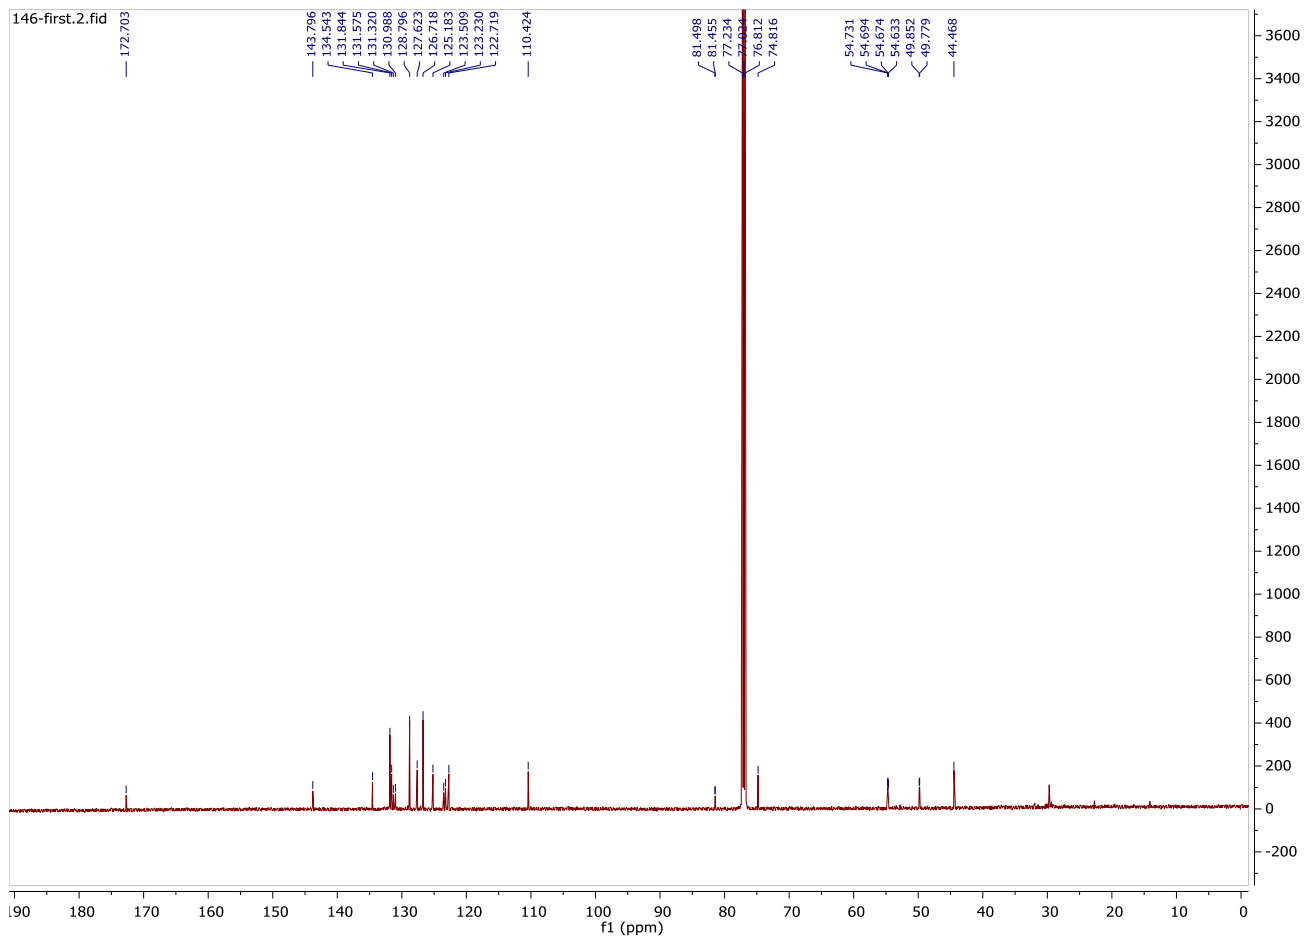

**$^{13}\text{C}$  NMR of 4ac (2<sup>nd</sup> diastereomer)**



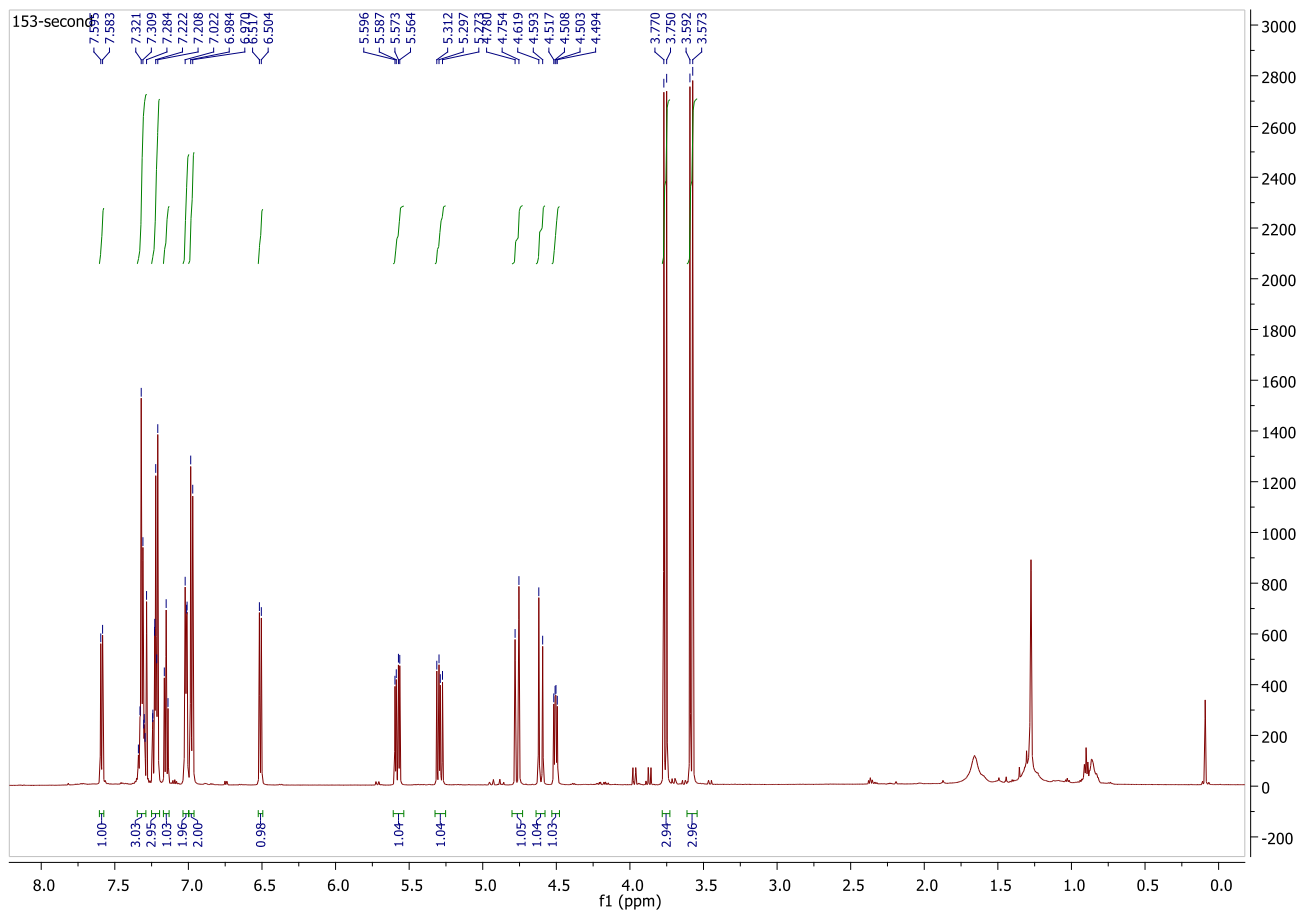

<sup>1</sup>H NMR of 4ad

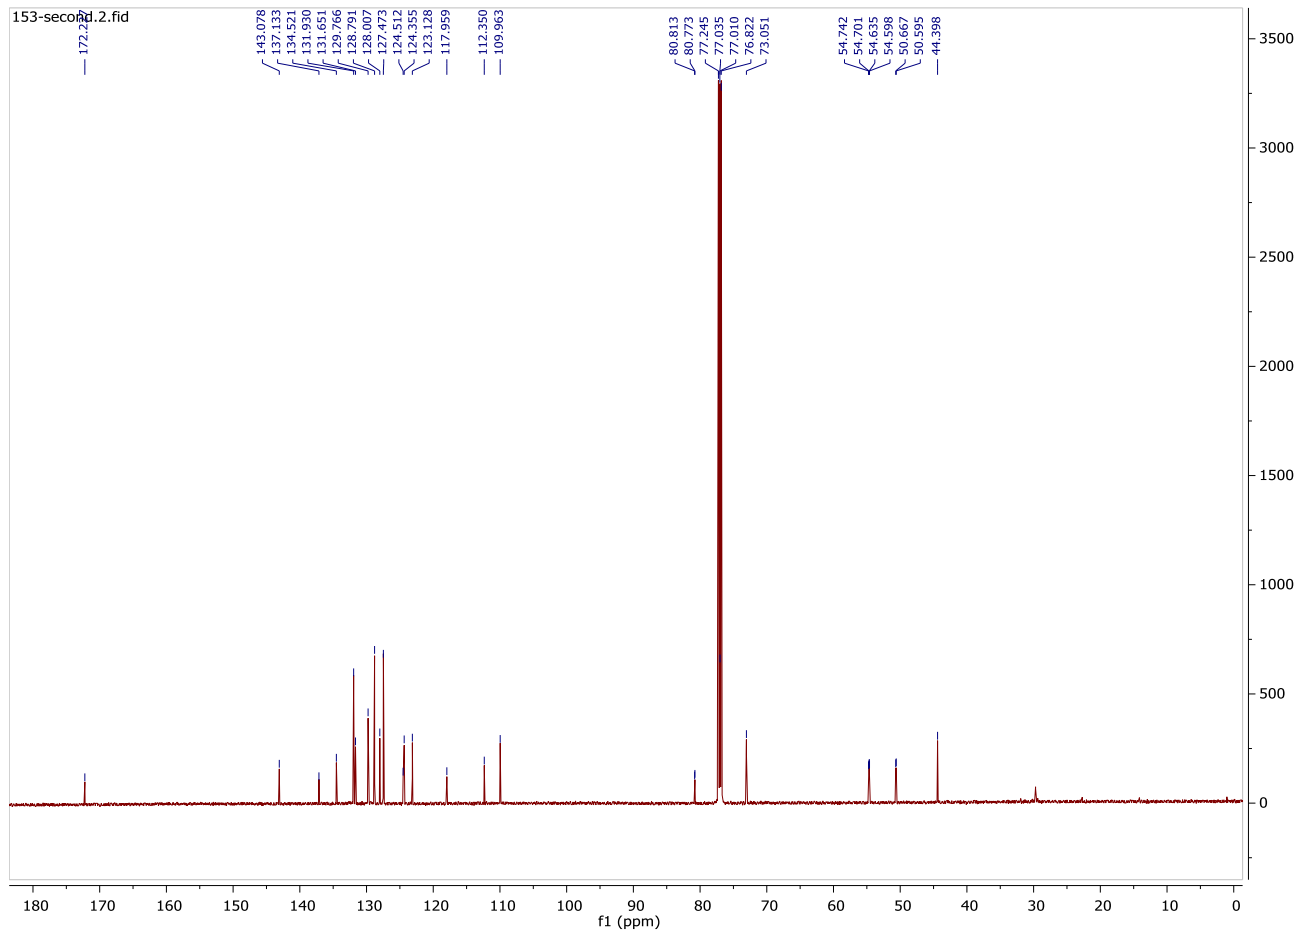

$^{13}\text{C}$  NMR of 4ad

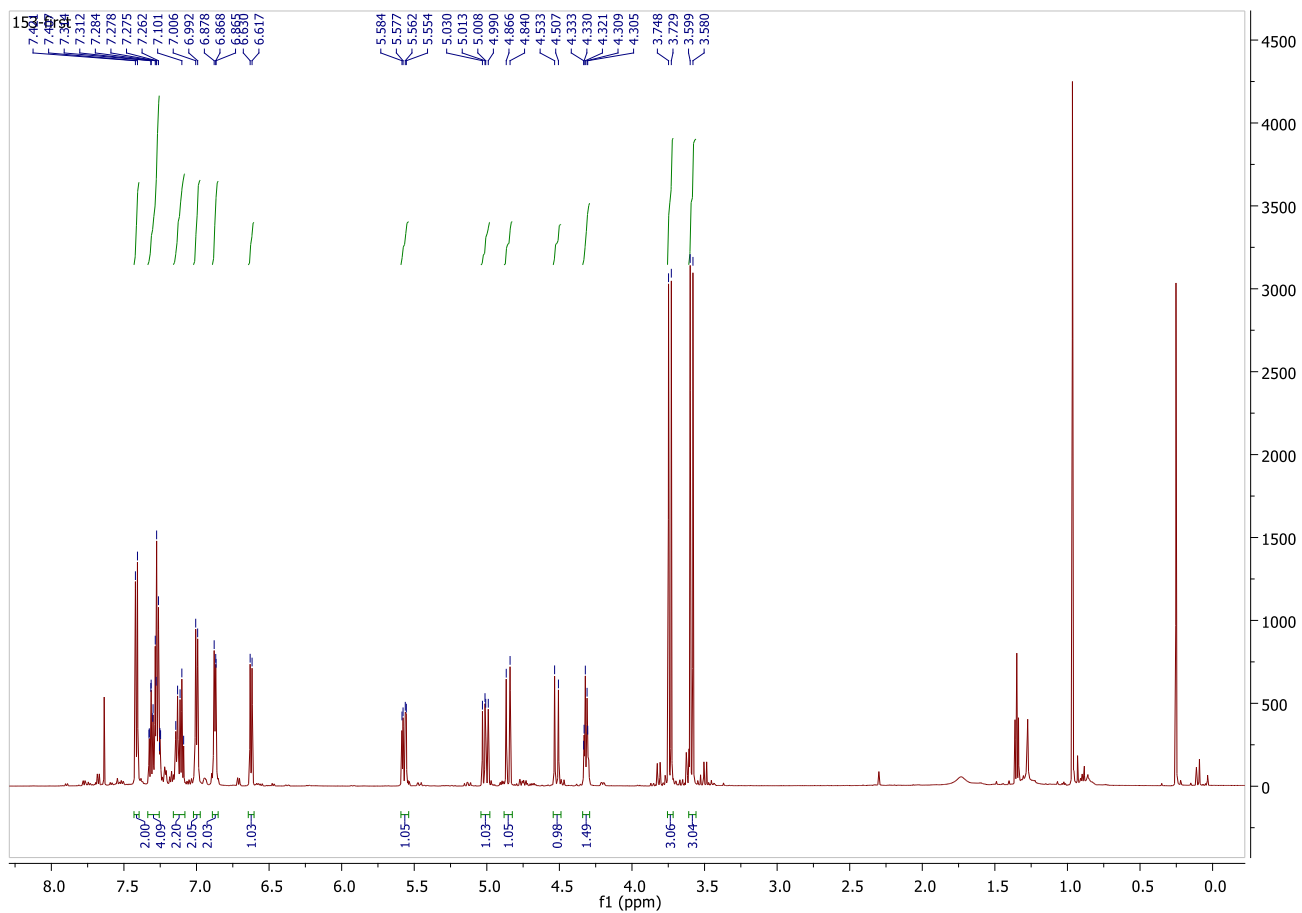

**<sup>1</sup>H NMR of 4ad (2<sup>nd</sup> diastereomer)**

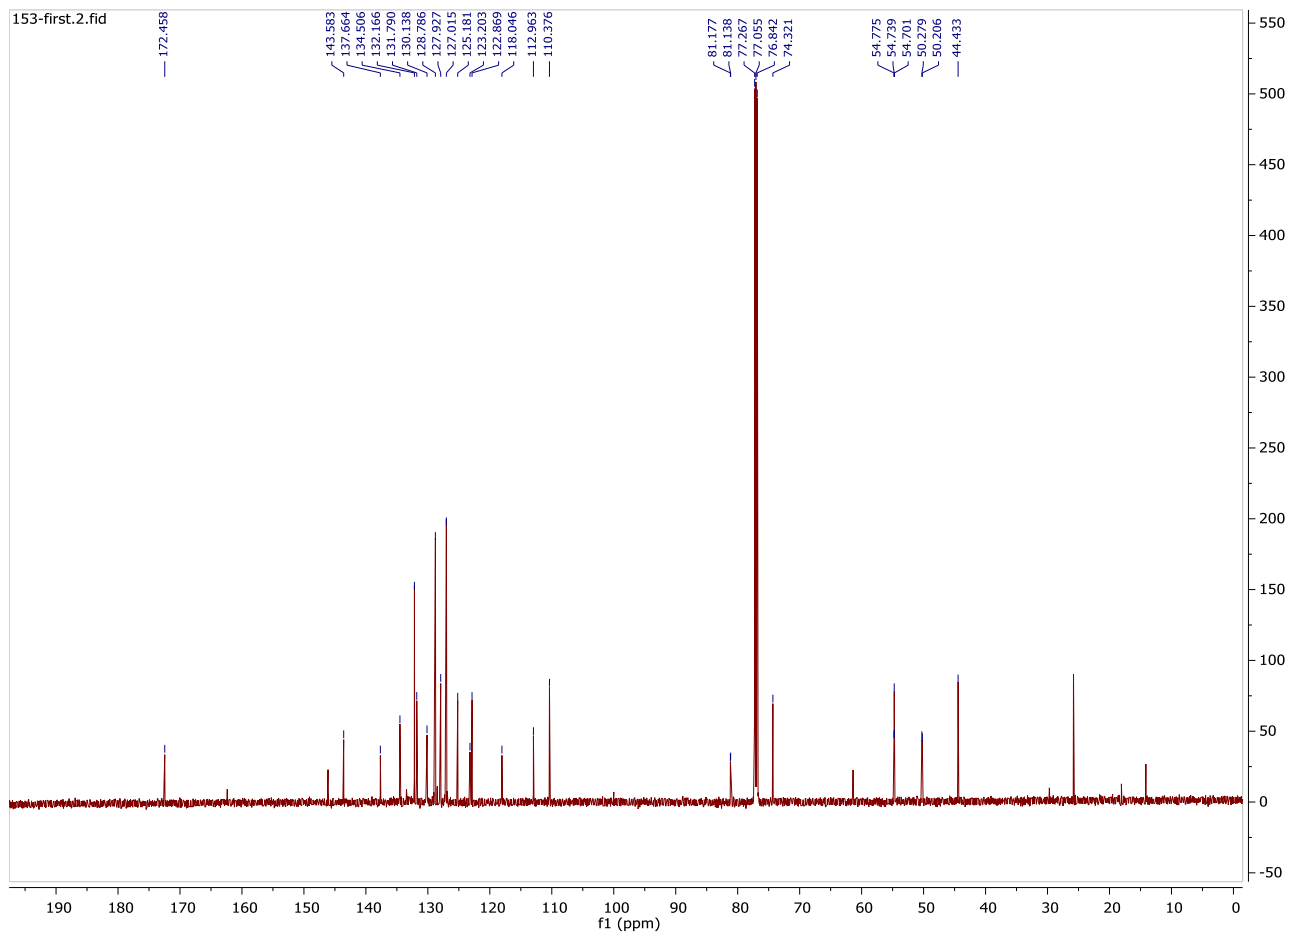

**$^{13}\text{C}$  NMR of 4ad (2<sup>nd</sup> diastereomer)**

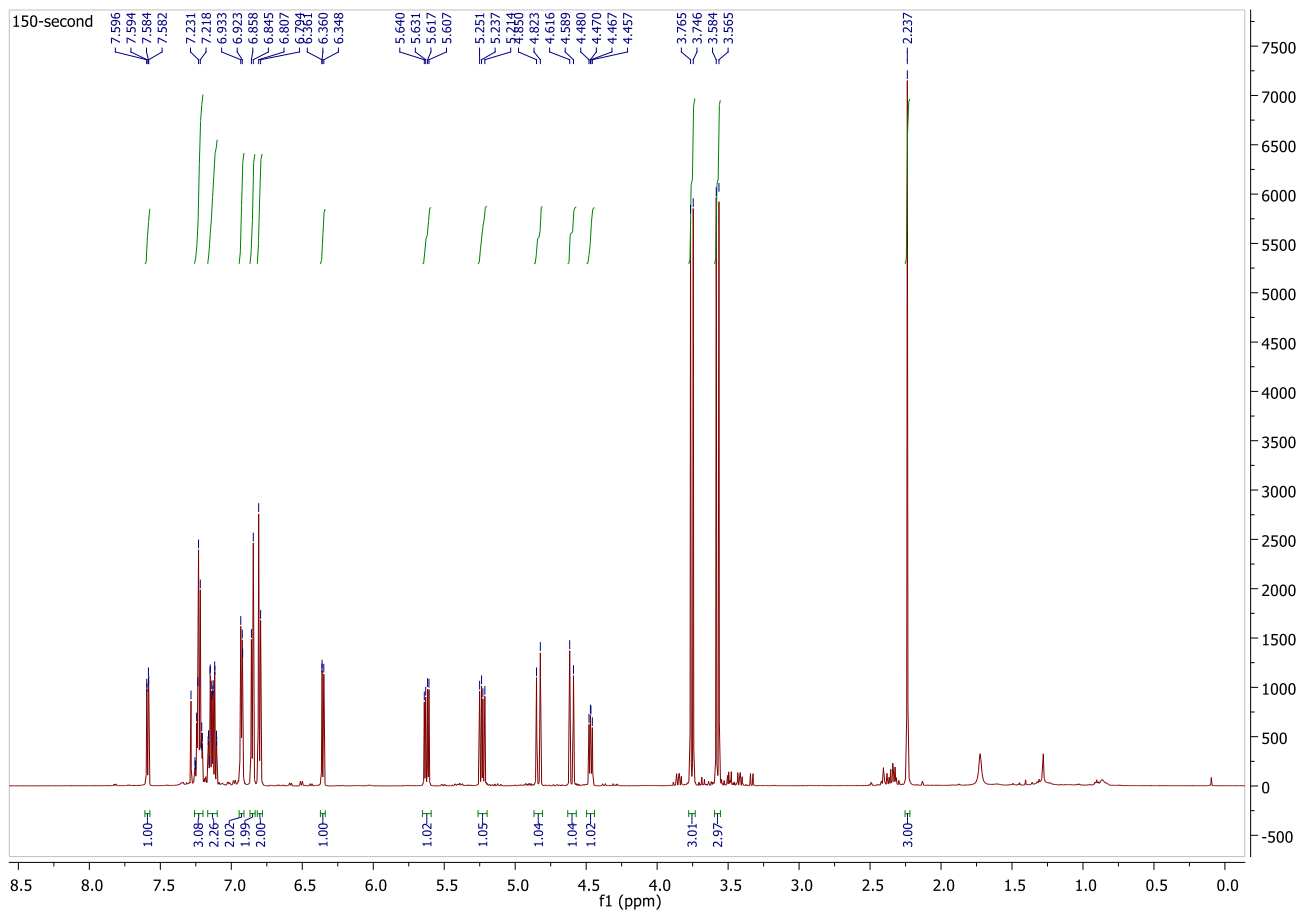

<sup>1</sup>H NMR of 4ae

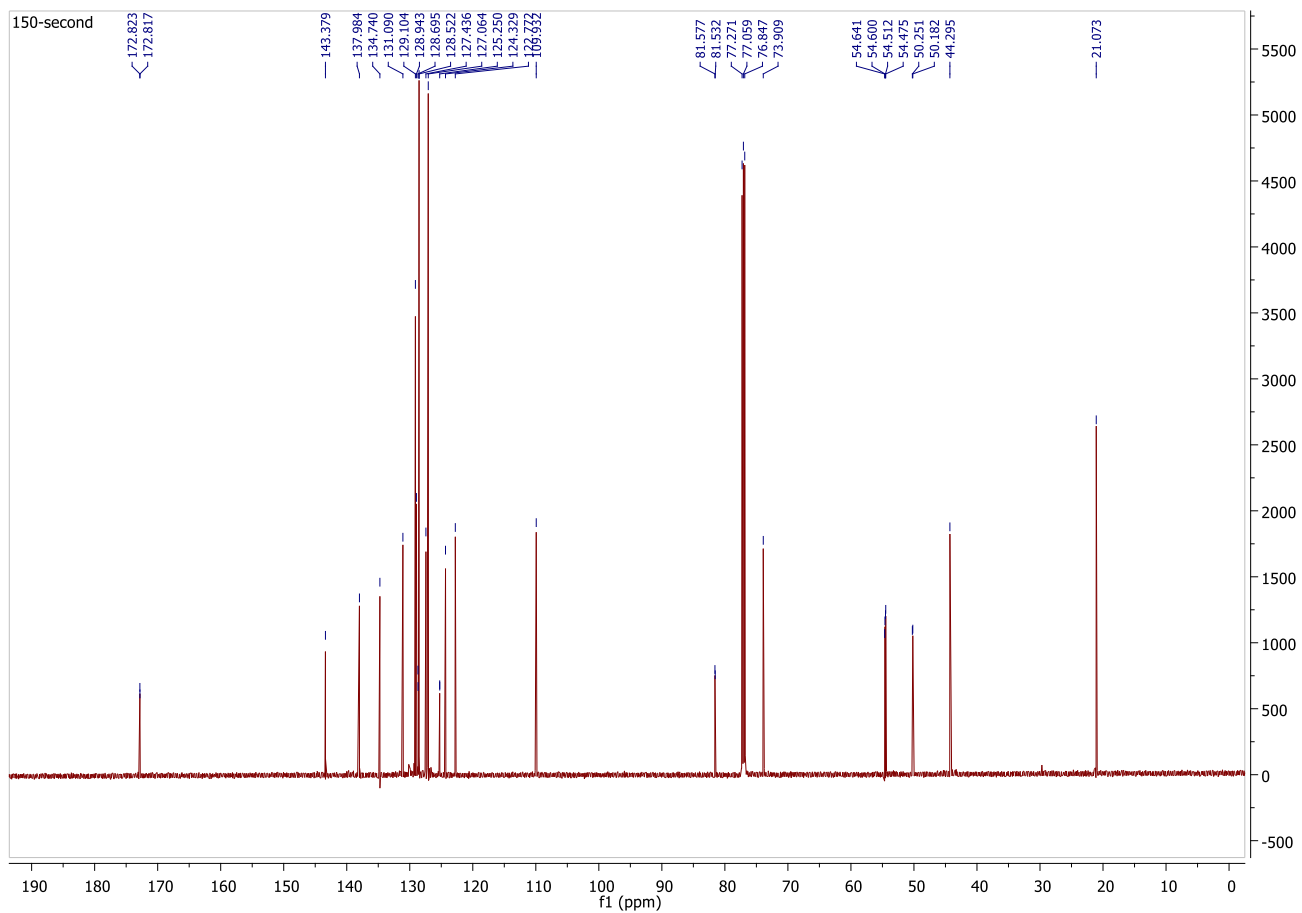

$^{13}\text{C}$  NMR of 4ae

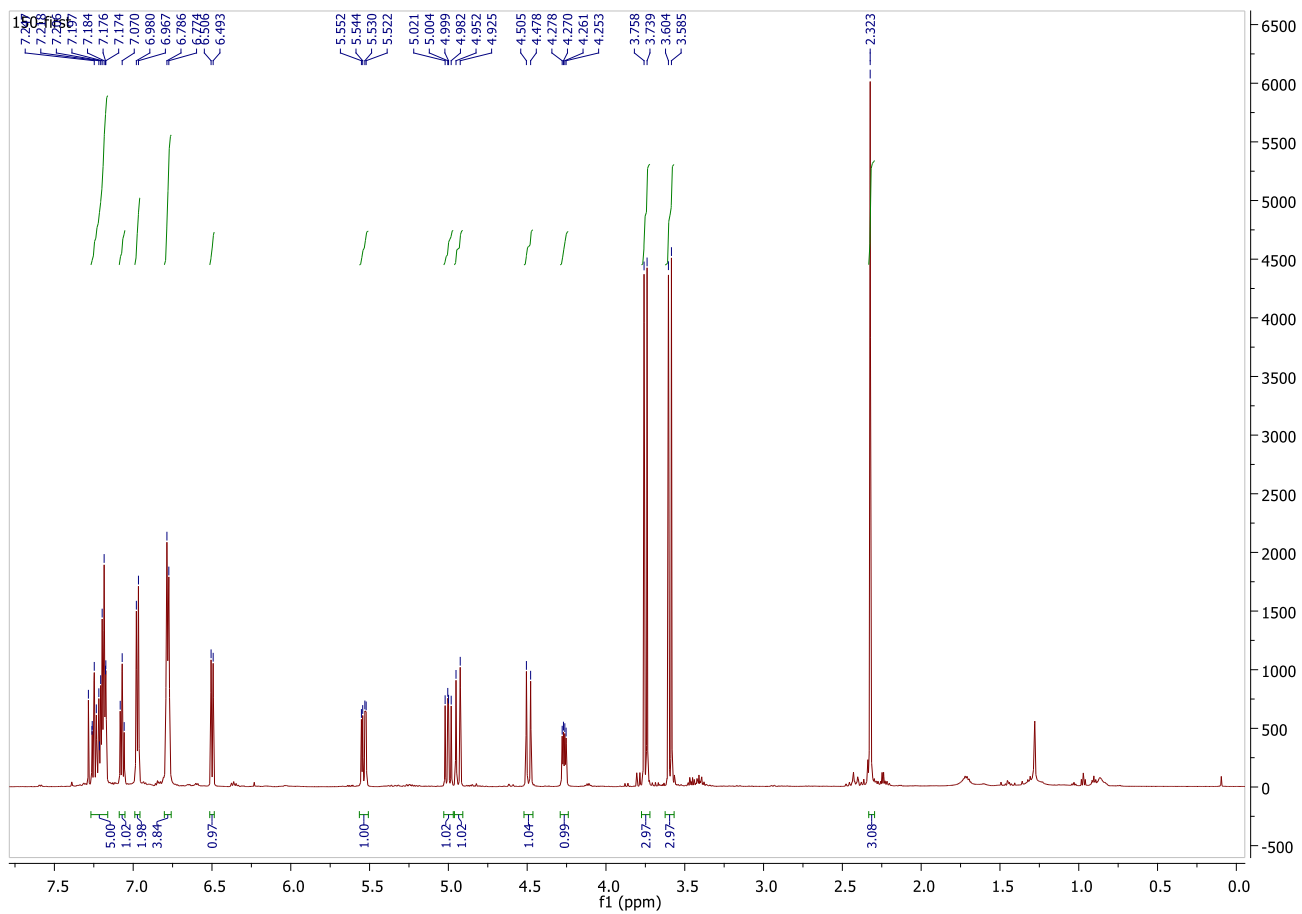

**<sup>1</sup>H NMR of 4ae (2<sup>nd</sup> diastereomer)**

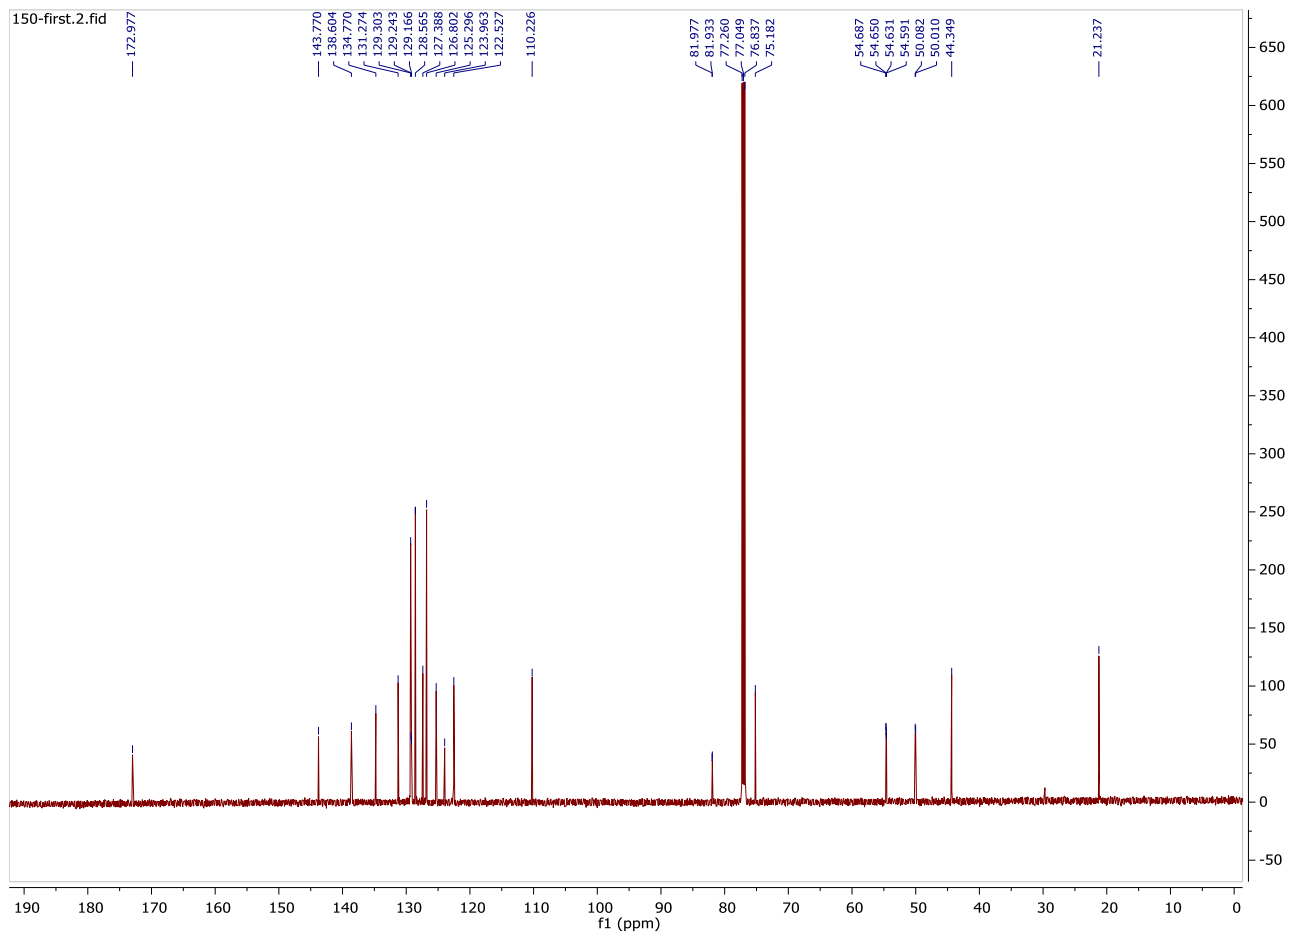

$^{13}\text{C}$  NMR of 4ae (2<sup>nd</sup> diastereomer)



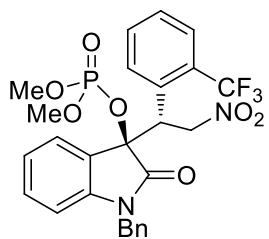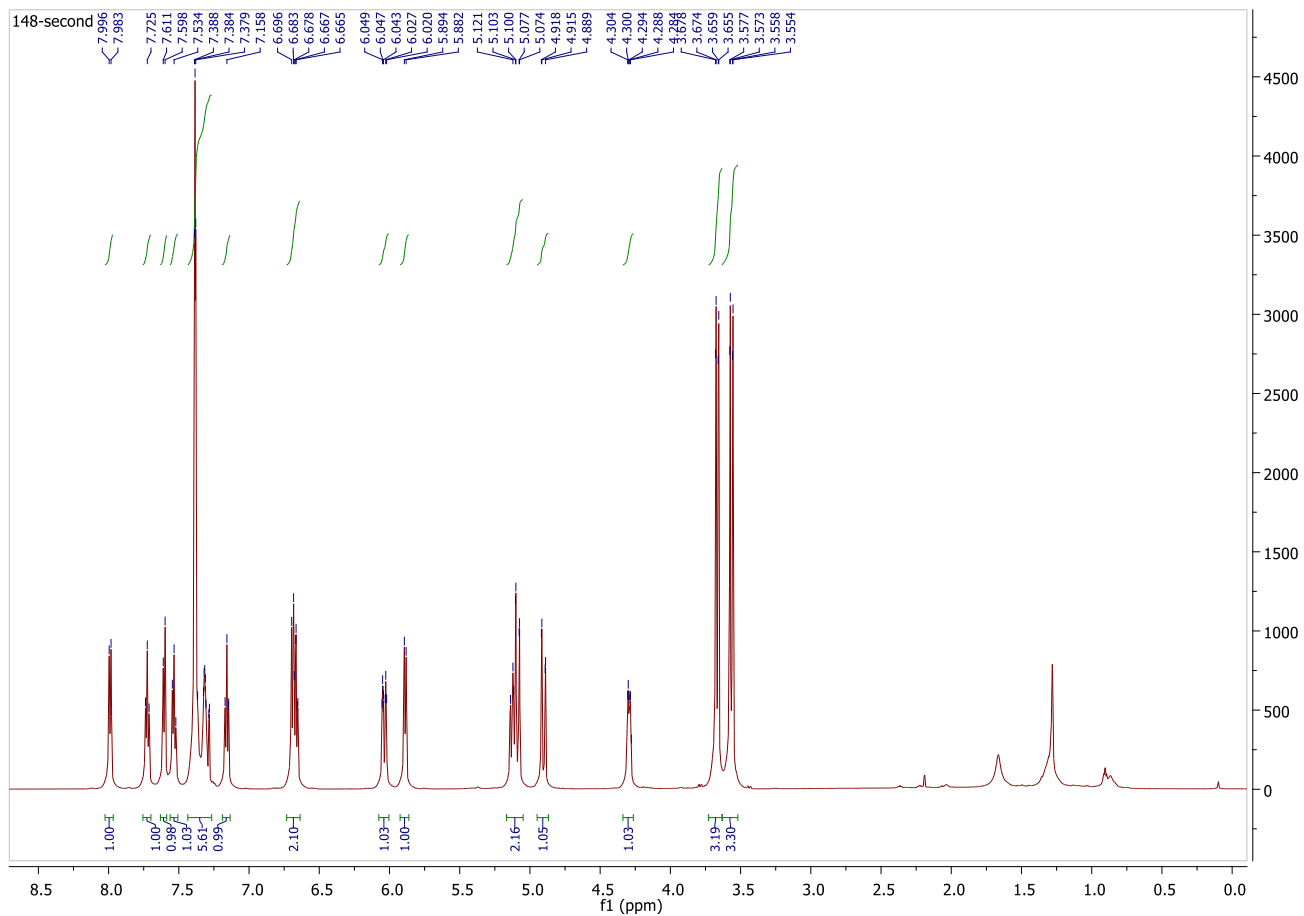

<sup>1</sup>H NMR of 4af

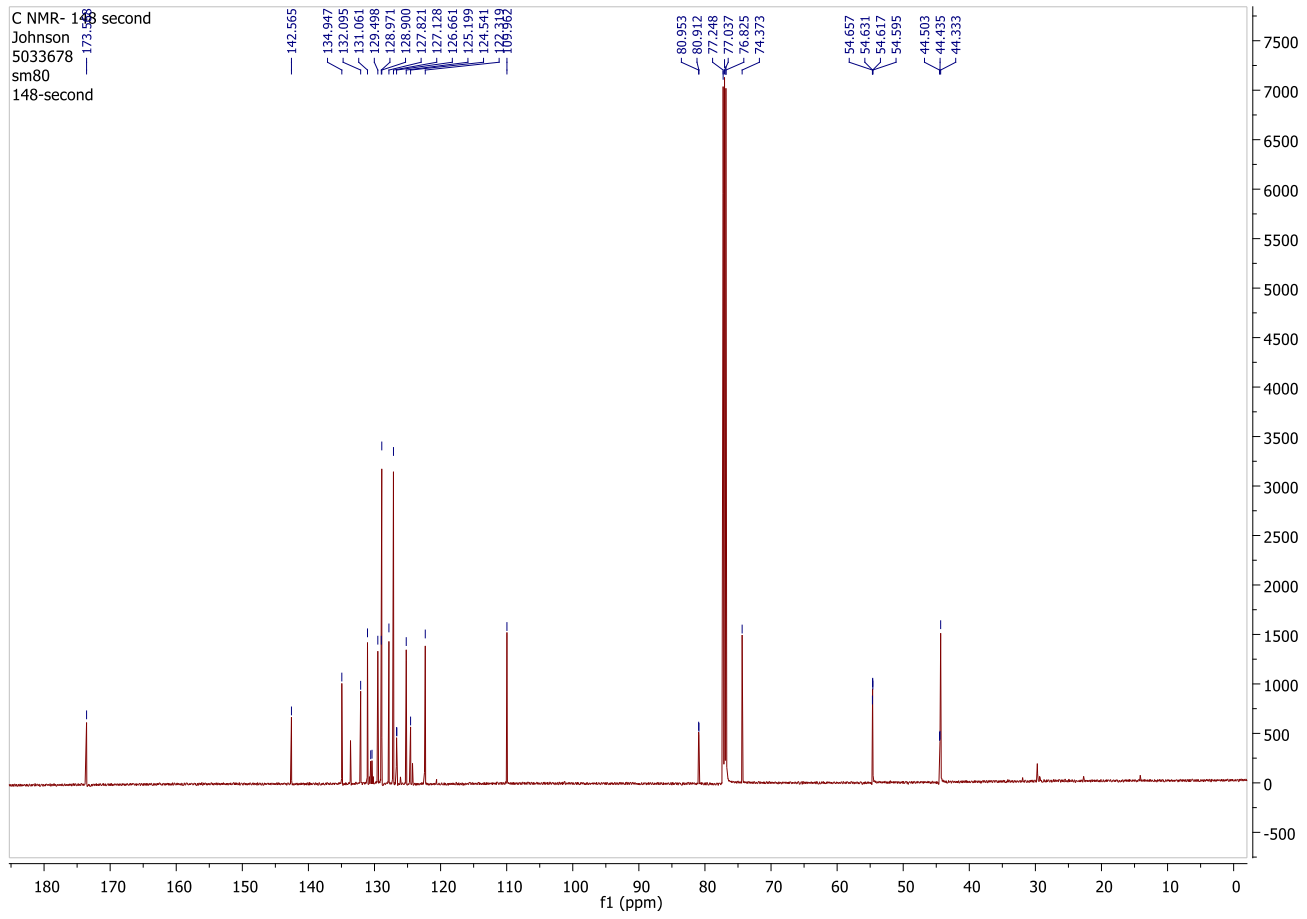

<sup>13</sup>C NMR of 4af

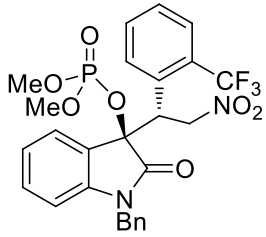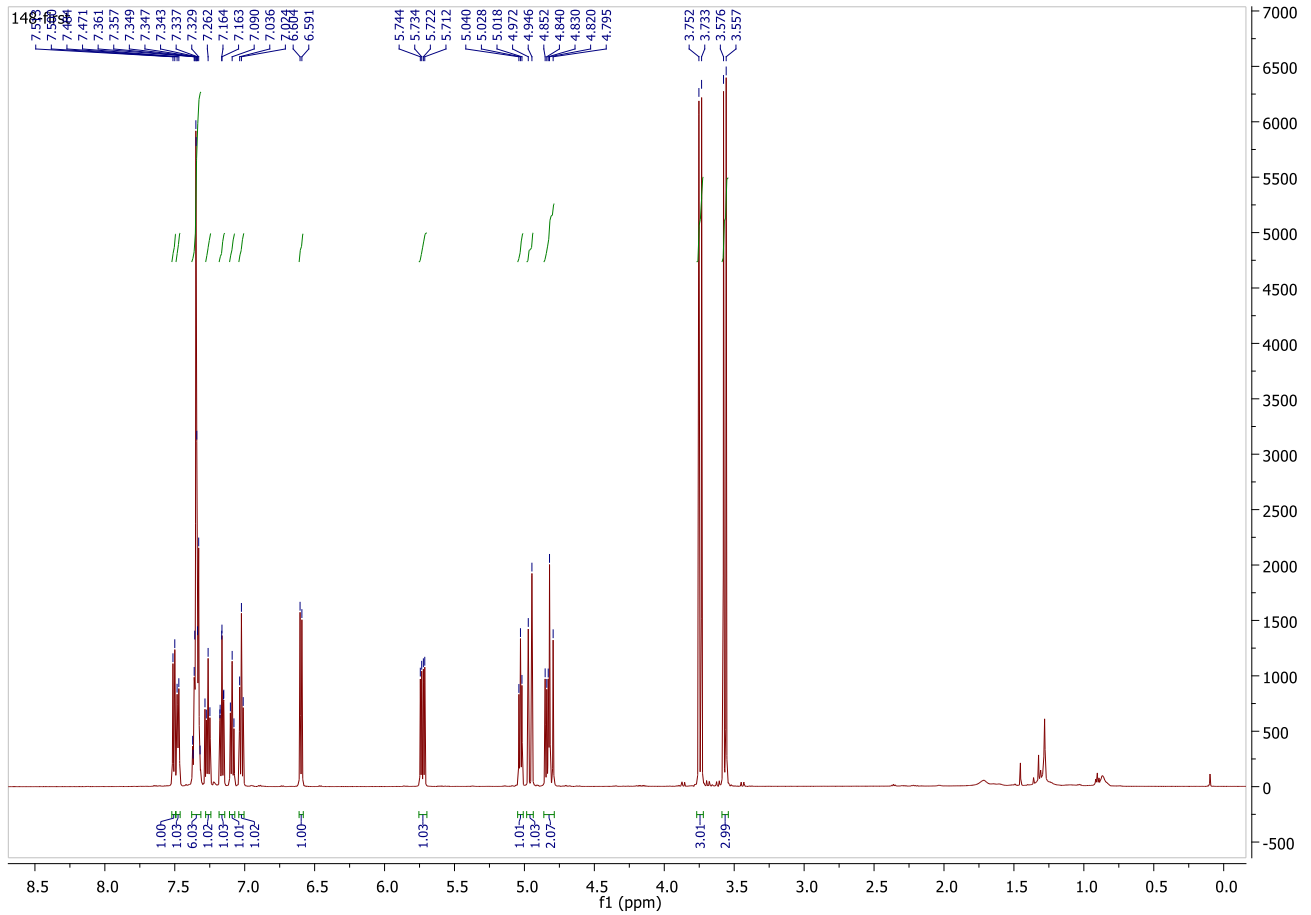

**<sup>1</sup>H NMR of 4af (2<sup>nd</sup> diastereomer)**

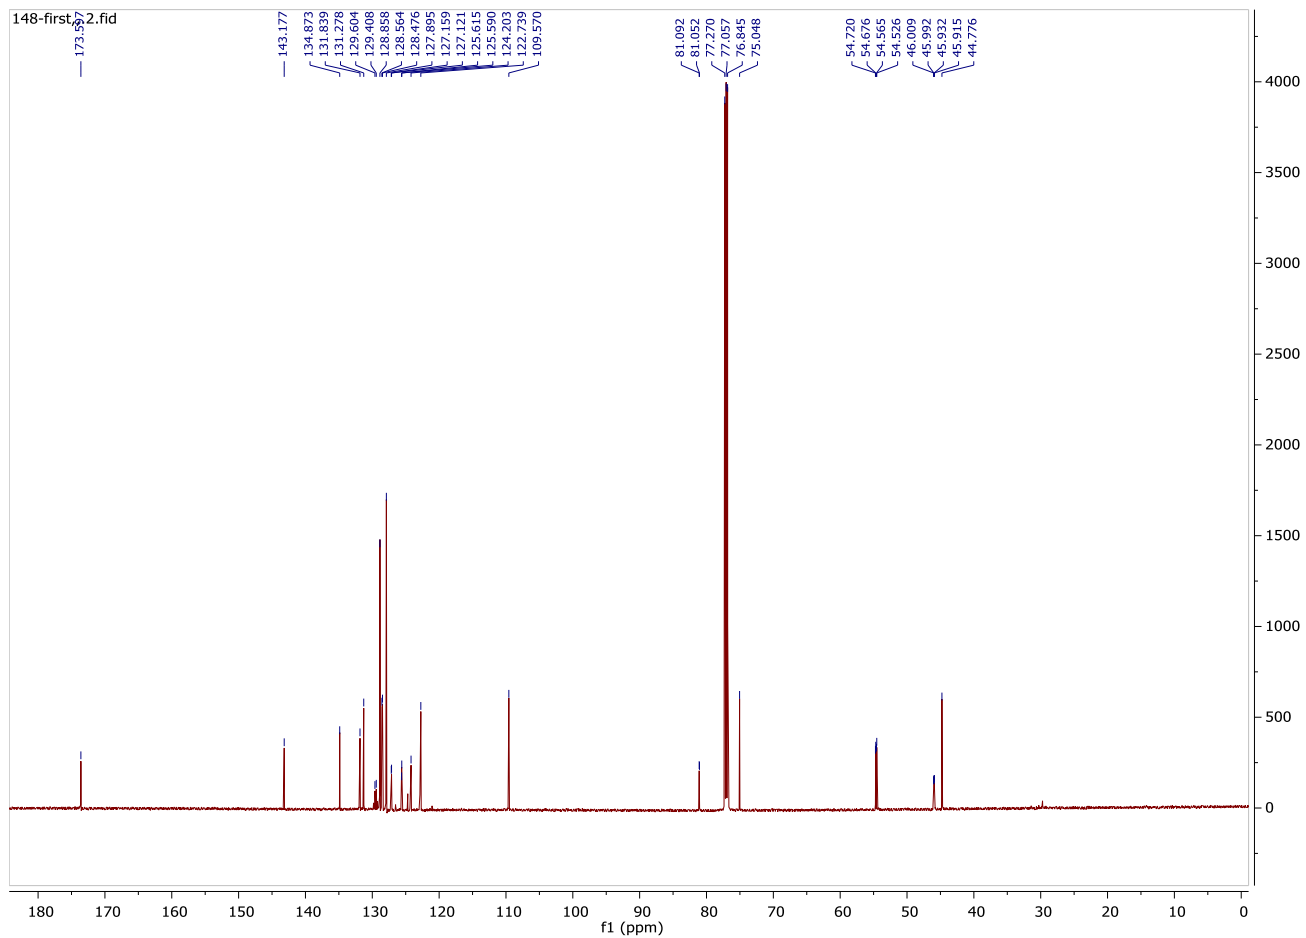

**$^{13}\text{C}$  NMR of 4af (2<sup>nd</sup> diastereomer)**

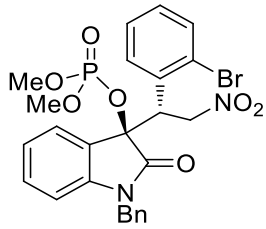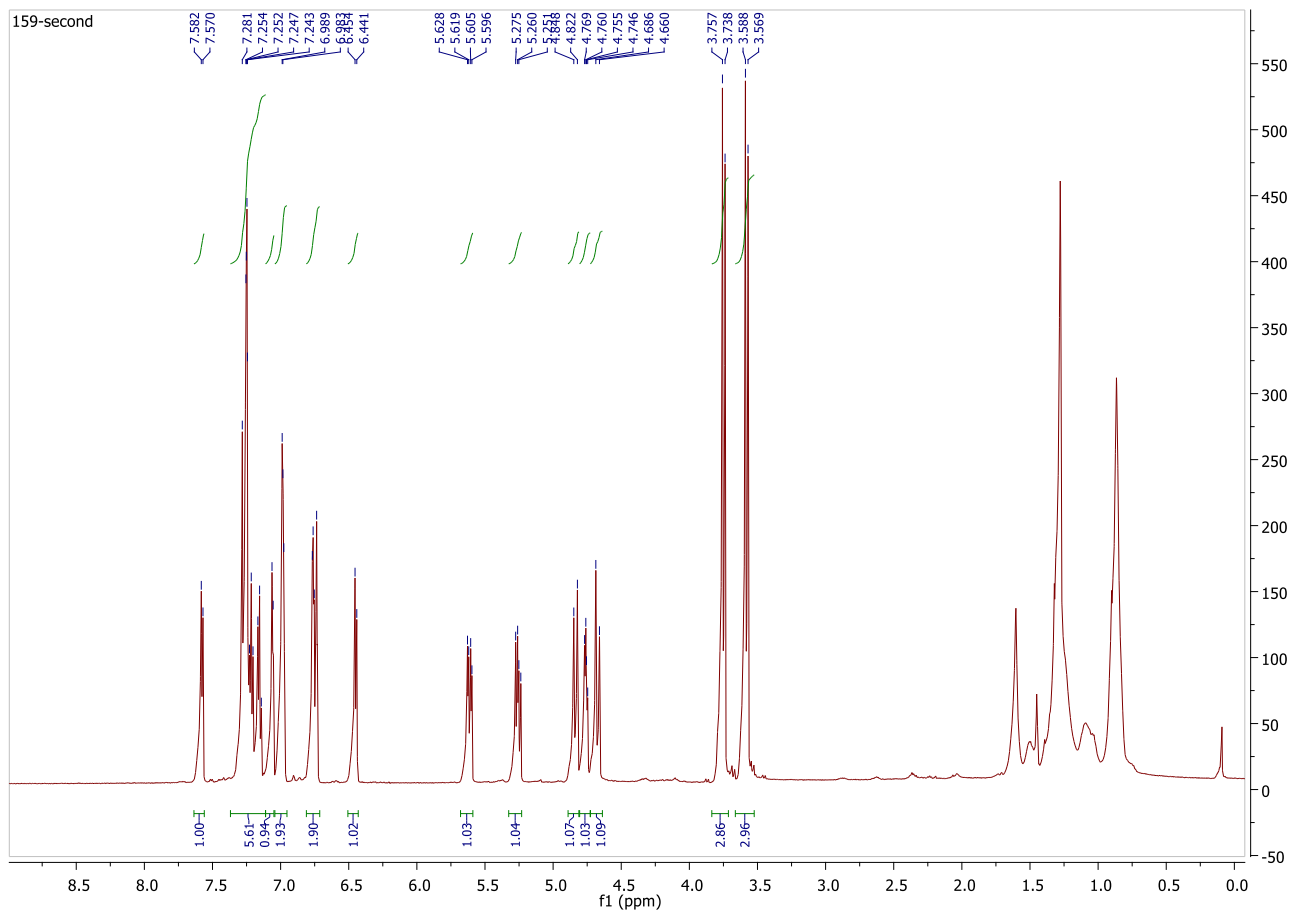

**<sup>1</sup>H NMR of 4ag**

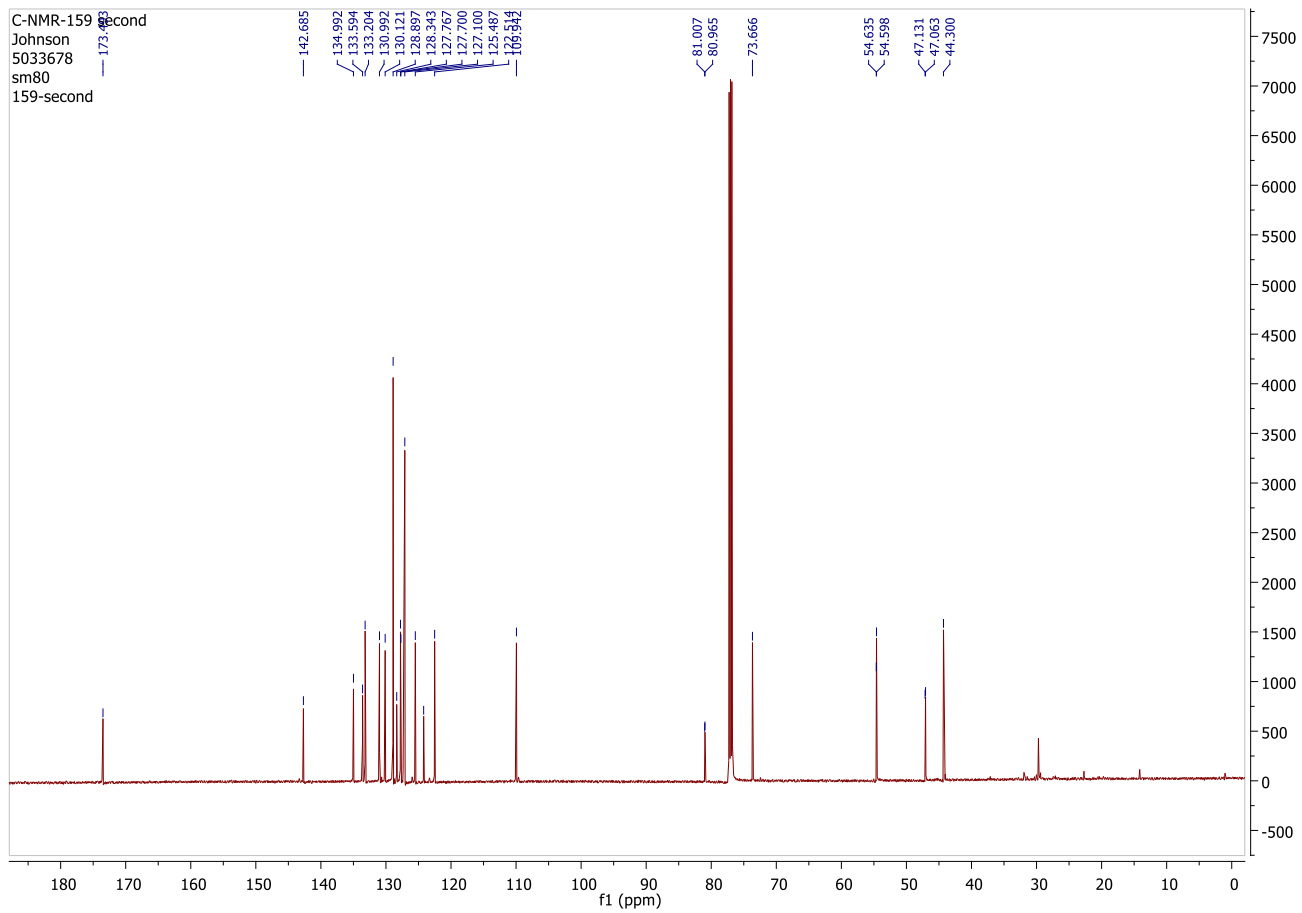

**$^{13}\text{C}$  NMR of 4ag**

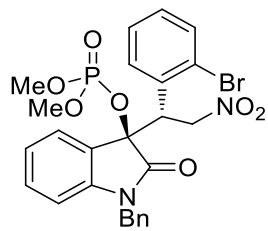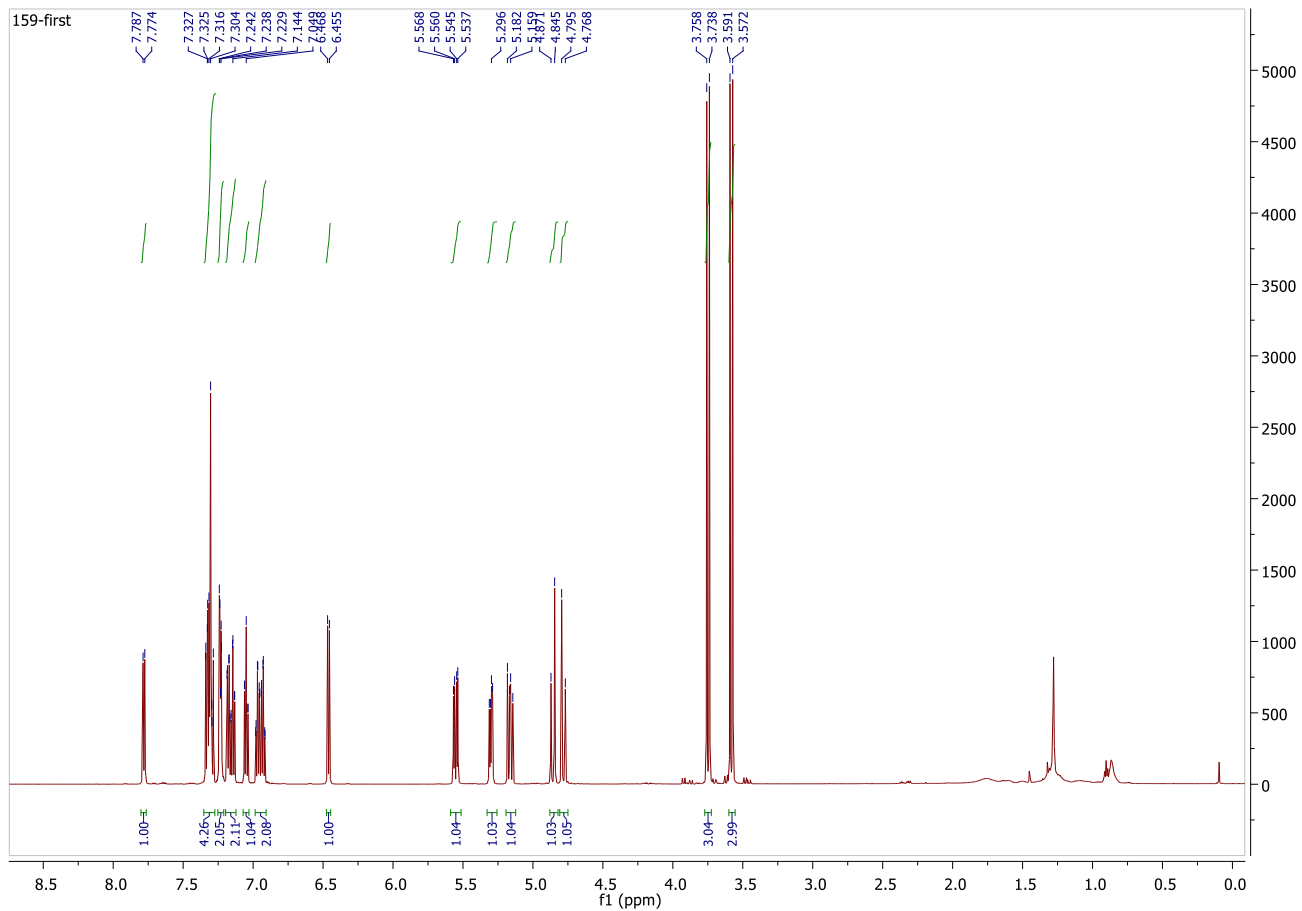

<sup>1</sup>H NMR of 4ag (2<sup>nd</sup> diastereomer)

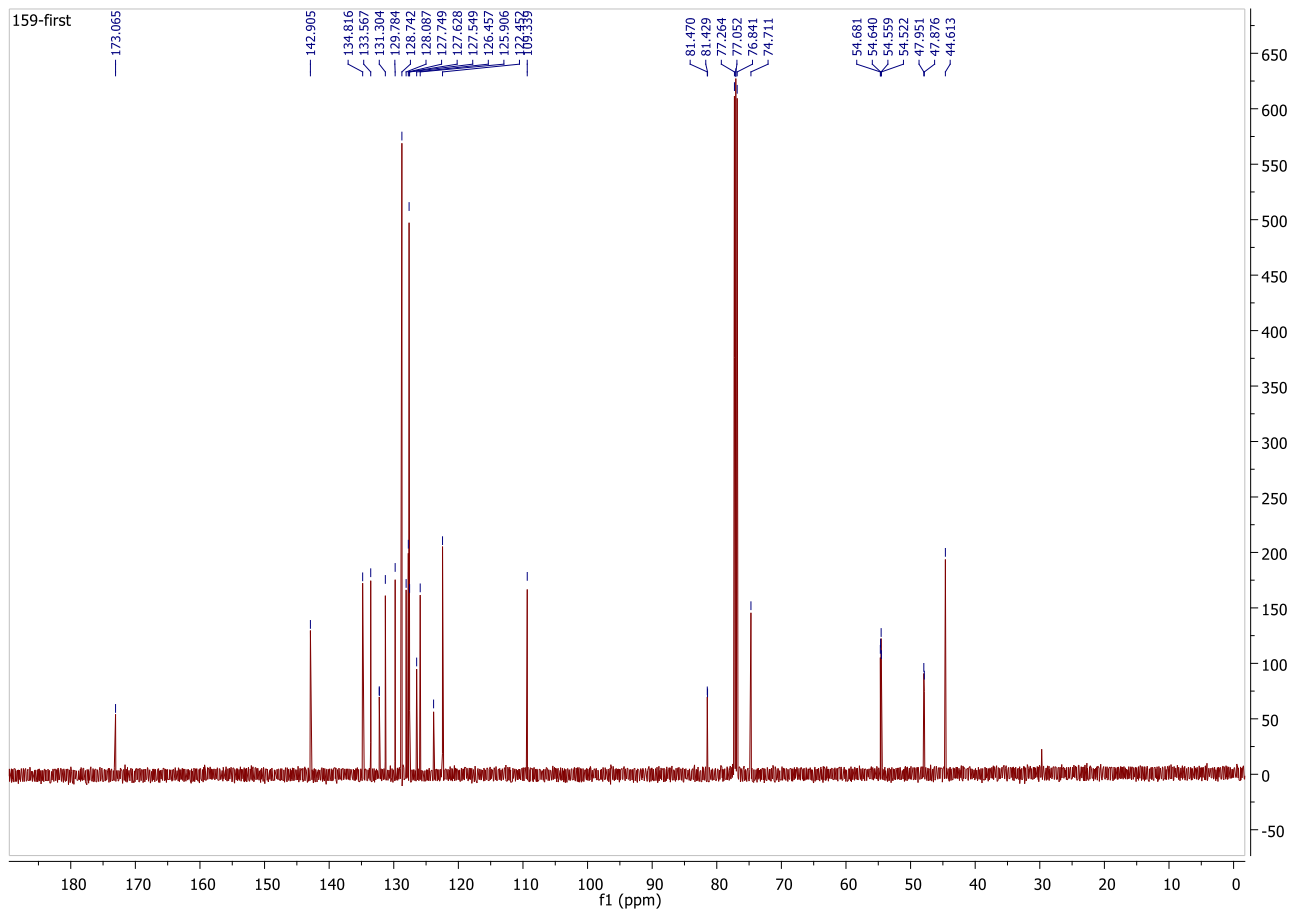

**$^{13}\text{C}$  NMR of 4ag (2<sup>nd</sup> diastereomer)**



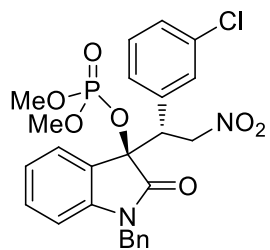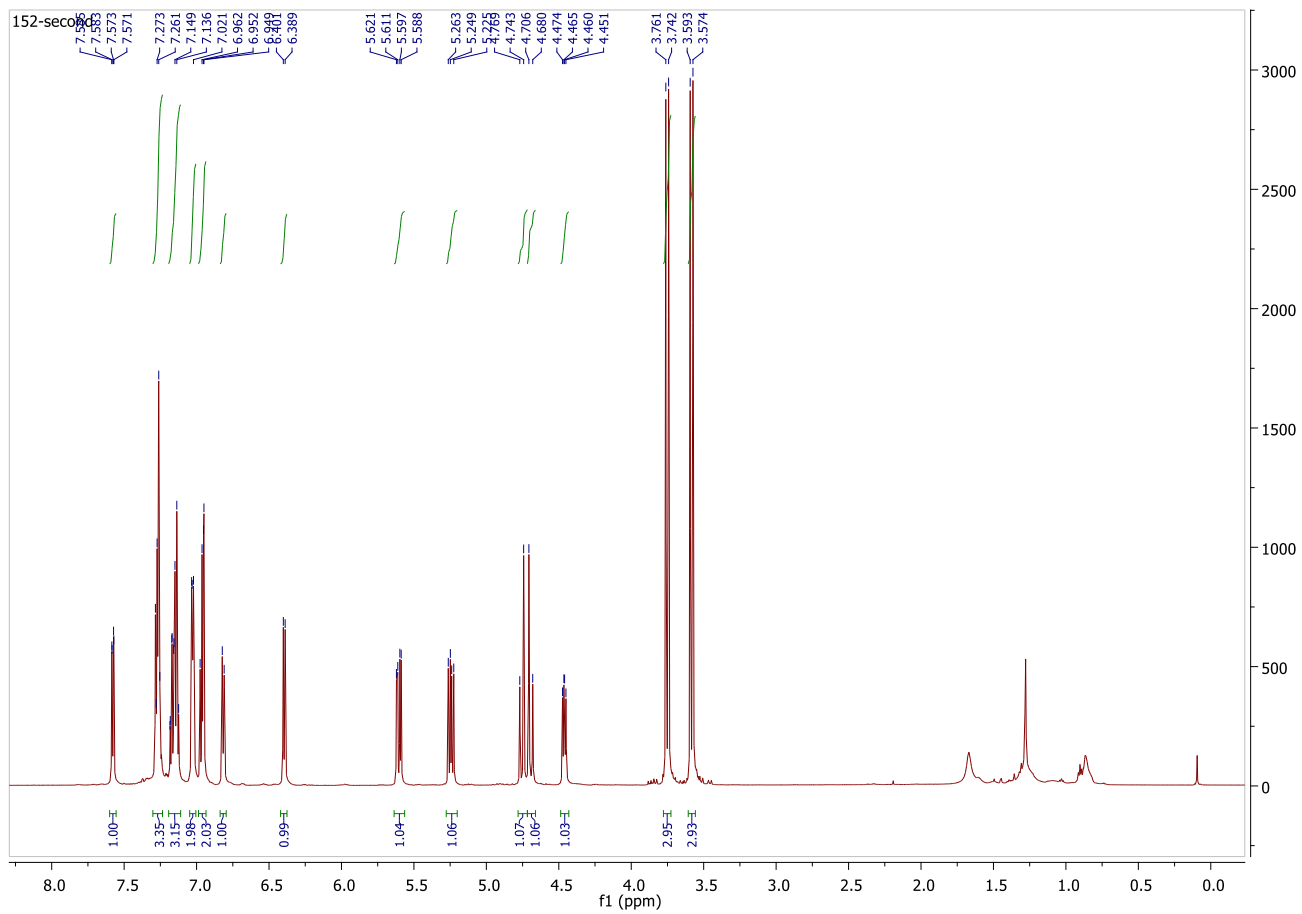

<sup>1</sup>H NMR of 4ah

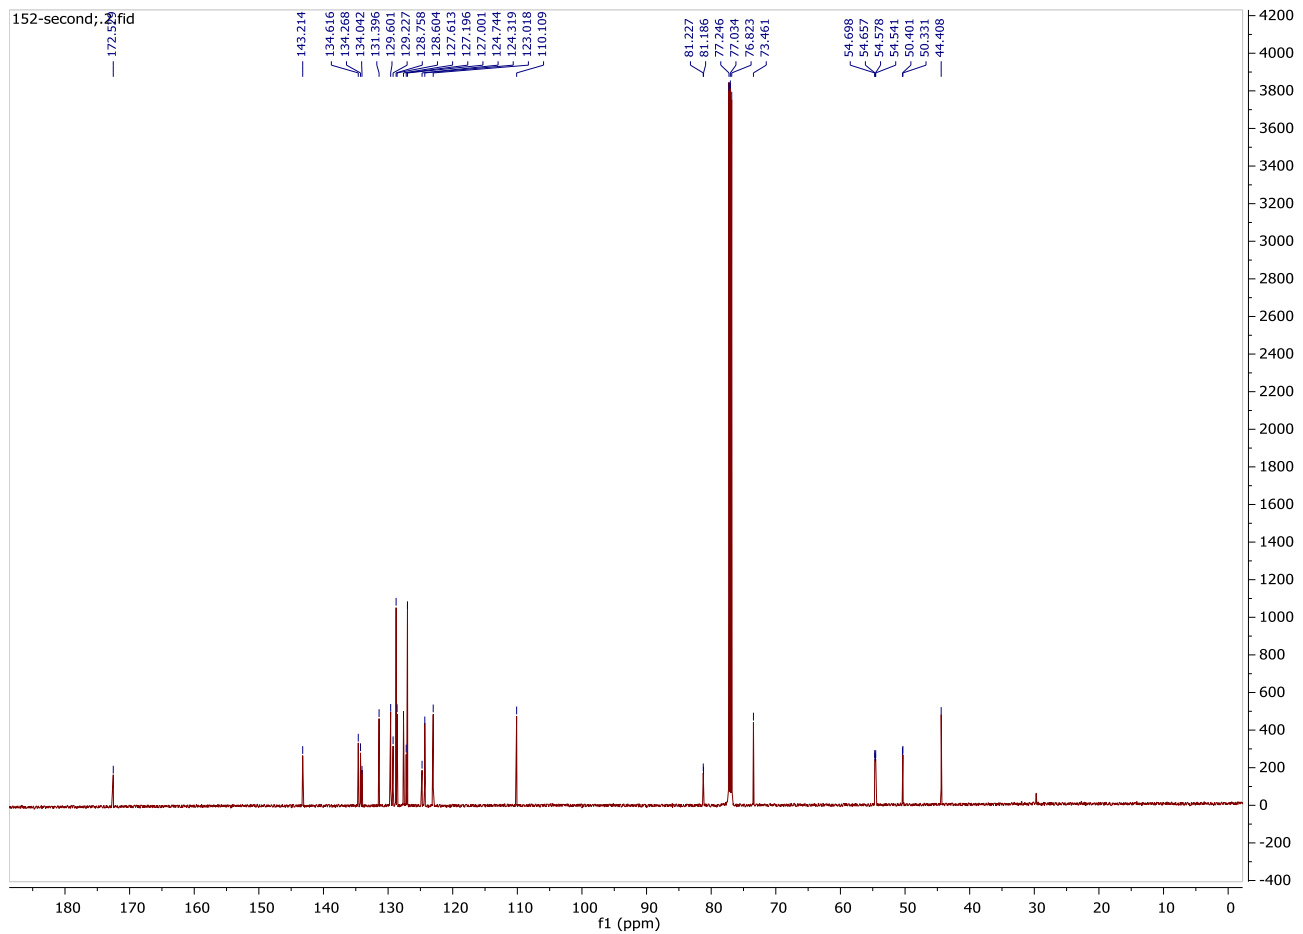

**$^{13}\text{C}$  NMR of 4ah**

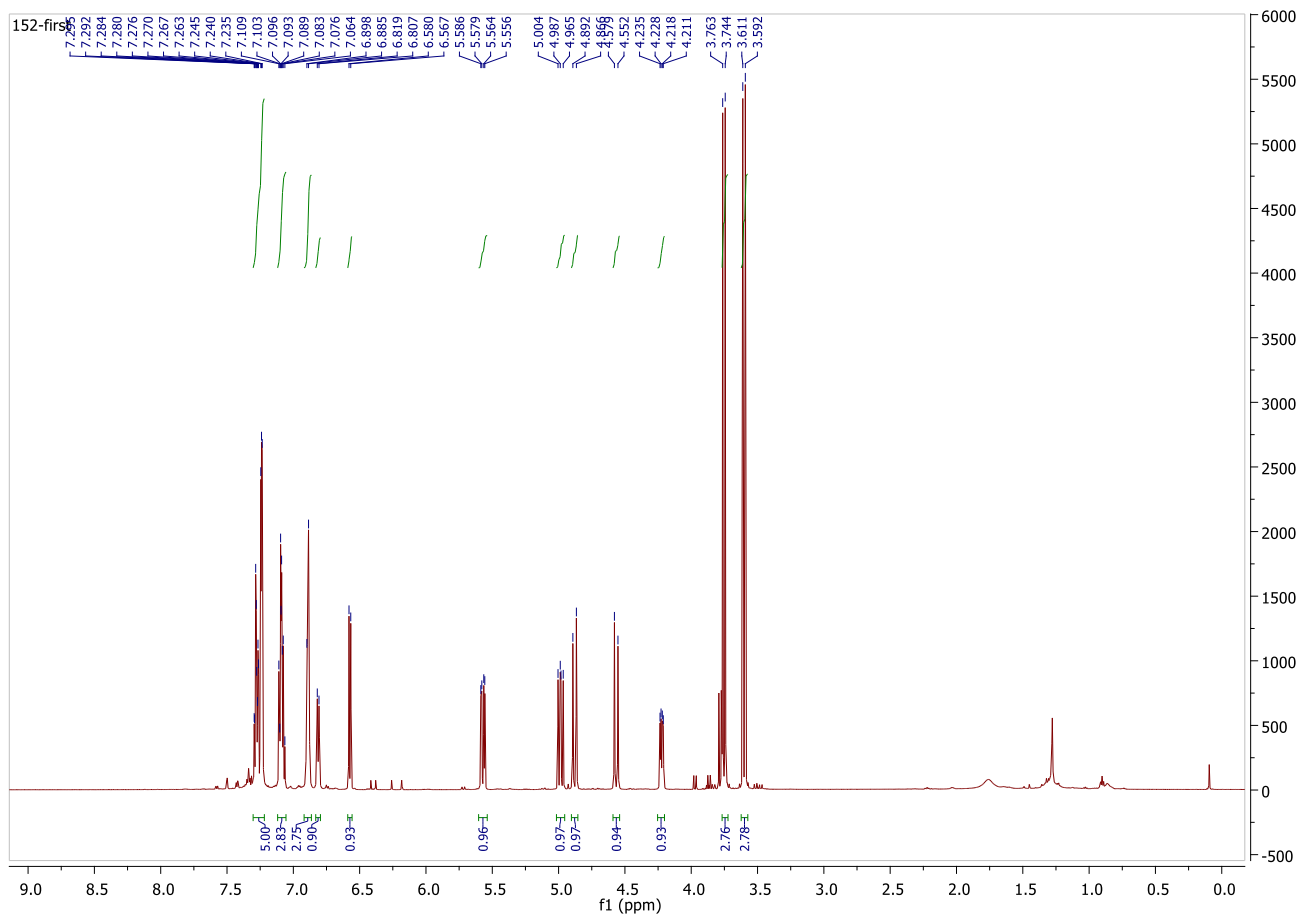

**<sup>1</sup>H NMR of 4h (2<sup>nd</sup> diastereomer)**

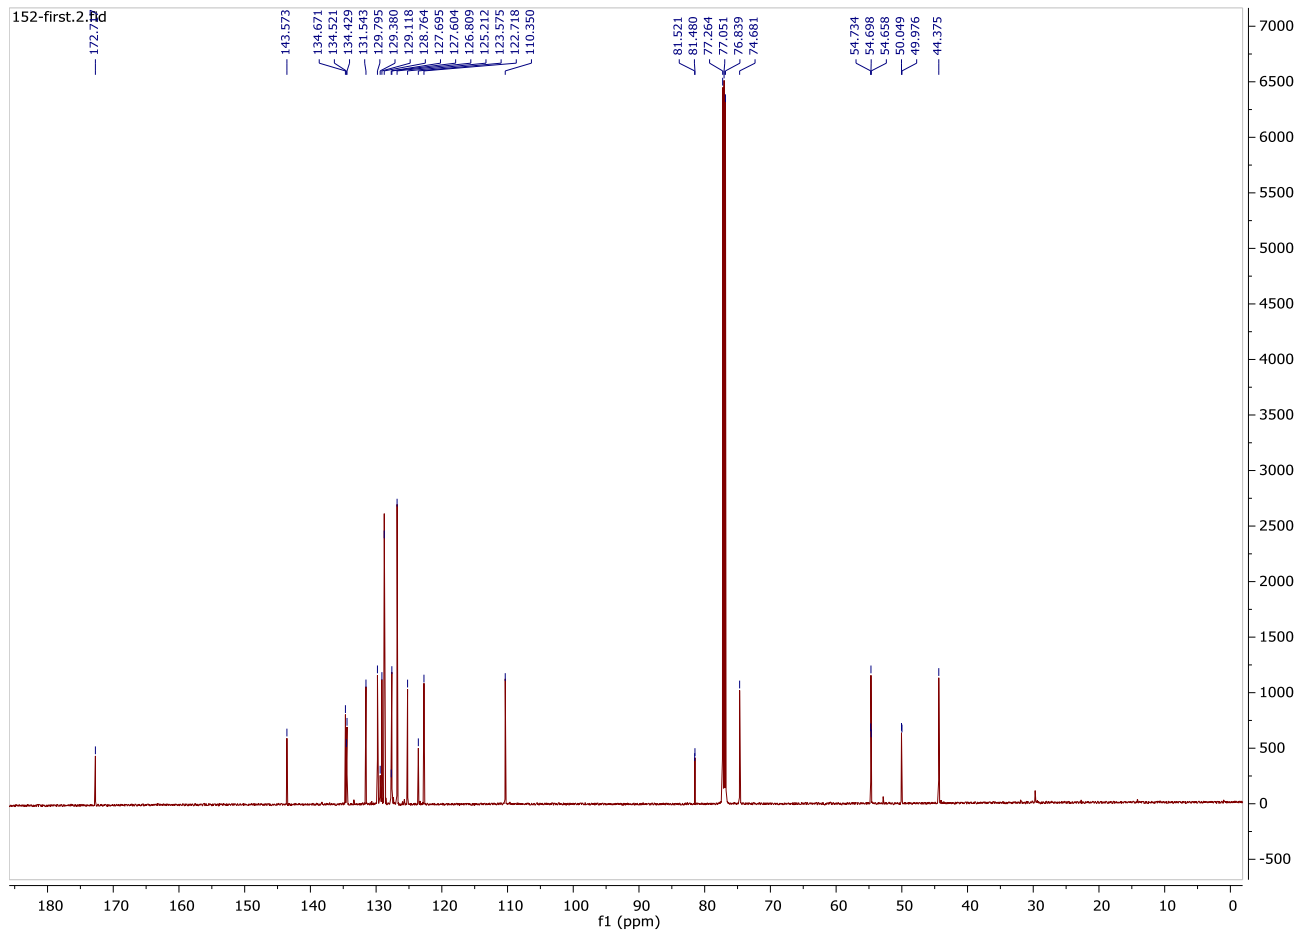

**<sup>13</sup>C NMR of 4ah (2<sup>nd</sup> diastereomer)**

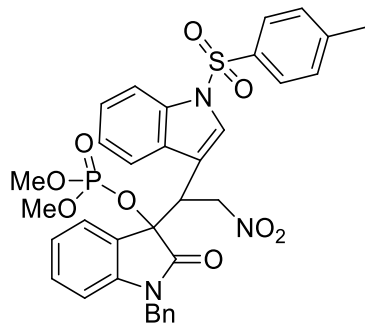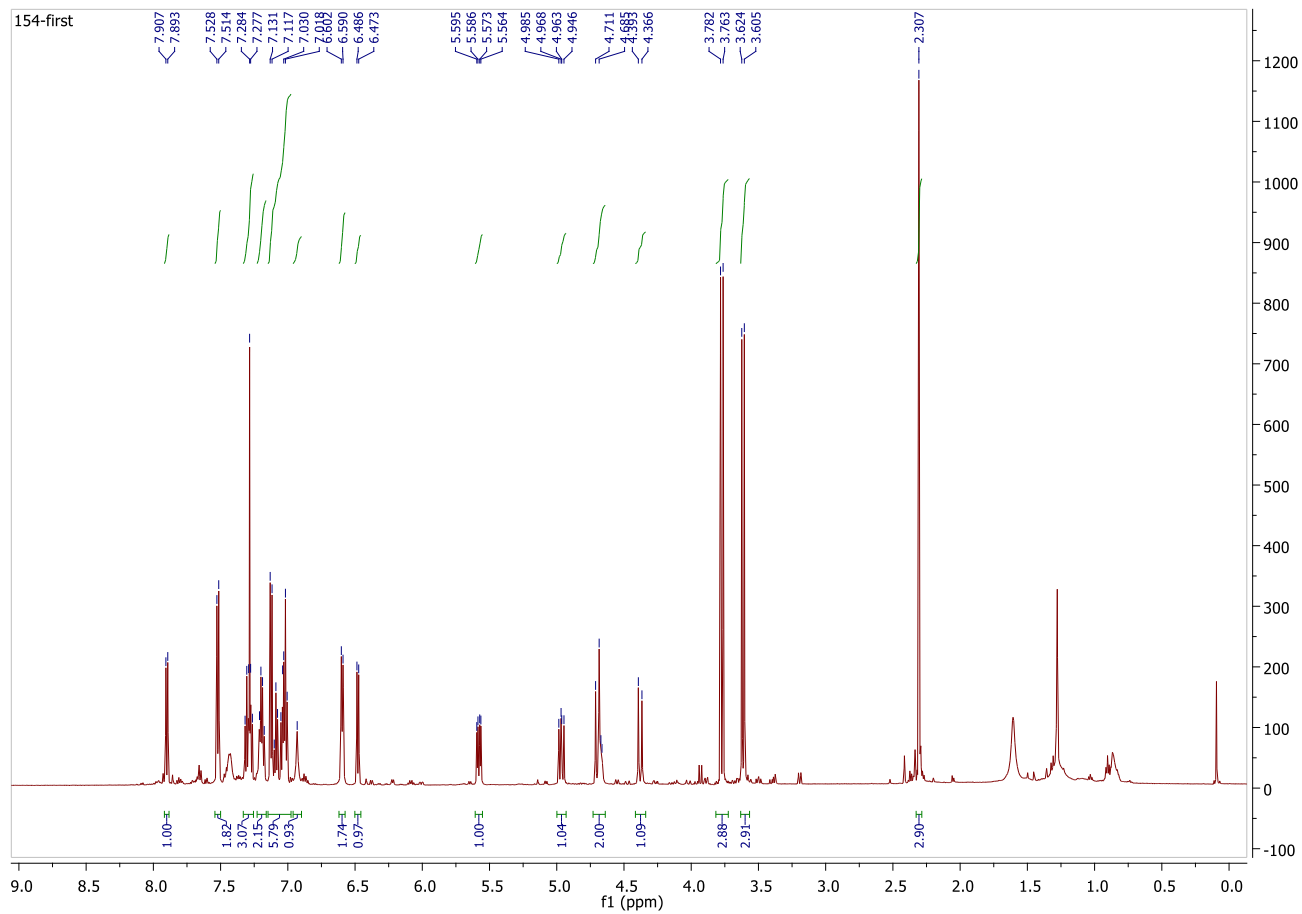

**<sup>1</sup>H NMR of 4ai**

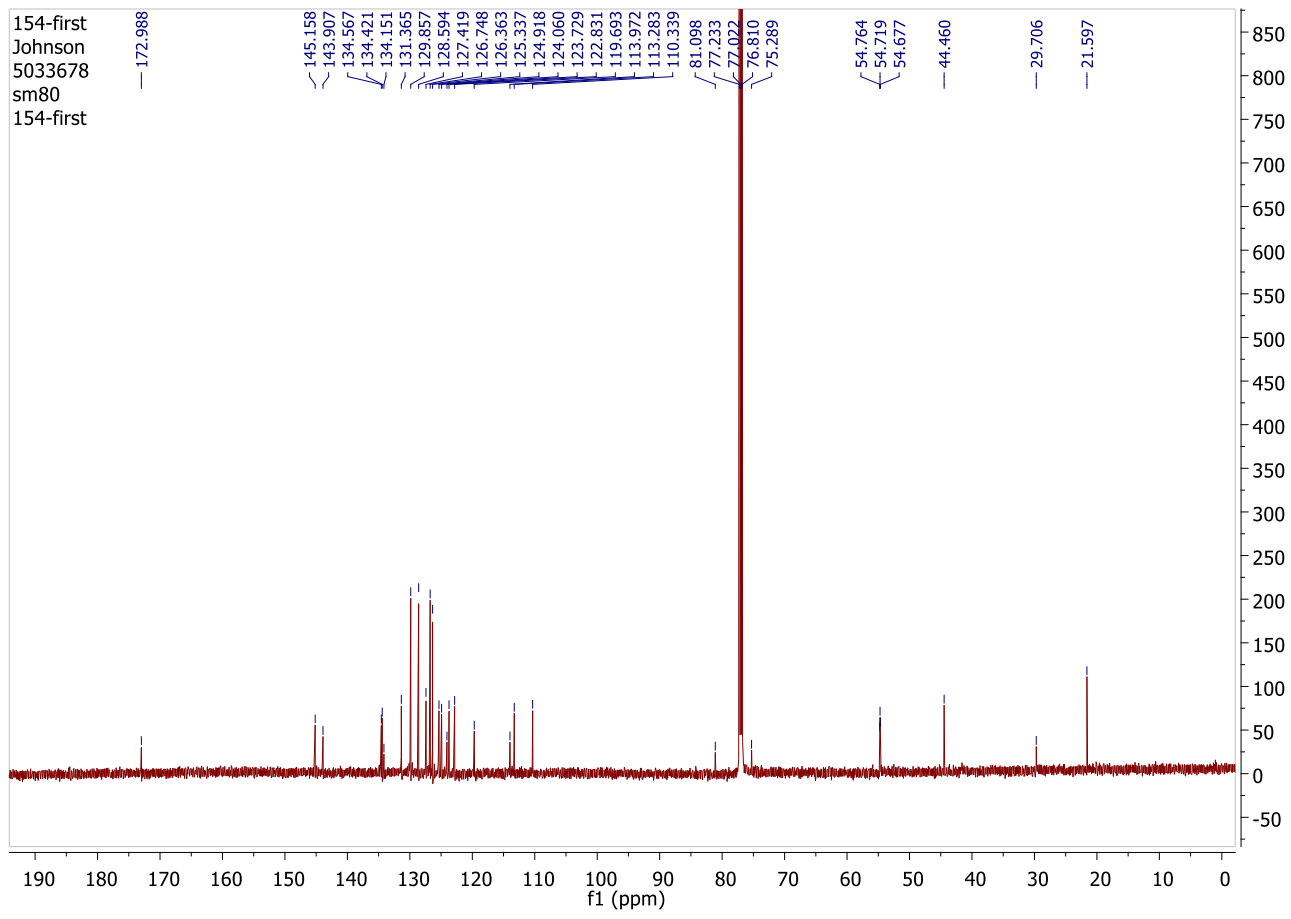

<sup>13</sup>C NMR of 4ai

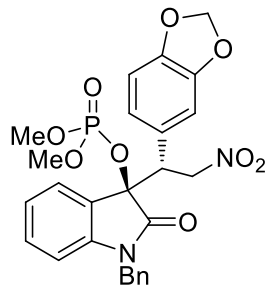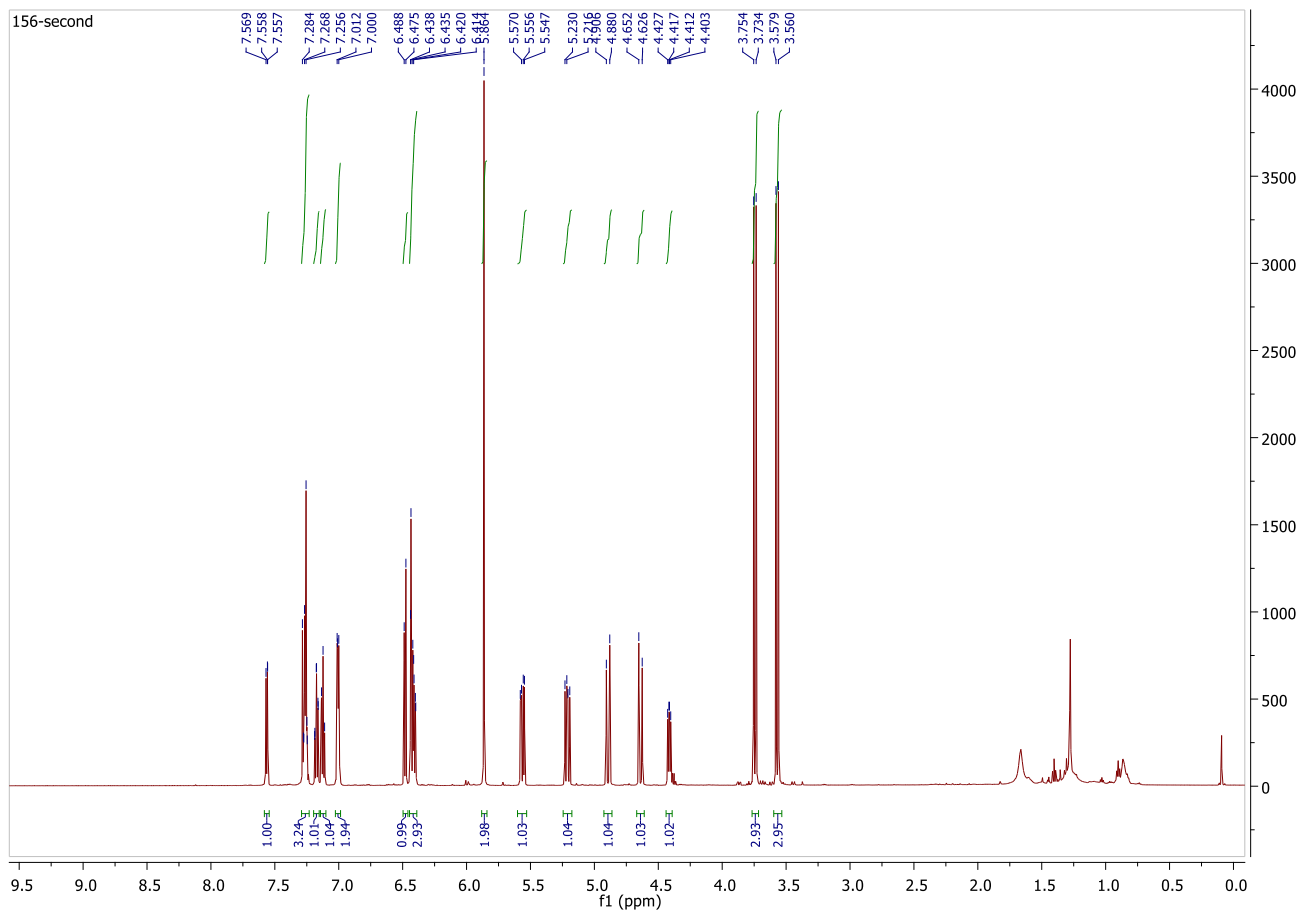

<sup>1</sup>H NMR of 4aj

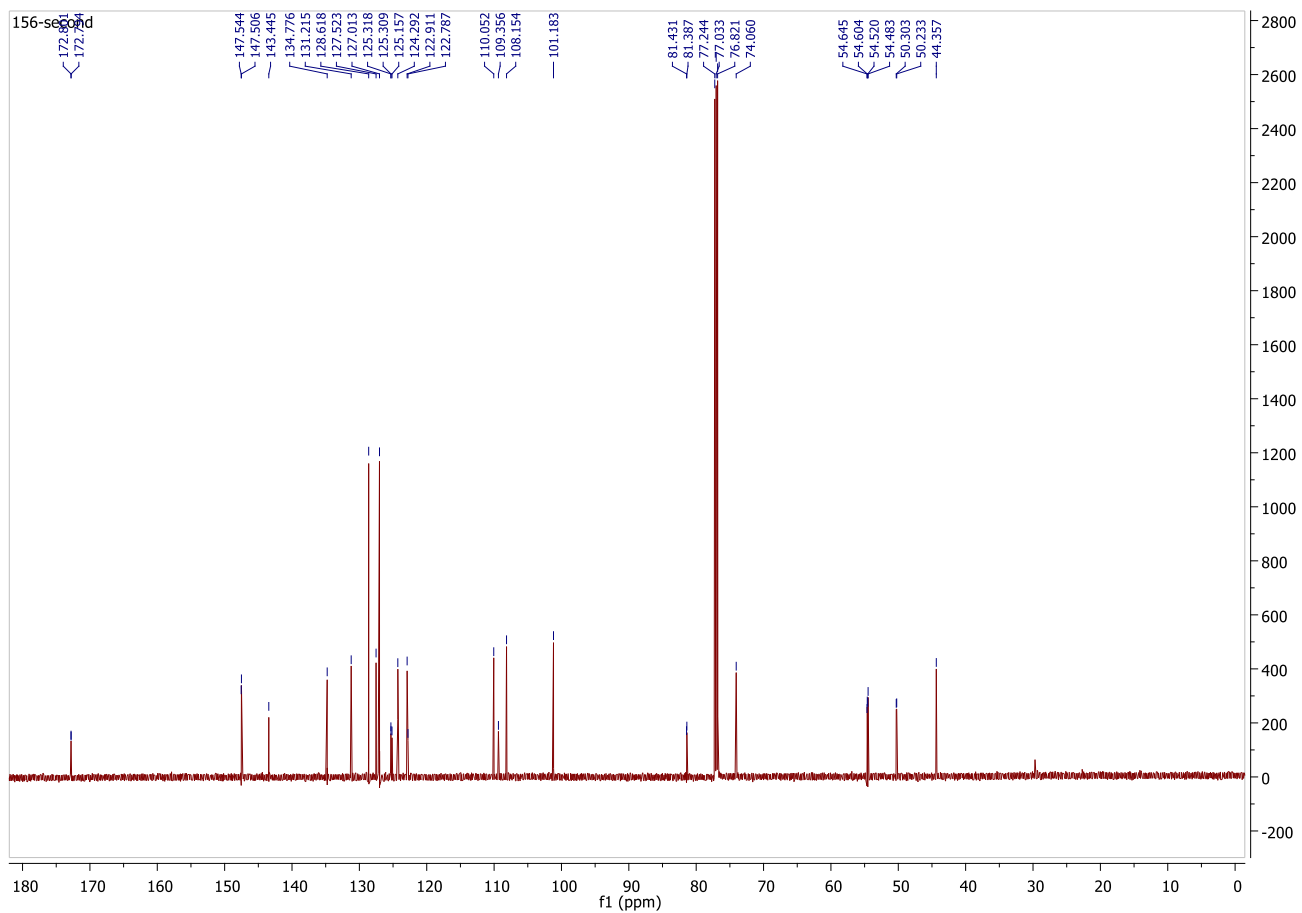

$^{13}\text{C}$  NMR of 4aj



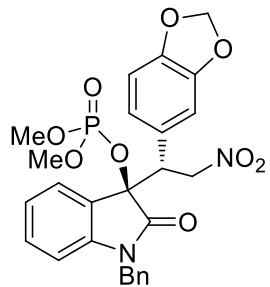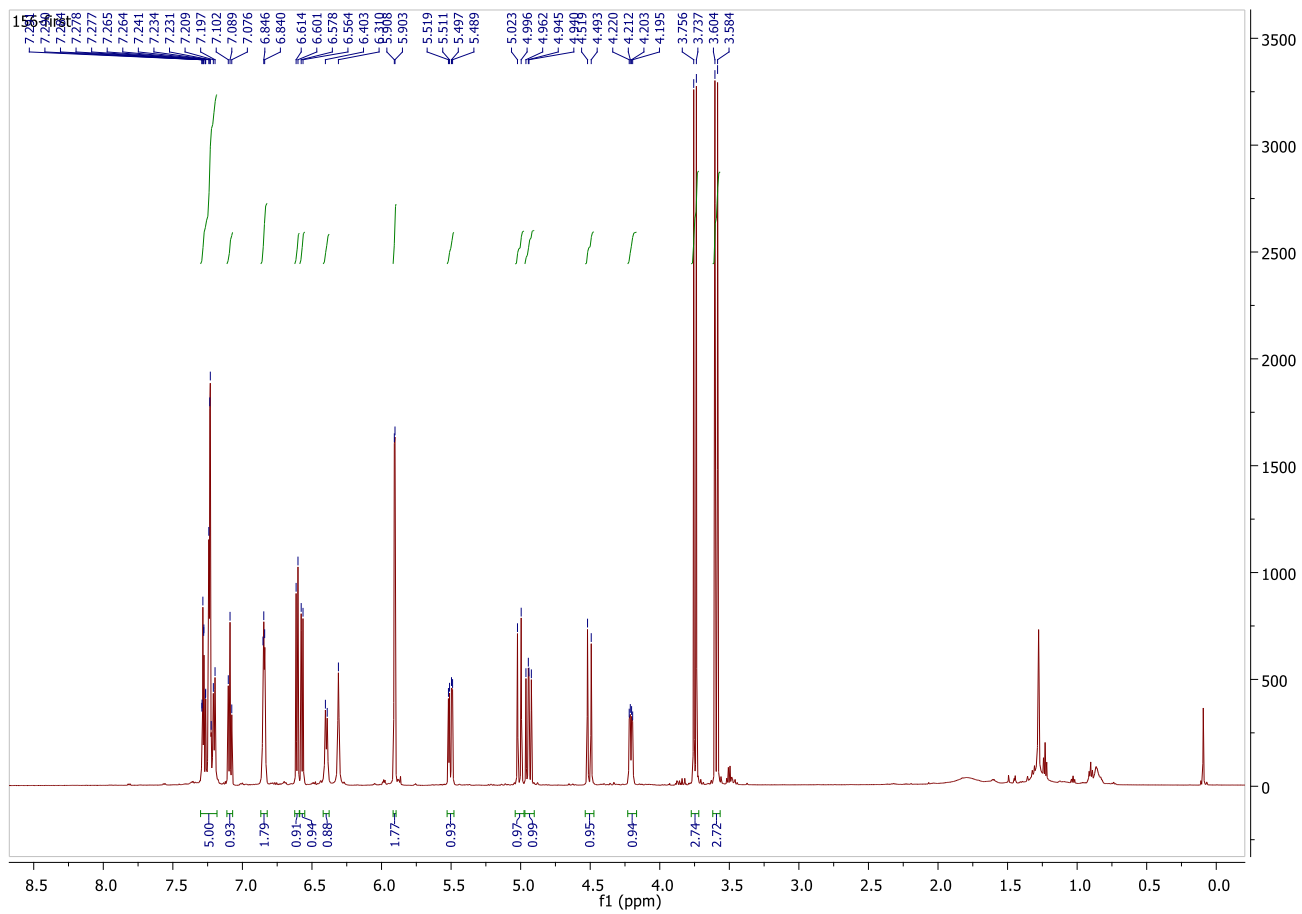

**<sup>1</sup>H NMR of 4aj (2<sup>nd</sup> diastereomer)**

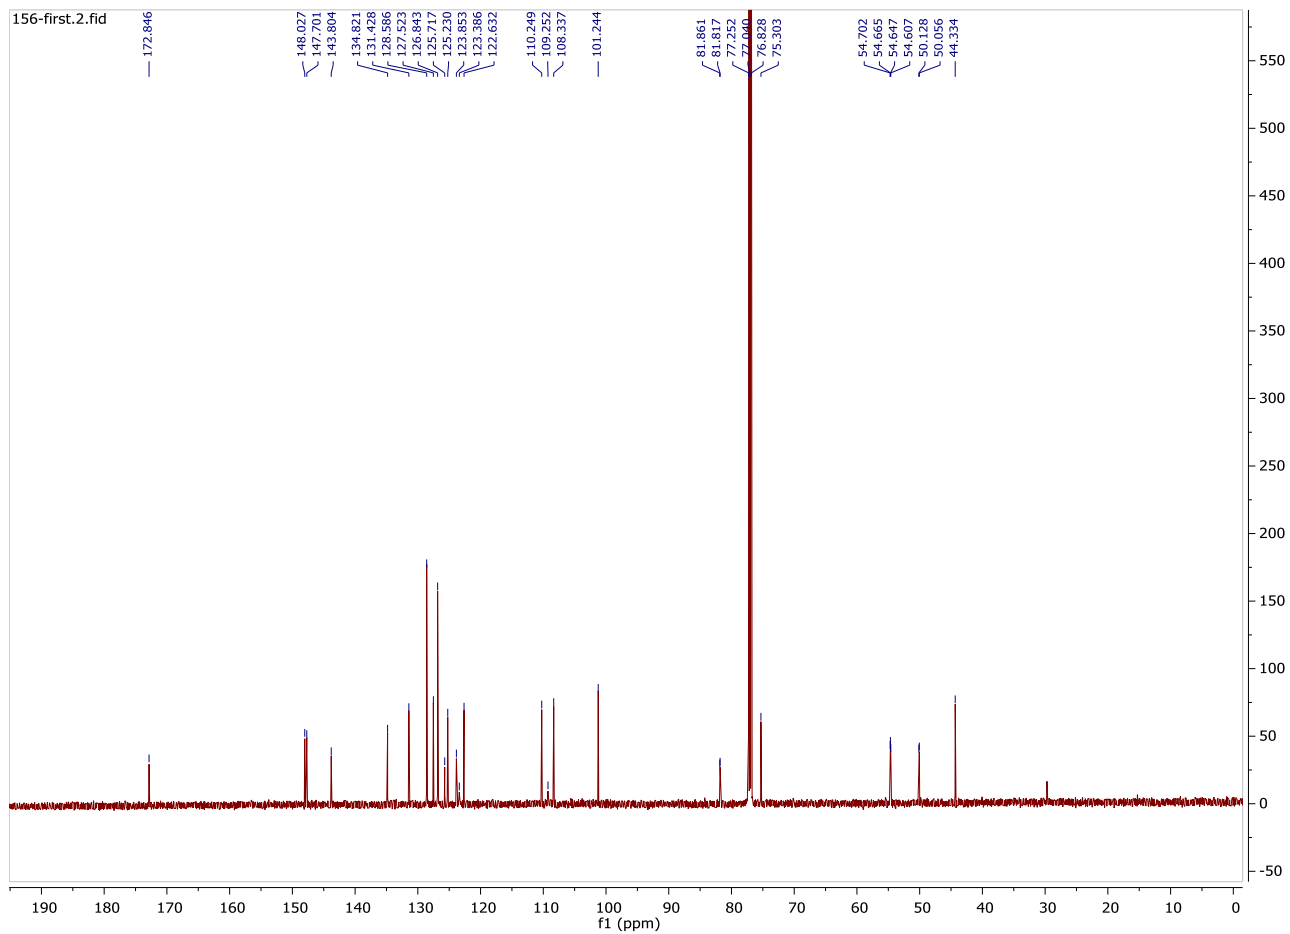

**$^{13}\text{C}$  NMR of 4aj (2<sup>nd</sup> diastereomer)**

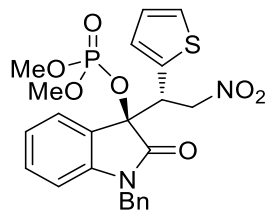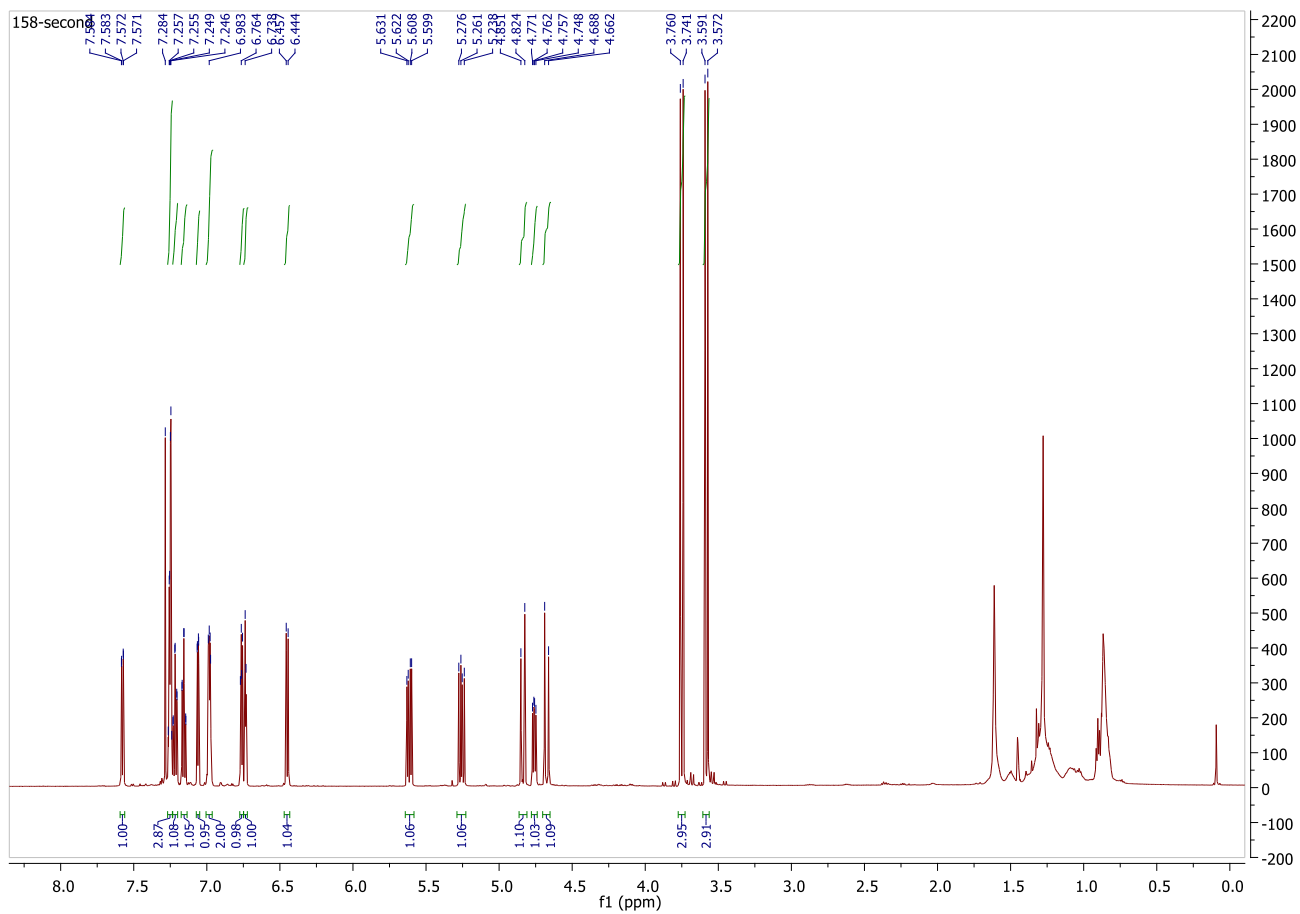

<sup>1</sup>H NMR of 4ak

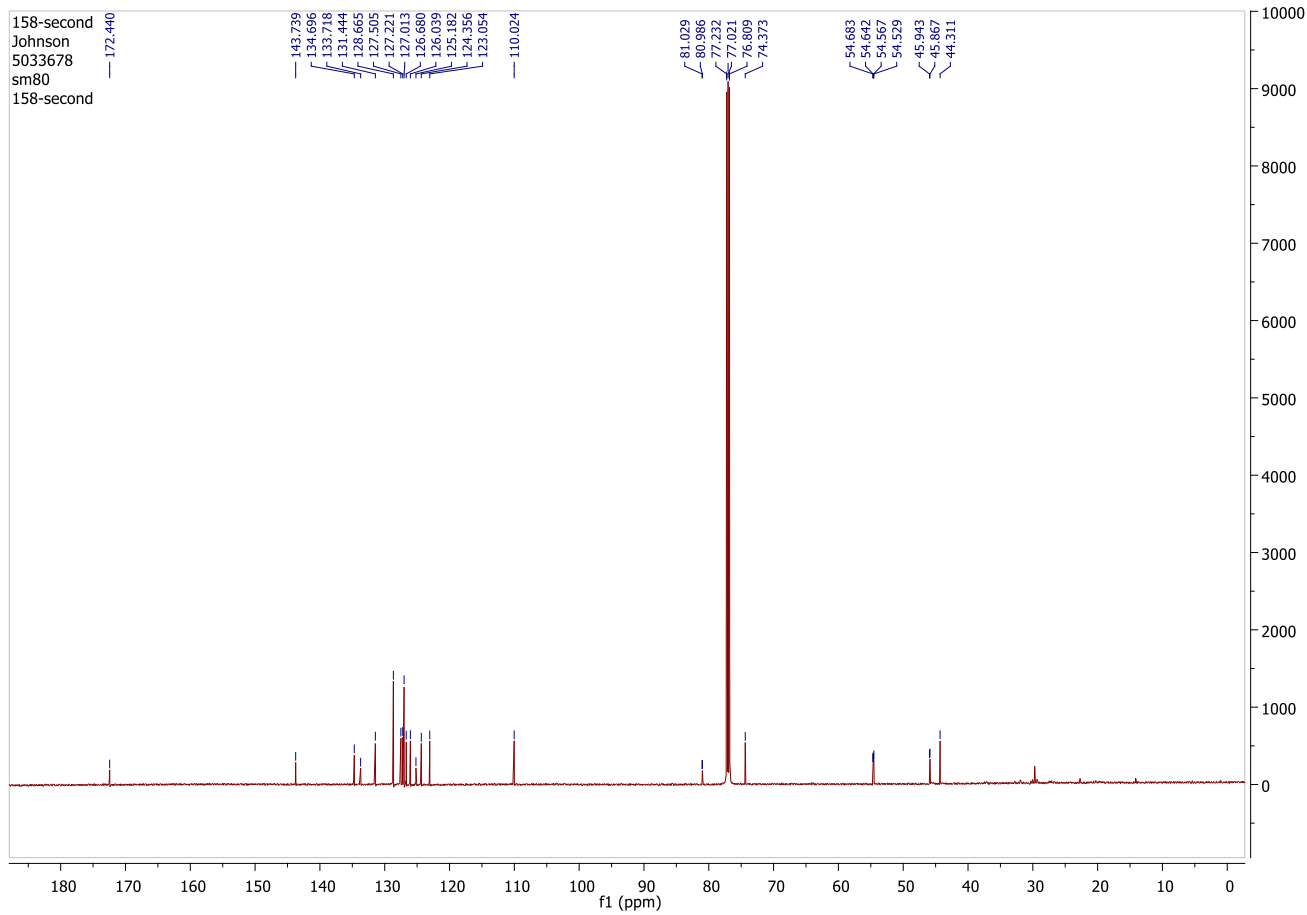

**<sup>13</sup>C NMR of 4ak**

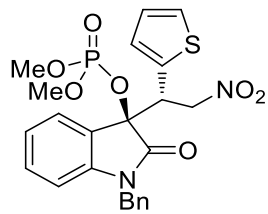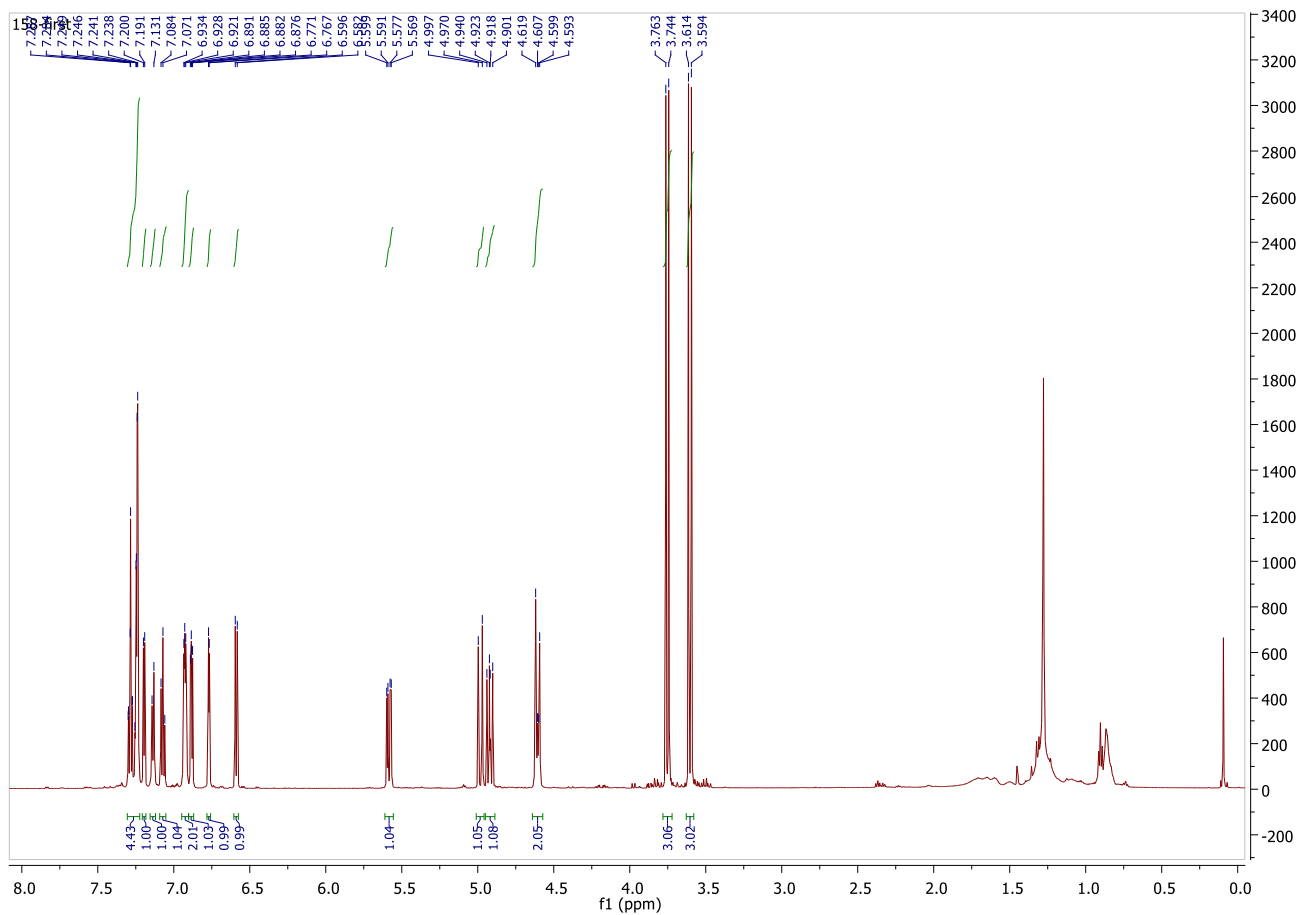

<sup>1</sup>H NMR of 4k (2<sup>nd</sup> diastereomer)

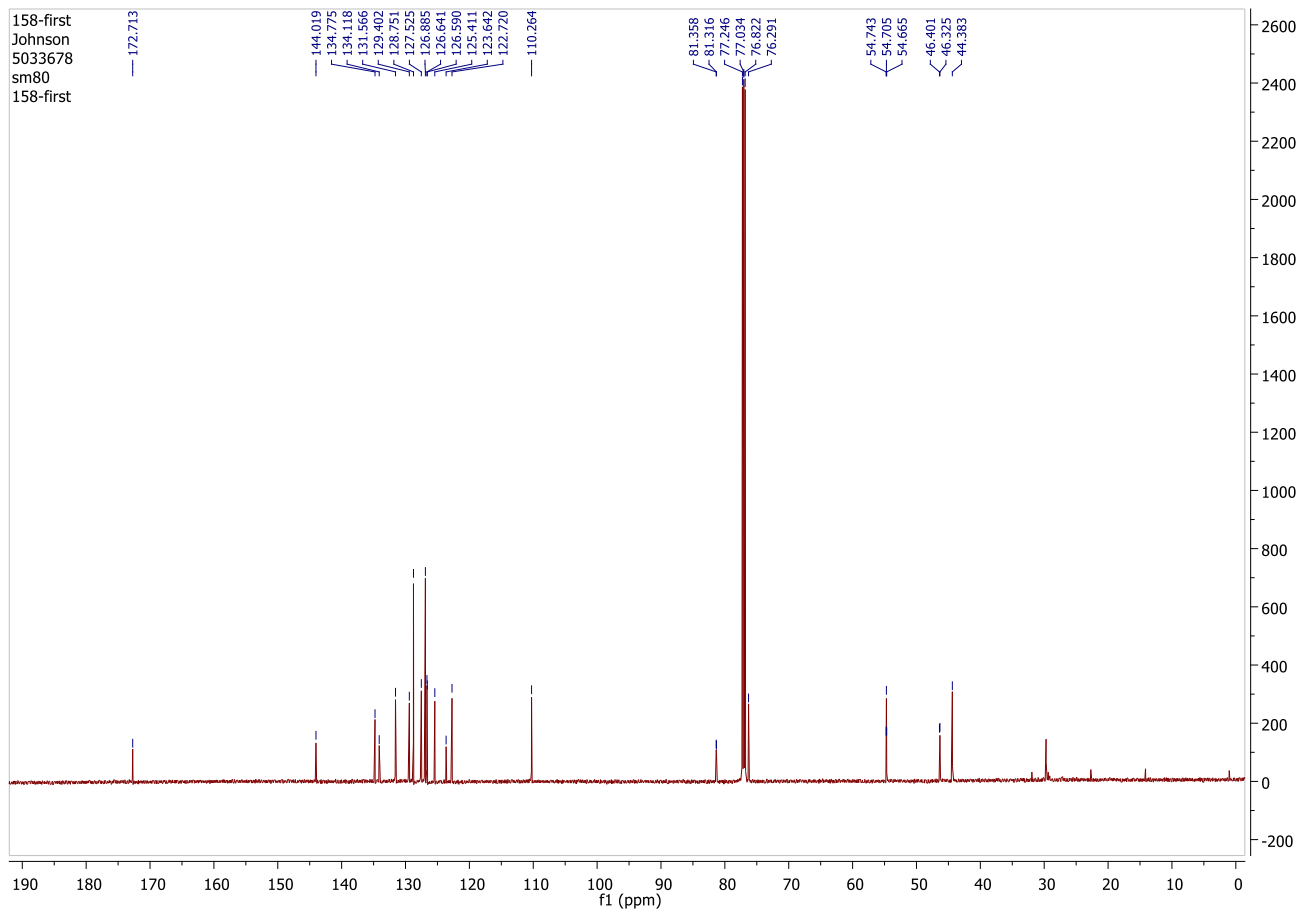

**$^{13}\text{C}$  NMR of 4ak (2<sup>nd</sup> diastereomer)**

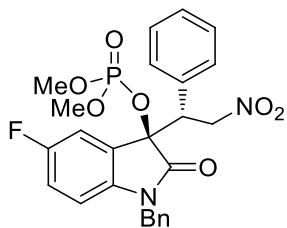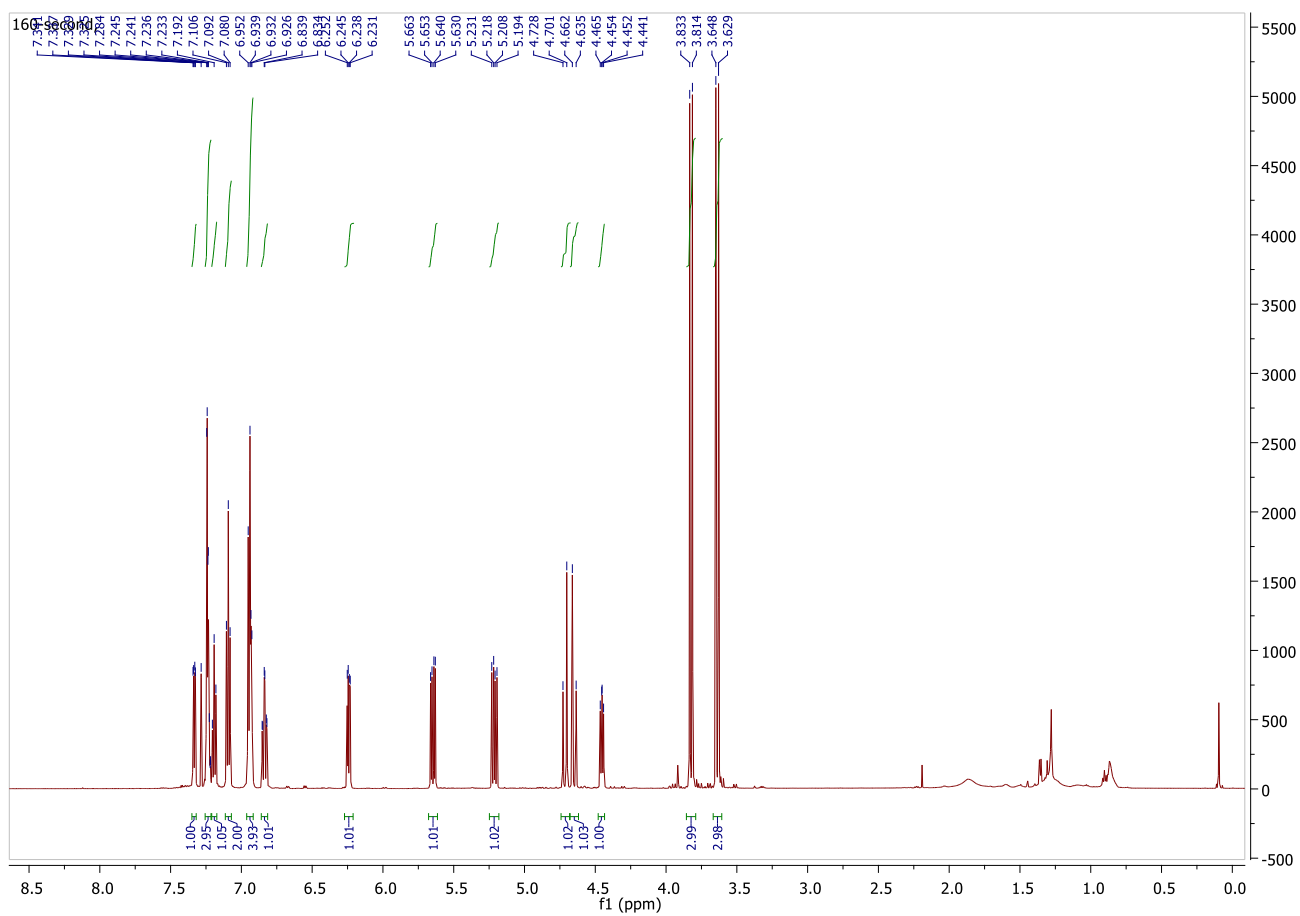

$^1\text{H}$  NMR of 4ba

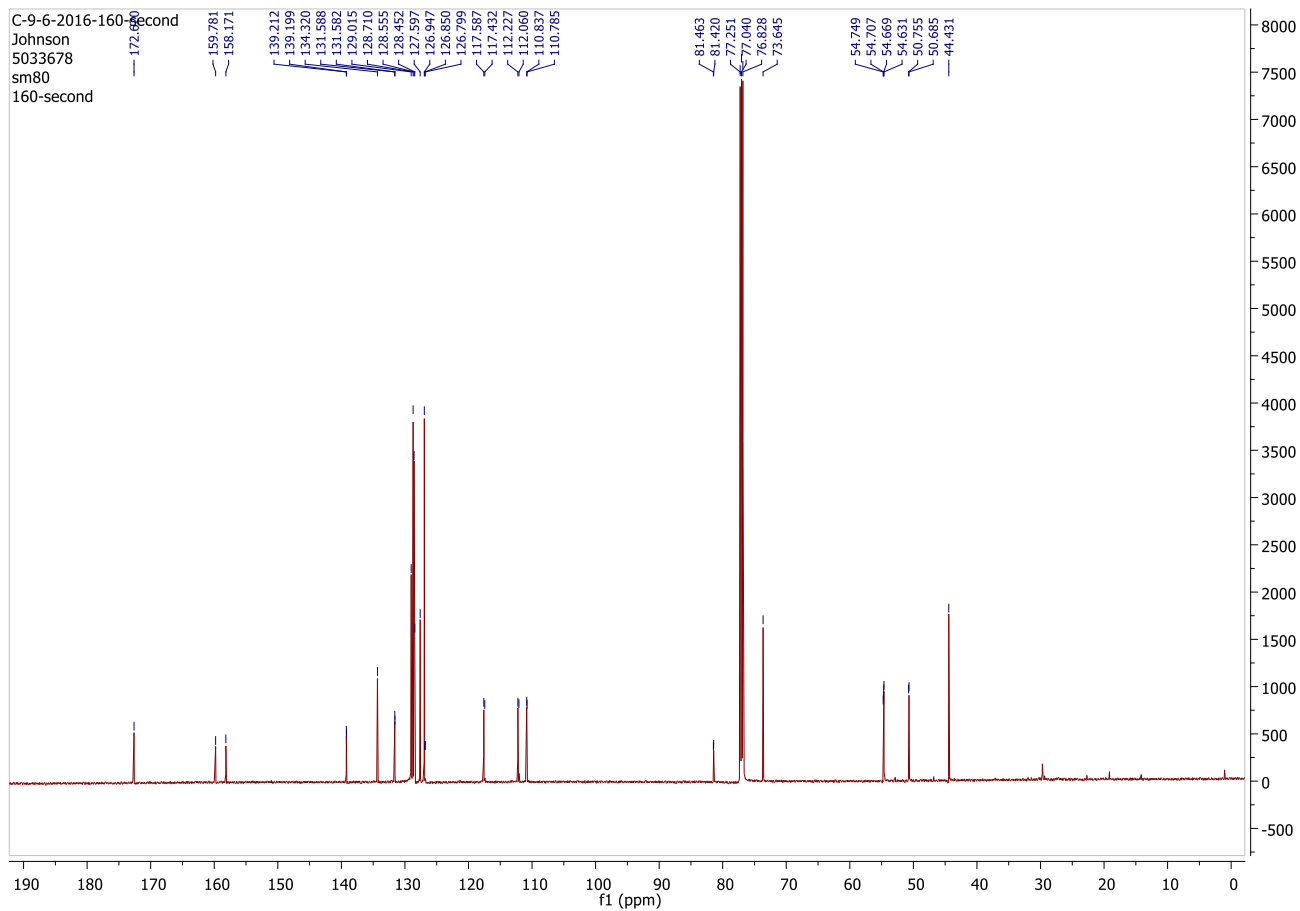

**$^{13}\text{C}$  NMR of 4ba**



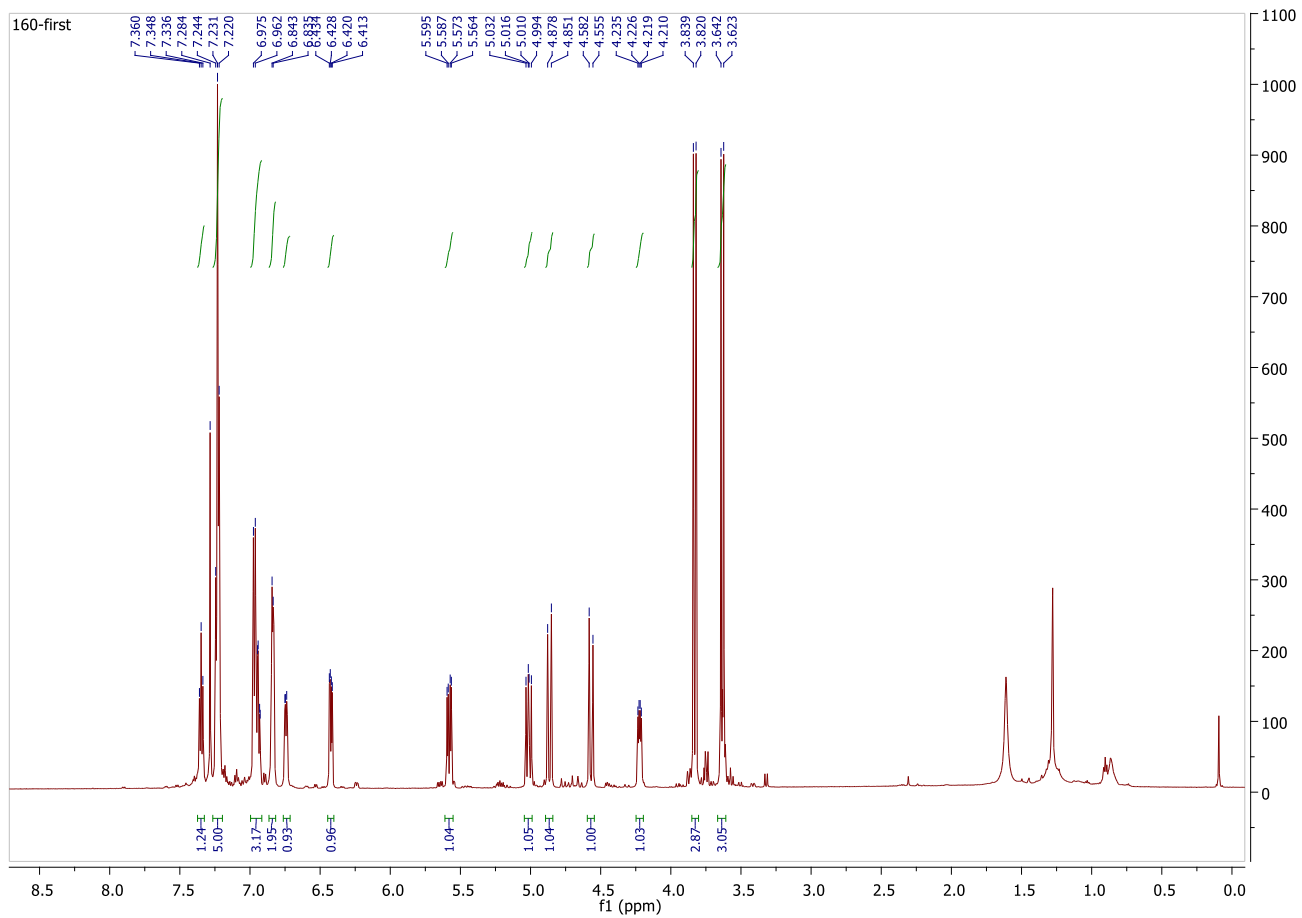

<sup>1</sup>H NMR of 4ba (2<sup>nd</sup> diastereomer)

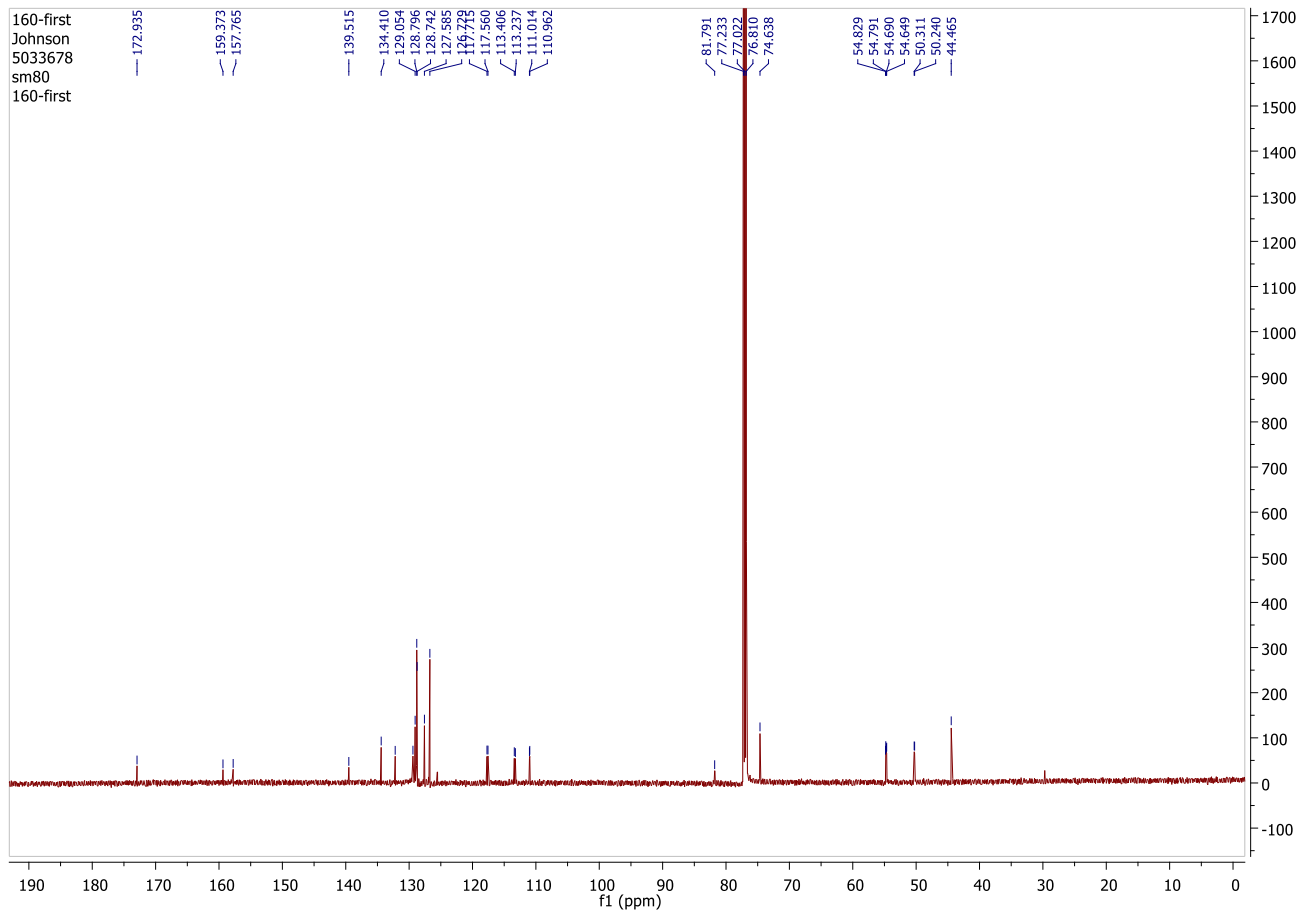

**$^{13}\text{C}$  NMR of 4ba (2<sup>nd</sup> diastereomer)**

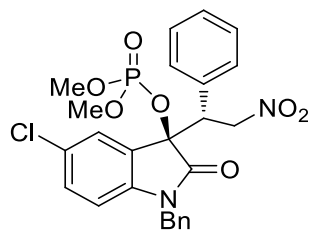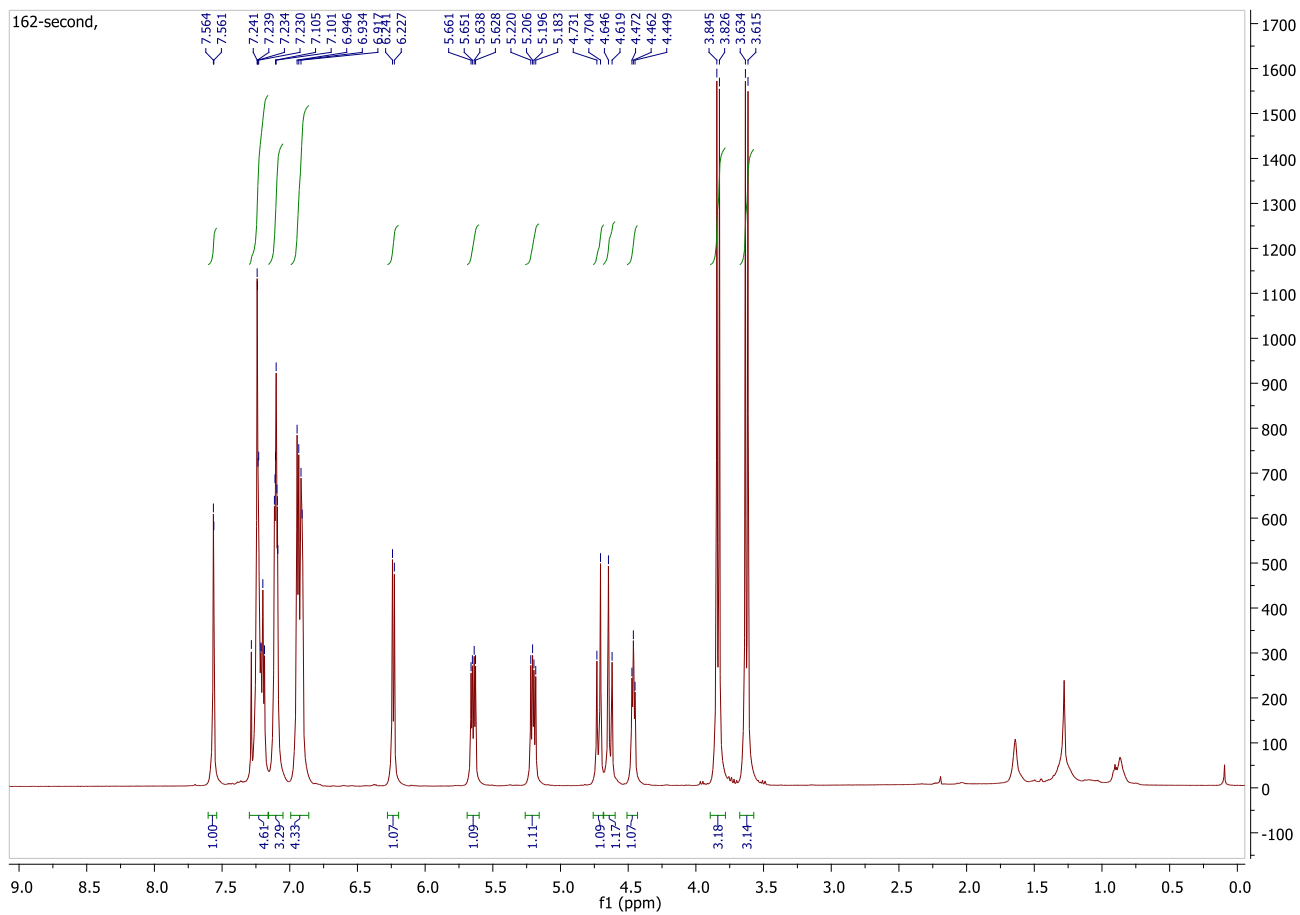

<sup>1</sup>H NMR of 4ca

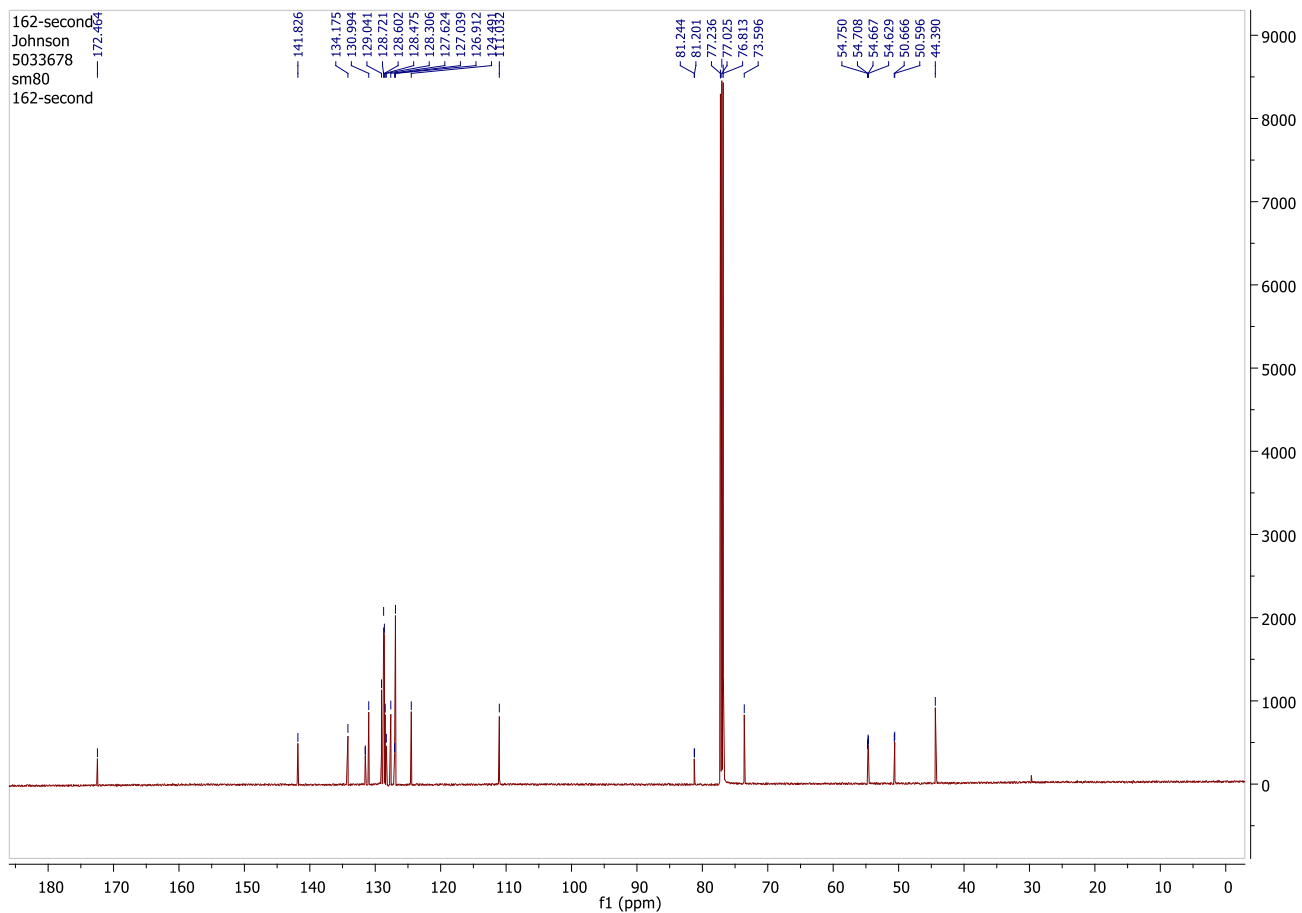

**<sup>13</sup>C NMR of 4ca**

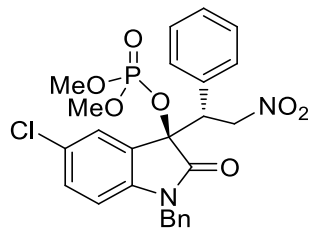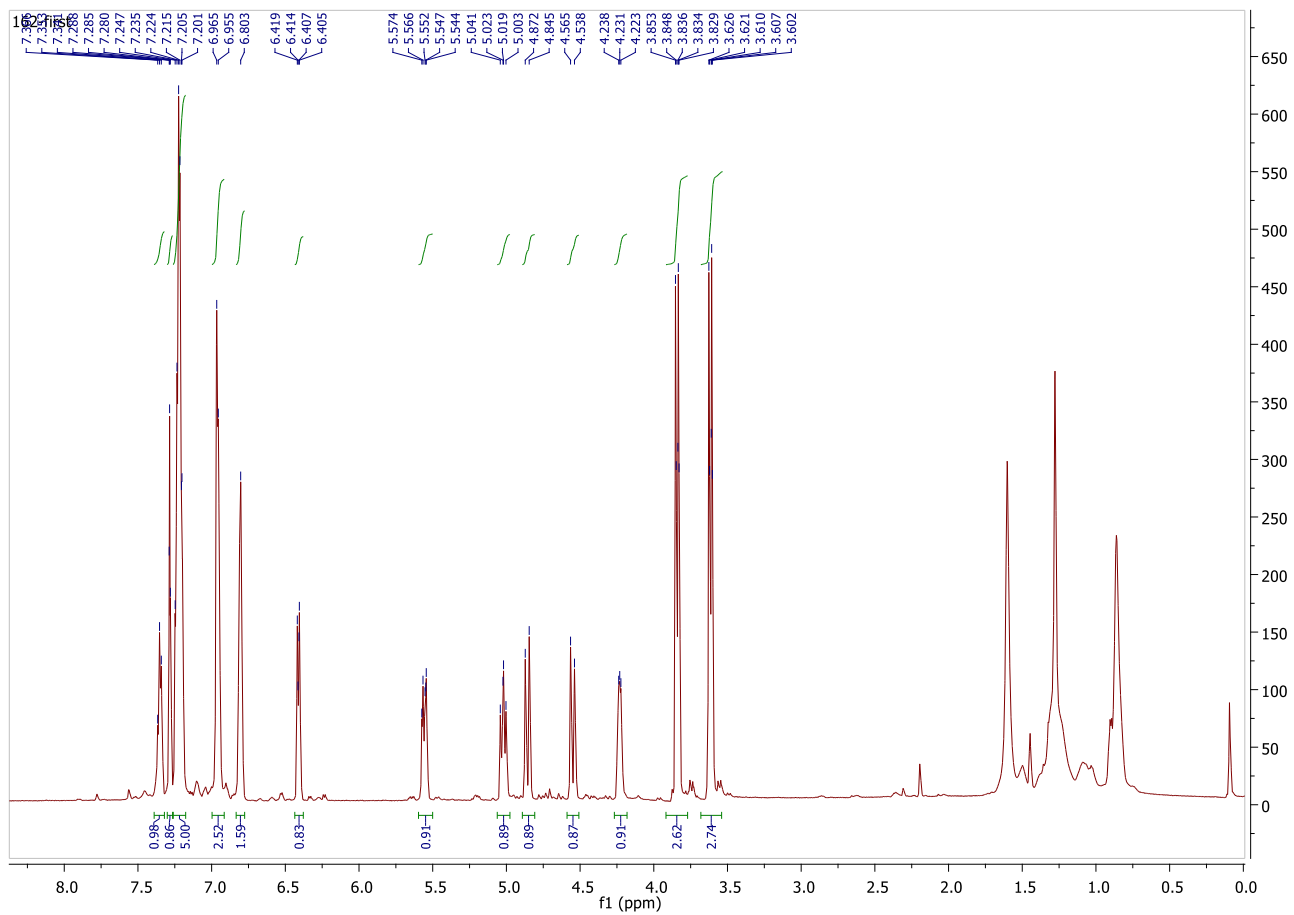

<sup>1</sup>H NMR of 4ca (2<sup>nd</sup> diastereomer)

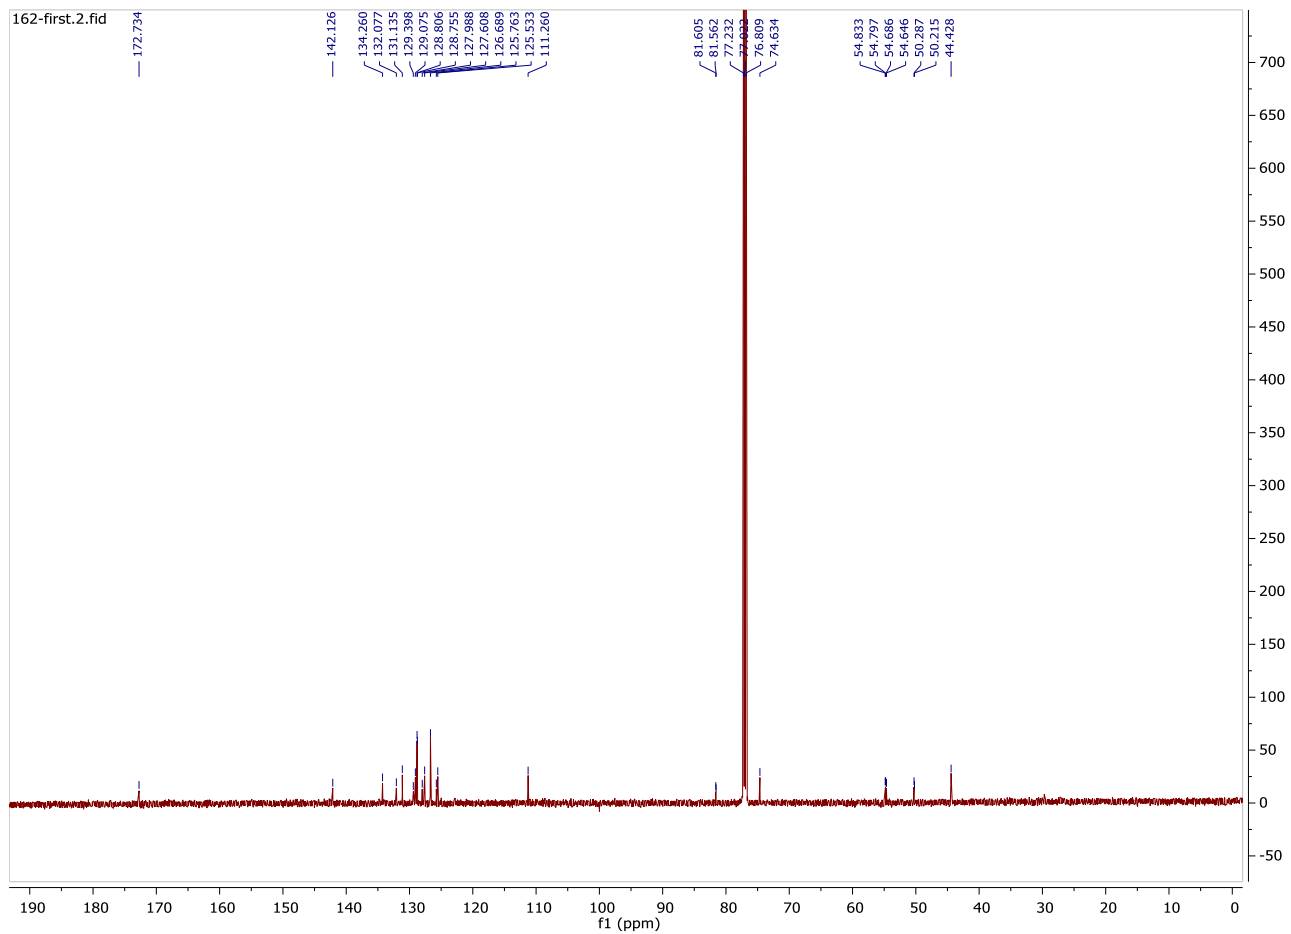

**$^{13}\text{C}$  NMR of 4ca (2<sup>nd</sup> diastereomer)**

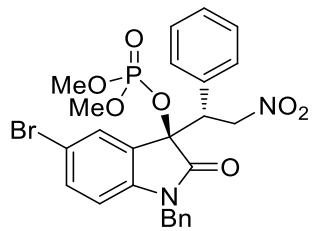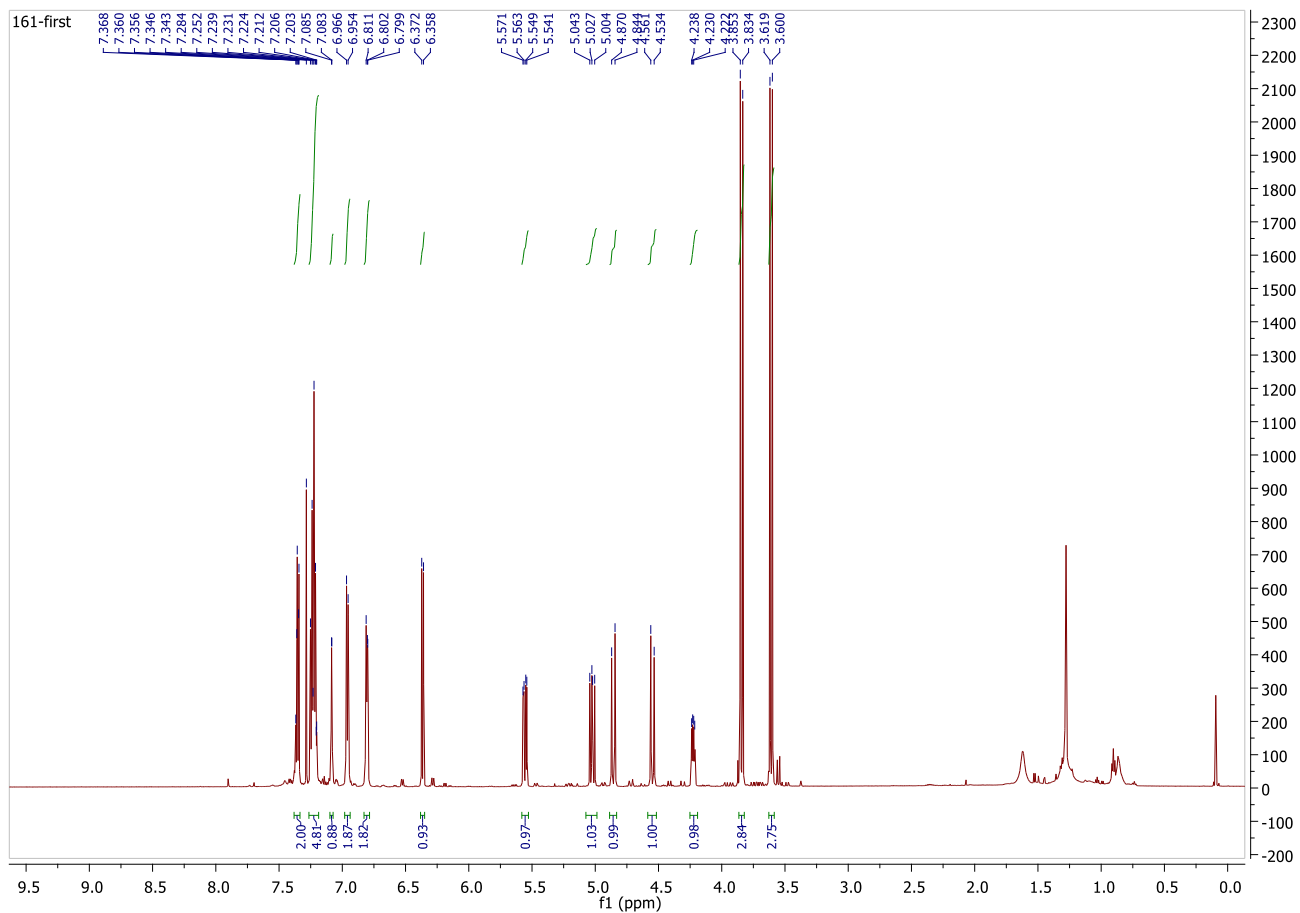

**<sup>1</sup>H NMR of 4da**

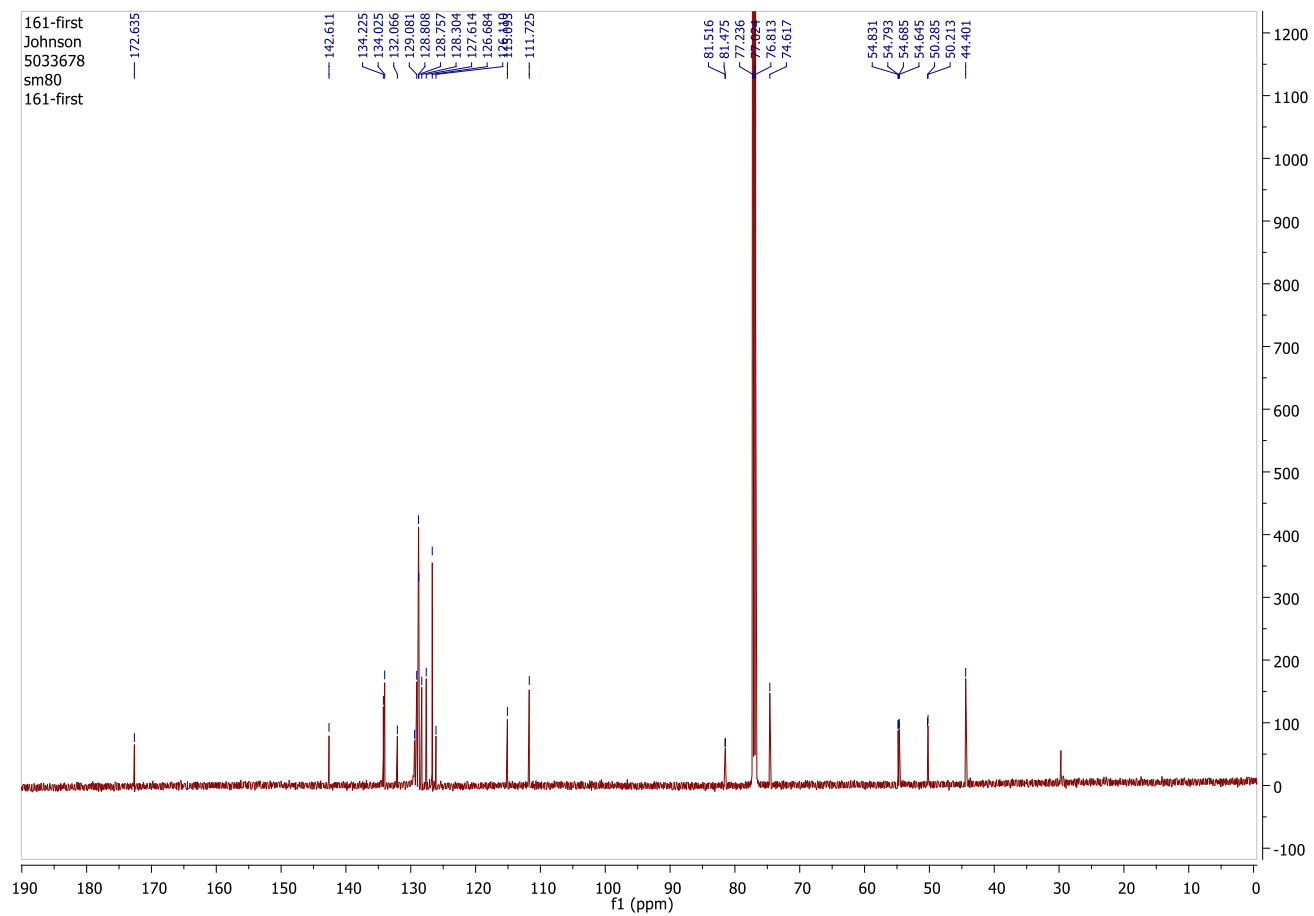

$^{13}\text{C}$  NMR of 4da



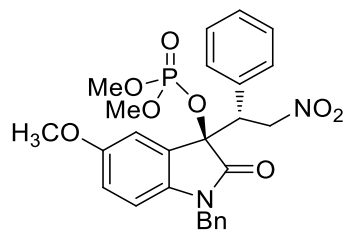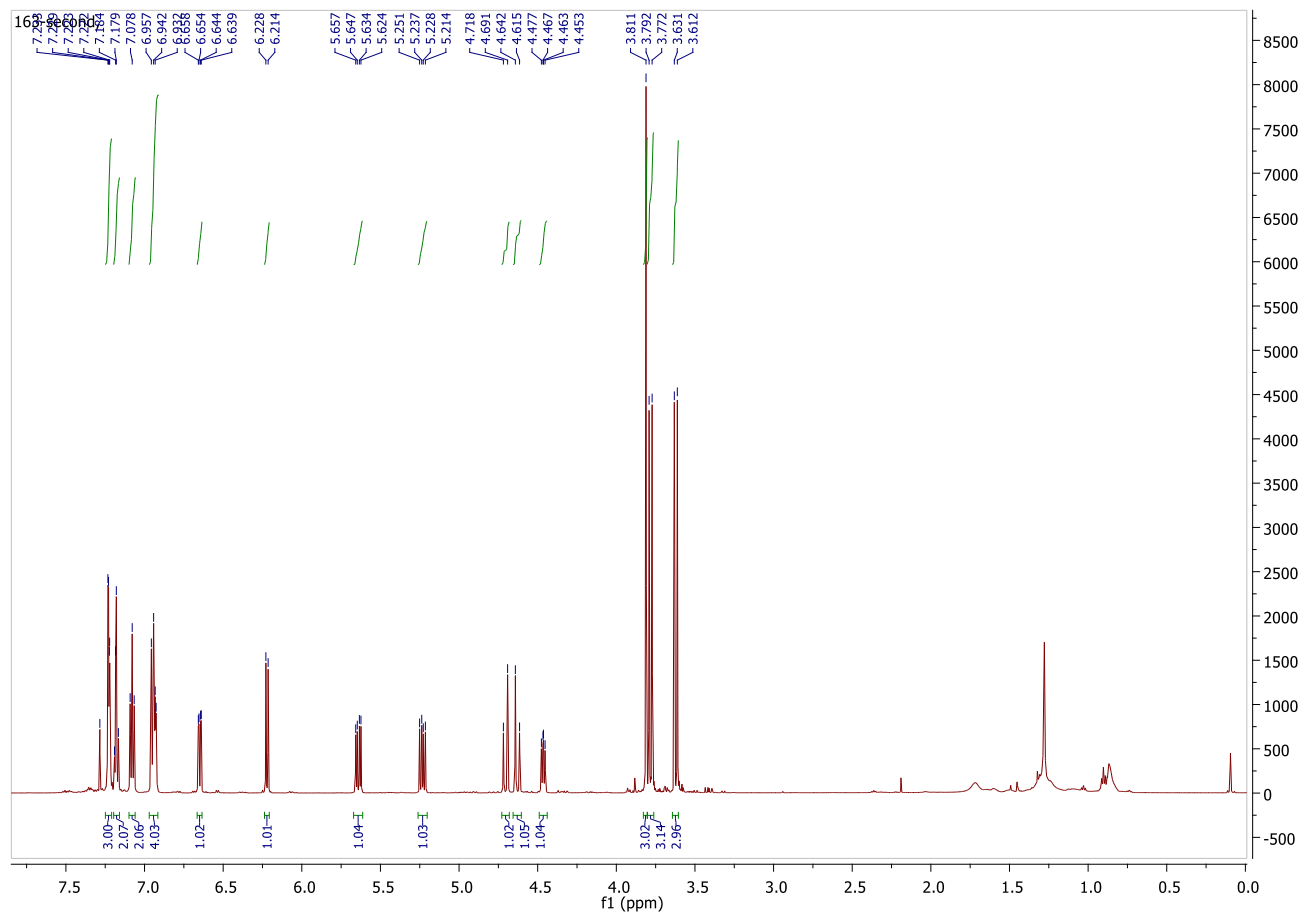

<sup>1</sup>H NMR of 4ea

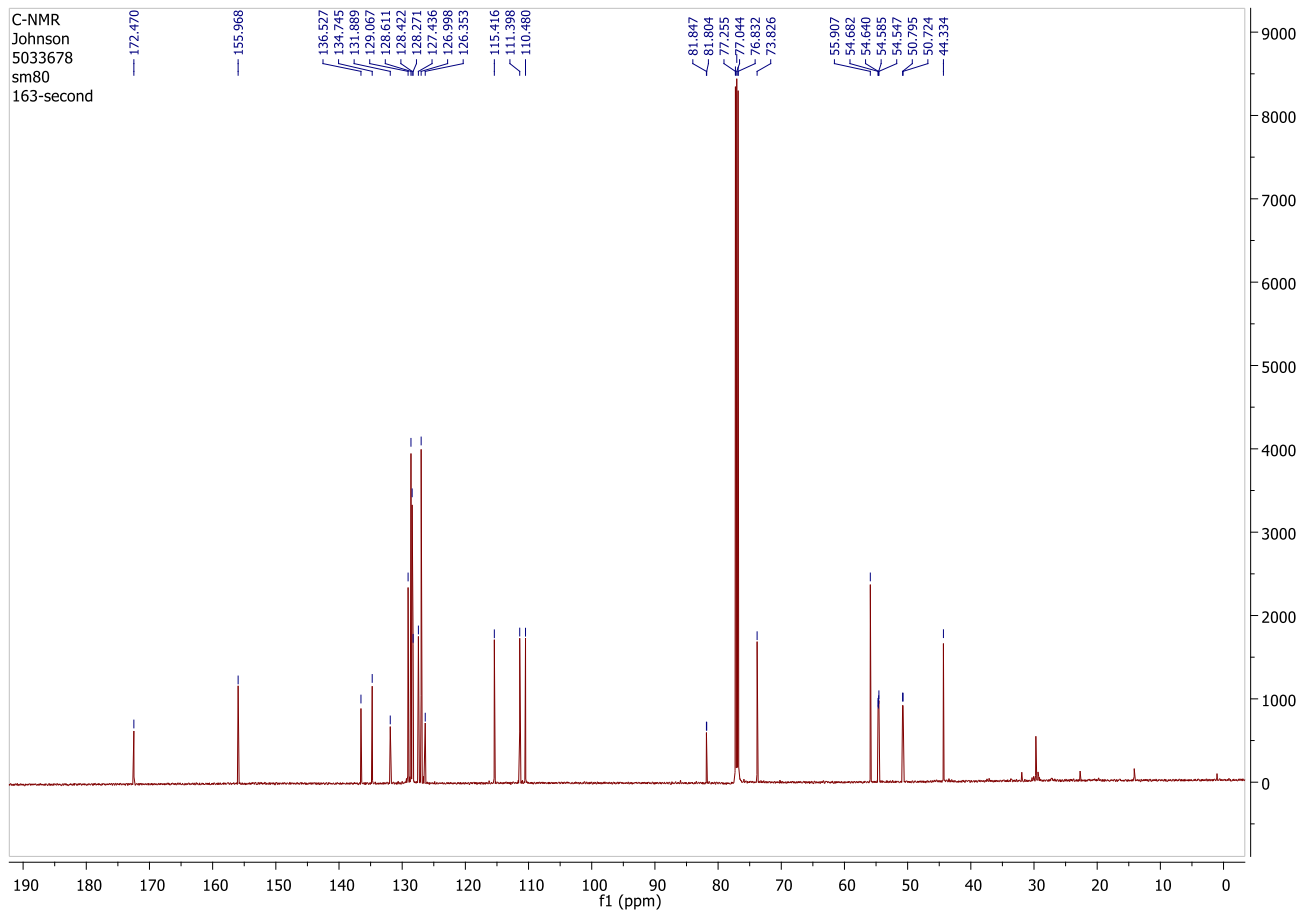

**$^{13}\text{C}$  NMR of 4ea**

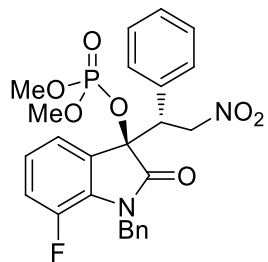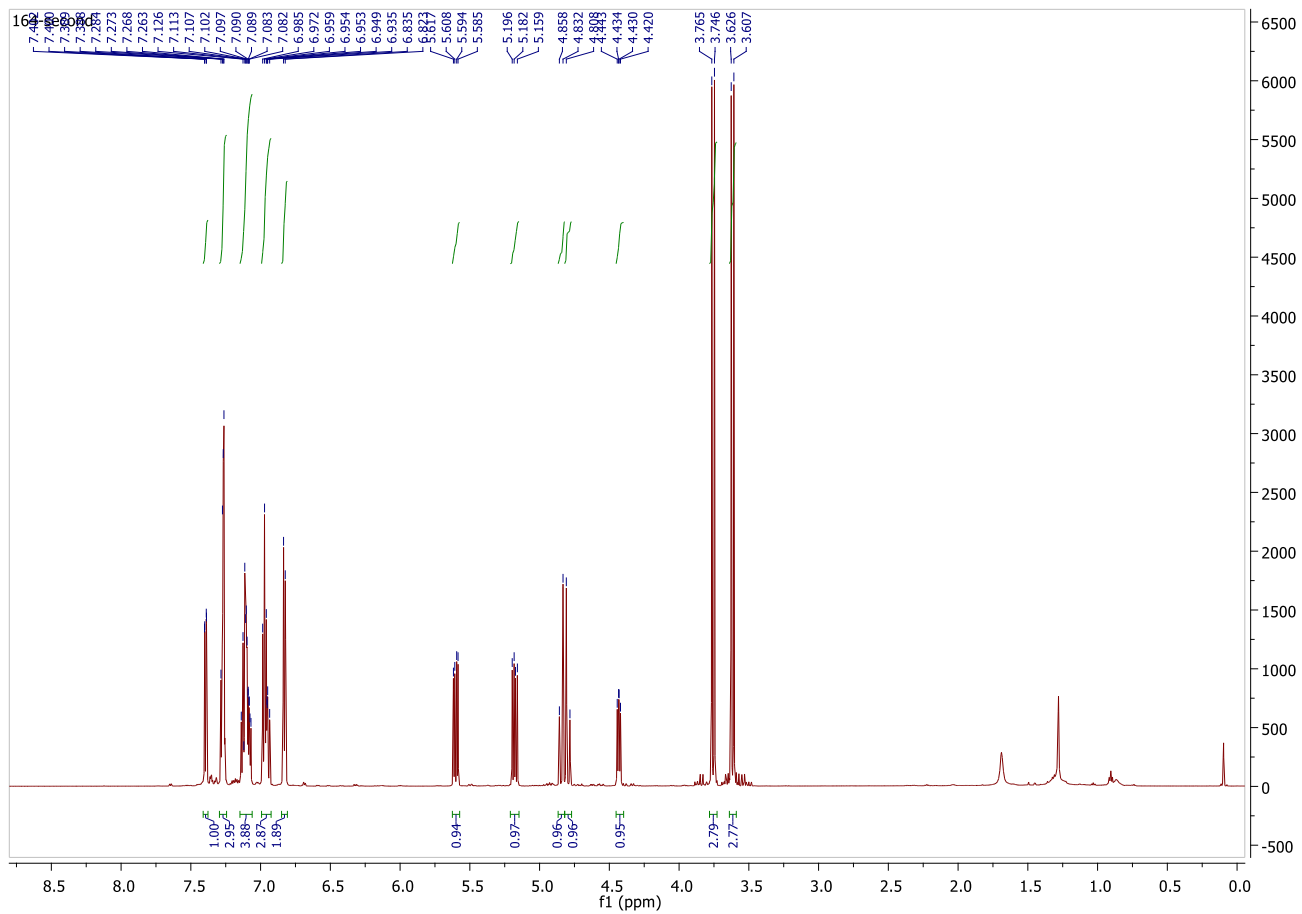

**<sup>1</sup>H NMR of 4fa**

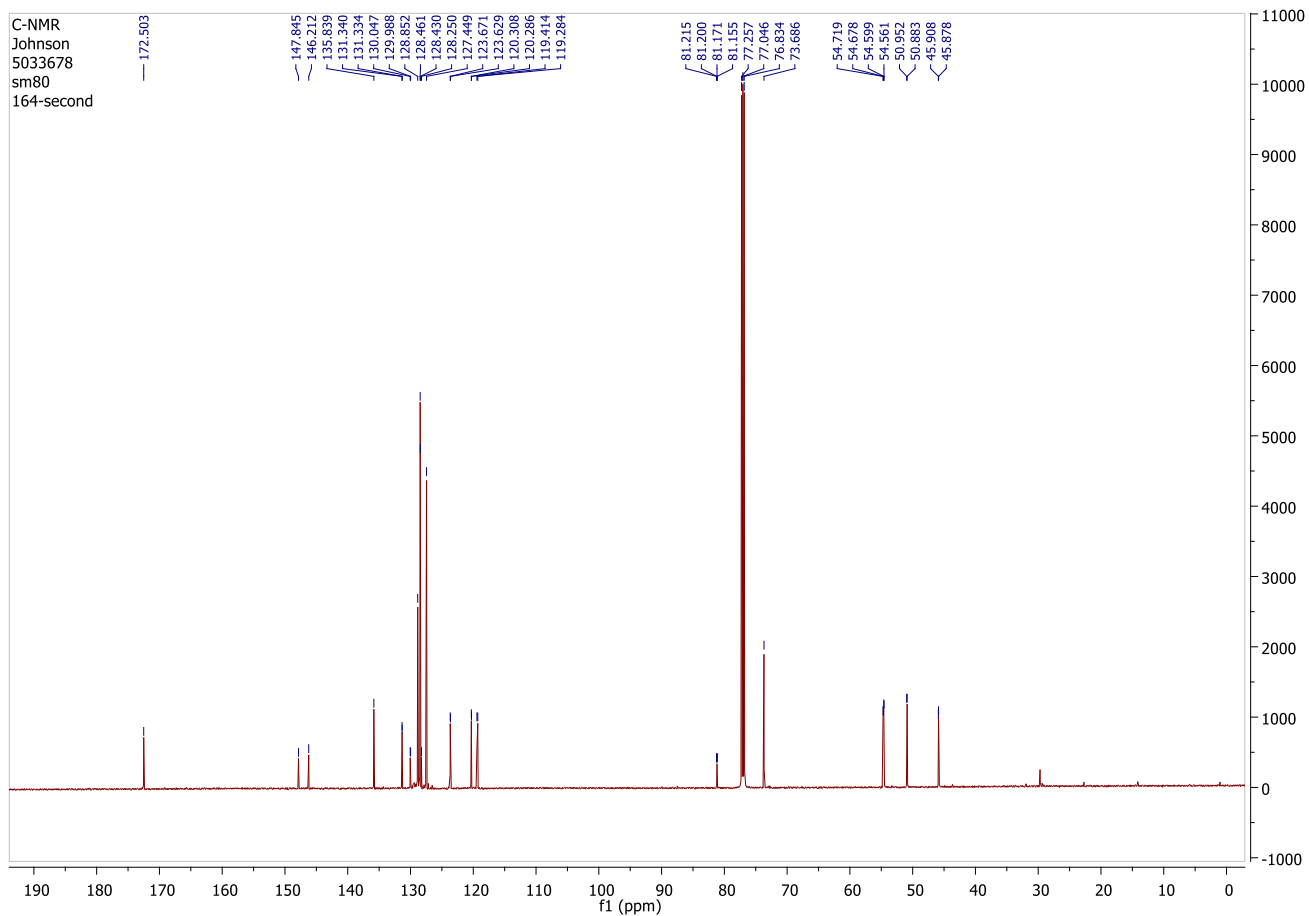

**$^{13}\text{C}$  NMR of 4fa**

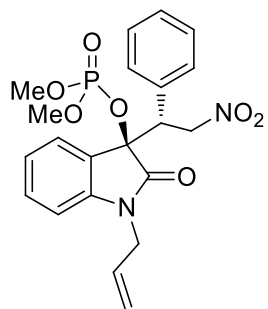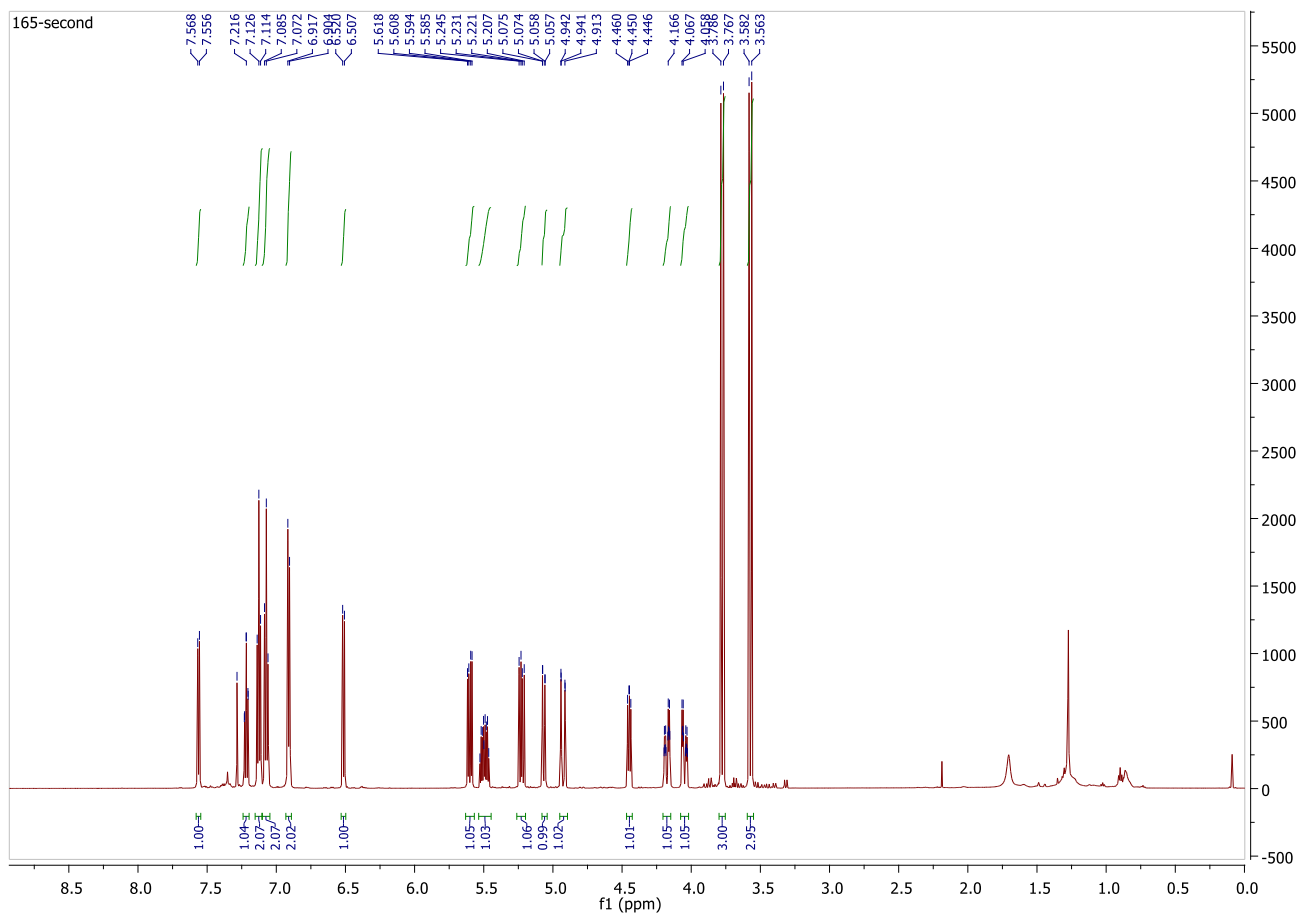

<sup>1</sup>H NMR of 4ga

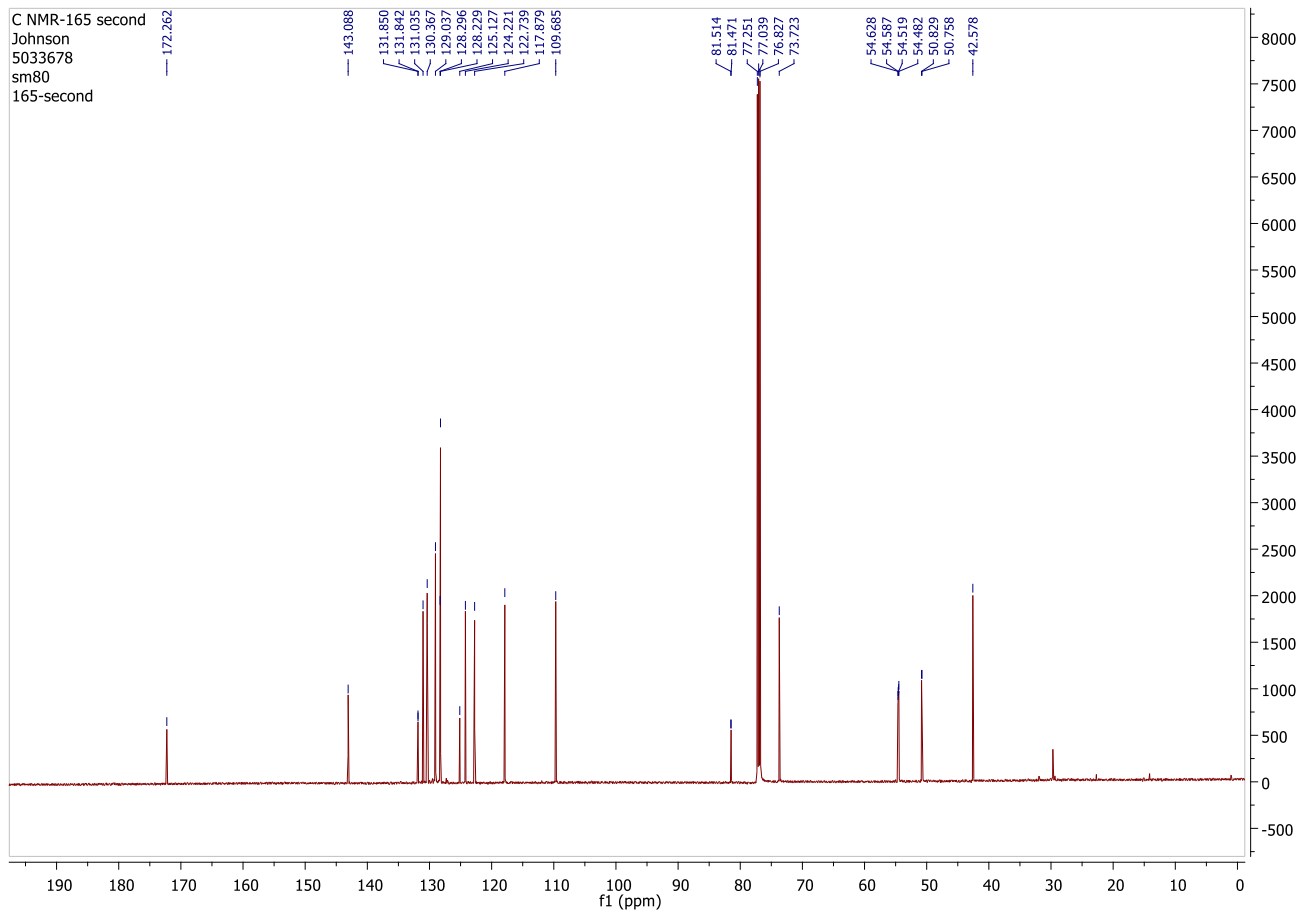

$^{13}\text{C}$  NMR of 4ga

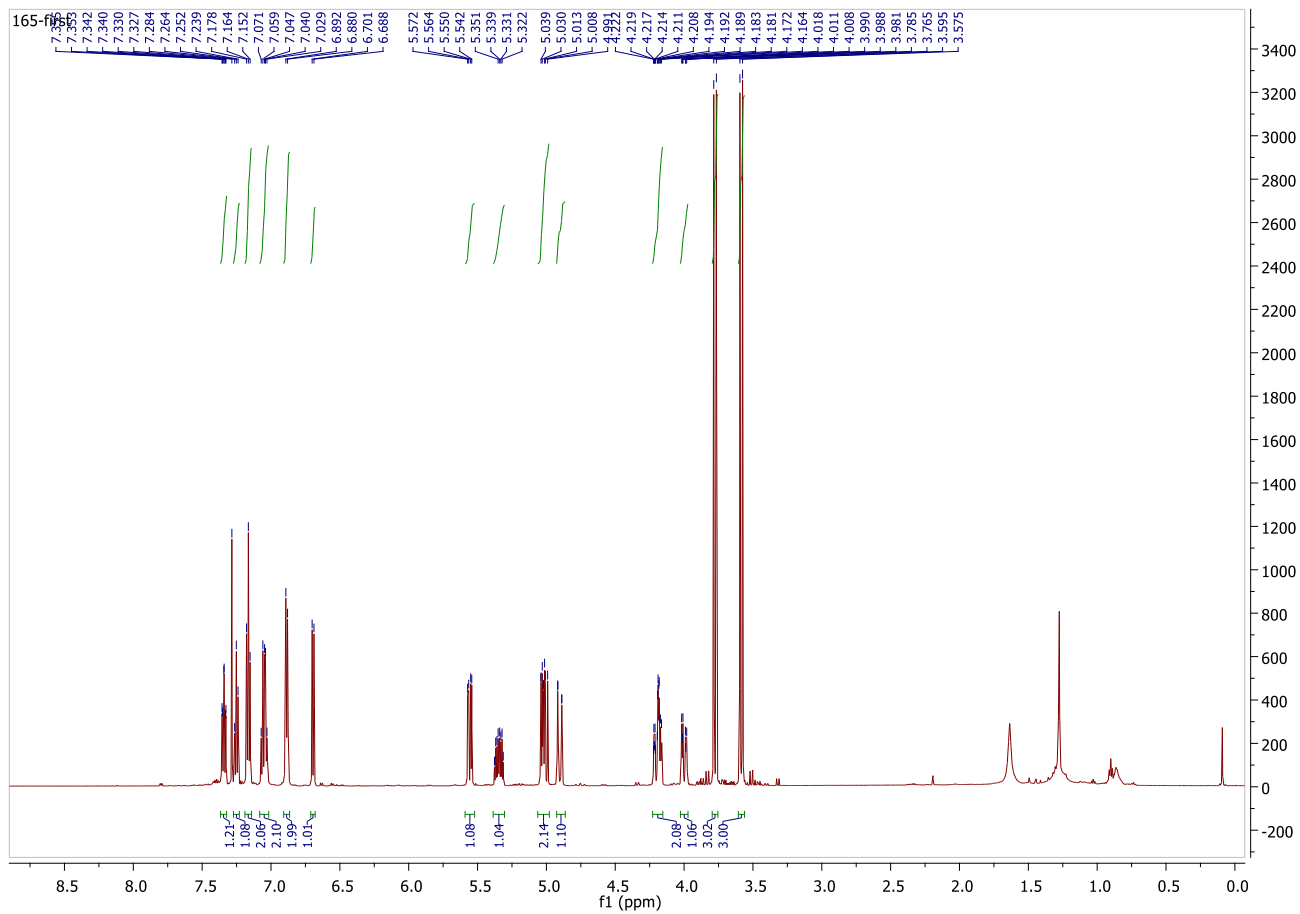

<sup>1</sup>H NMR of 4ga (2<sup>nd</sup> diastereomer)

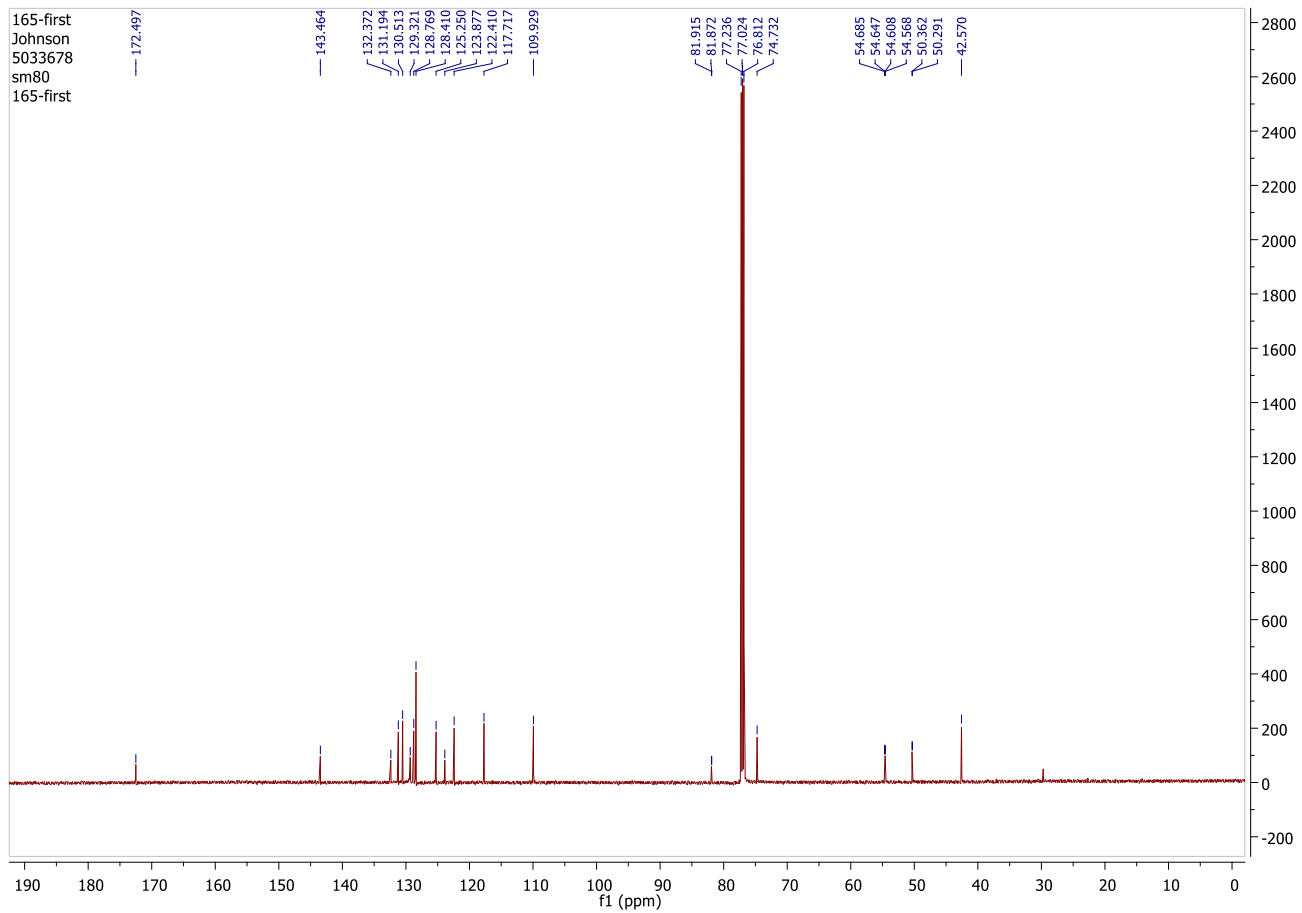

**<sup>13</sup>C NMR of 4ga (2<sup>nd</sup> diastereomer)**



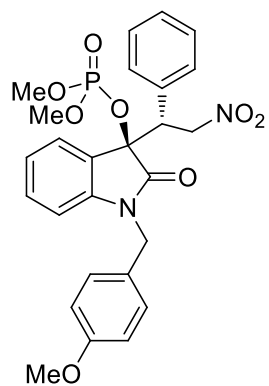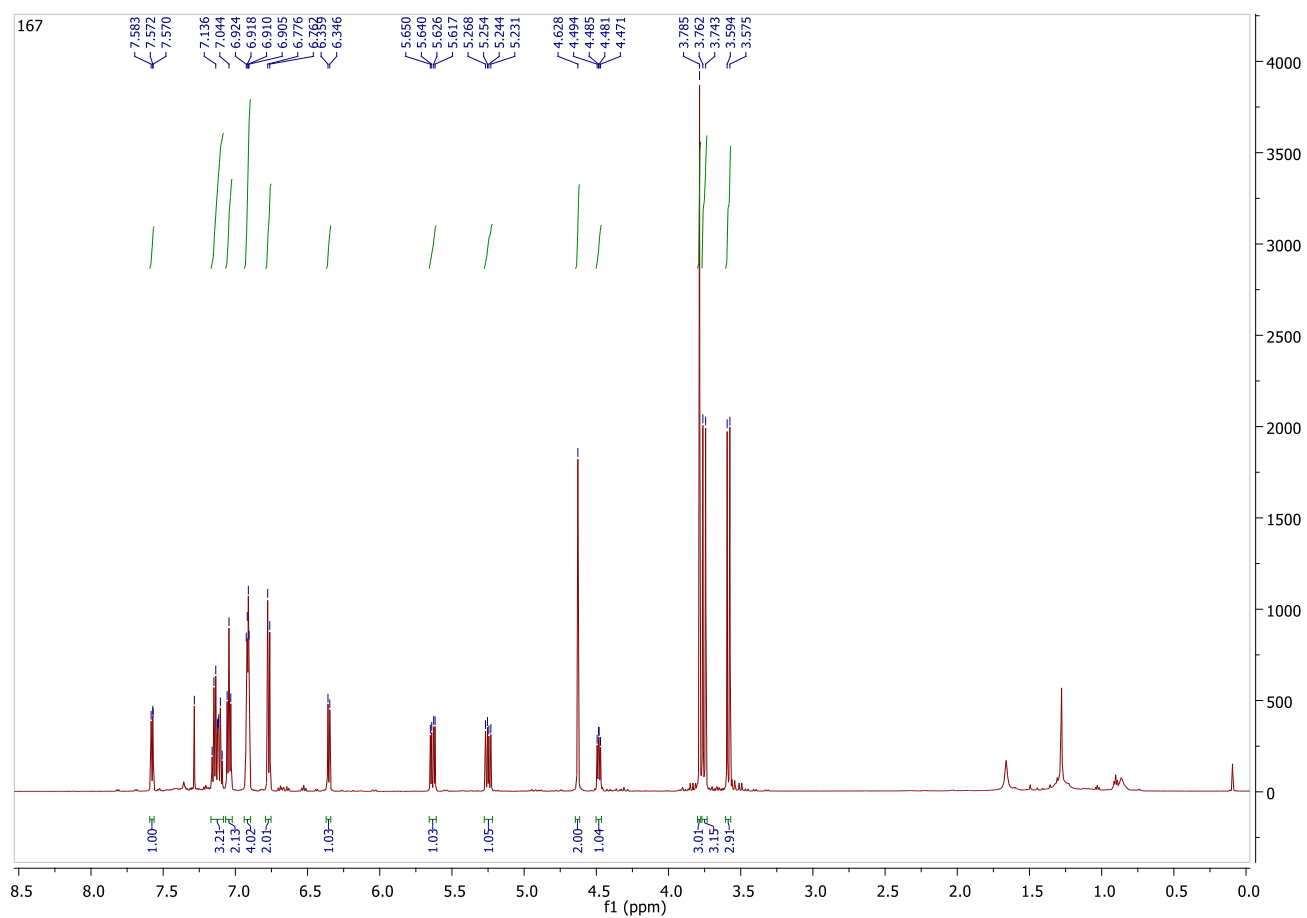

<sup>1</sup>H NMR of 4ha

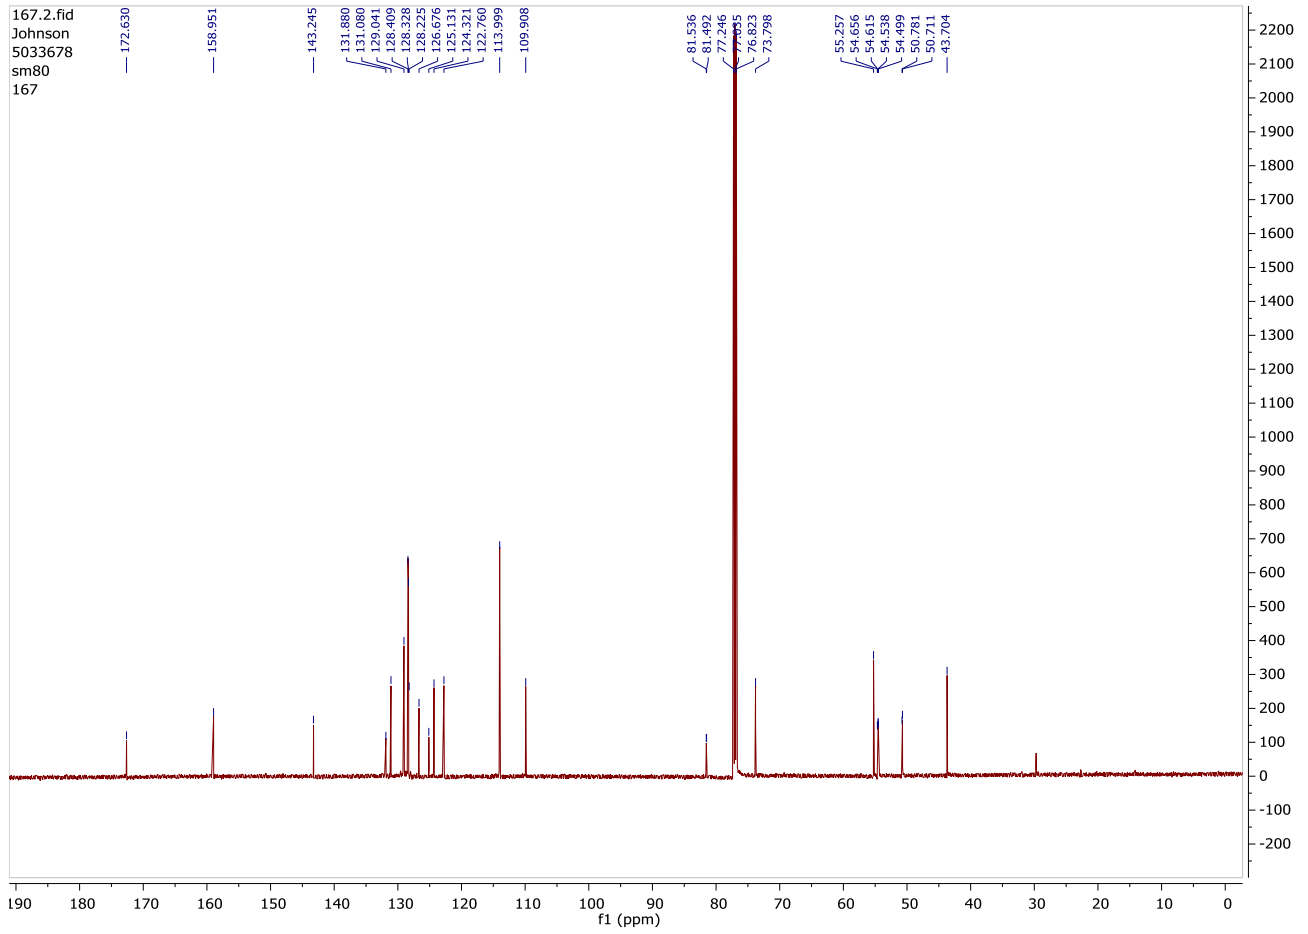

<sup>13</sup>C NMR of 4ha

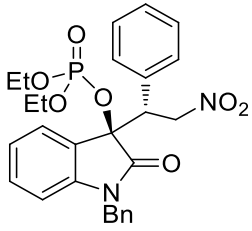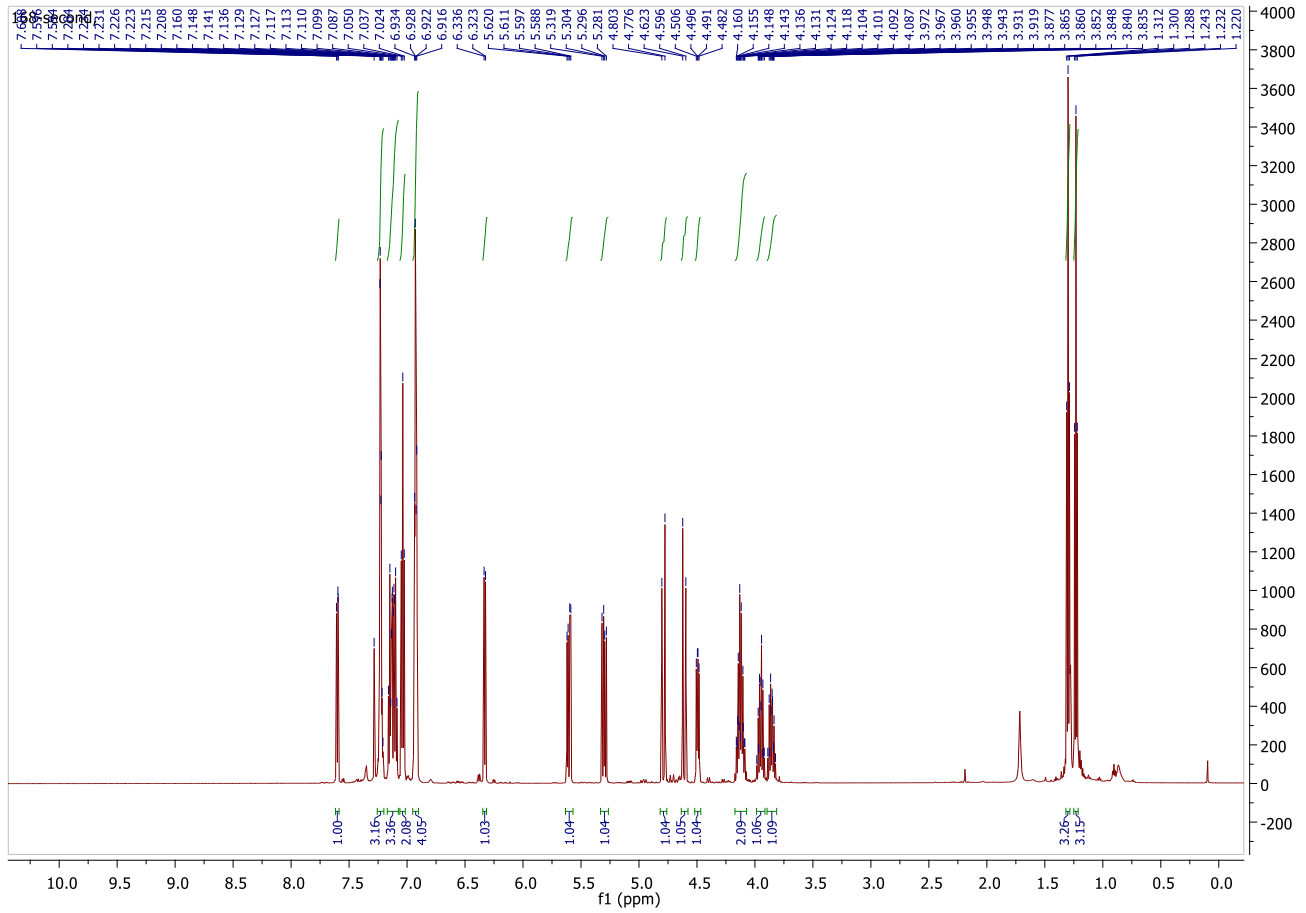

<sup>1</sup>H NMR

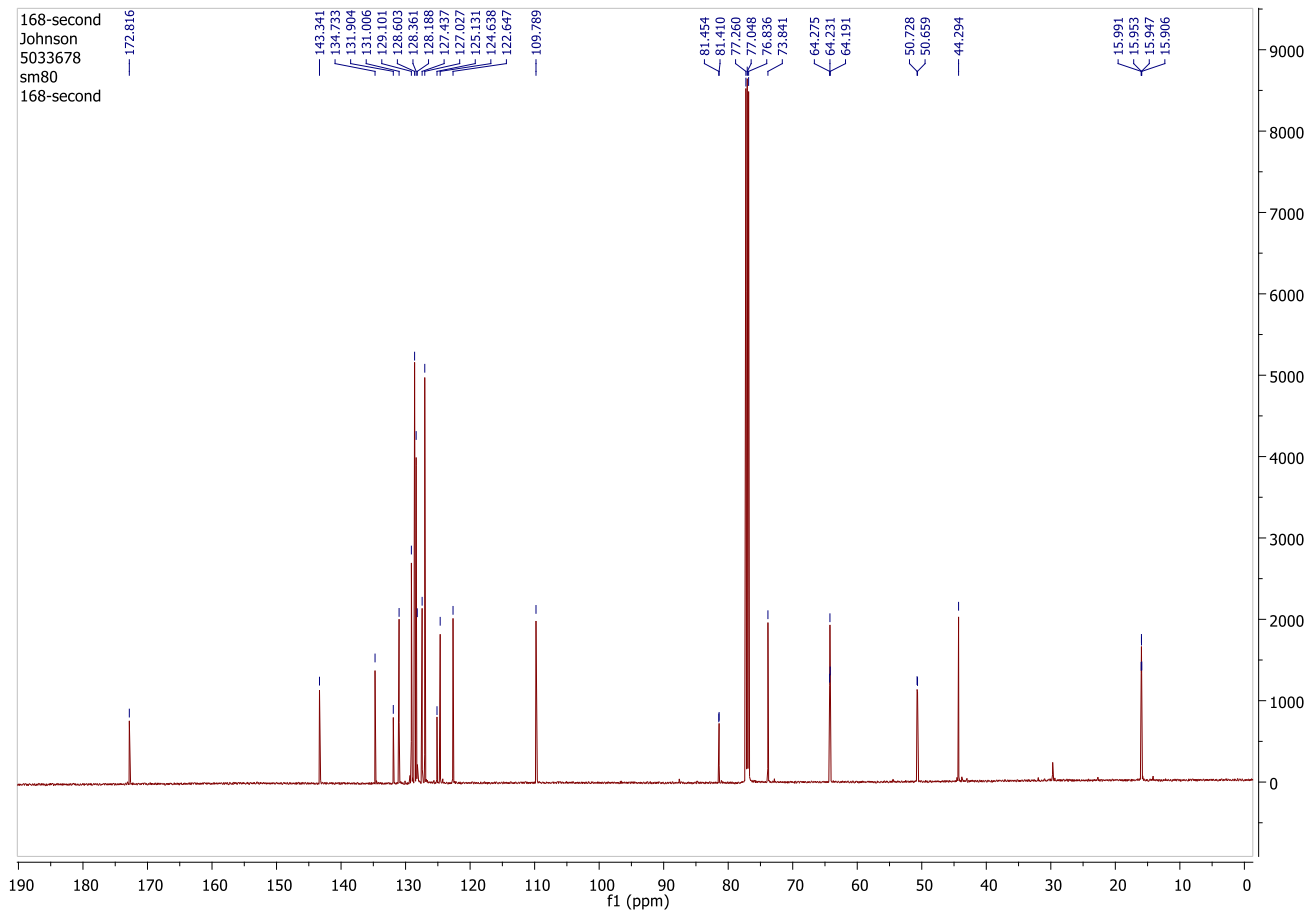

**<sup>13</sup>C NMR**

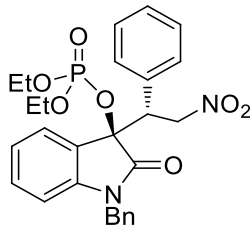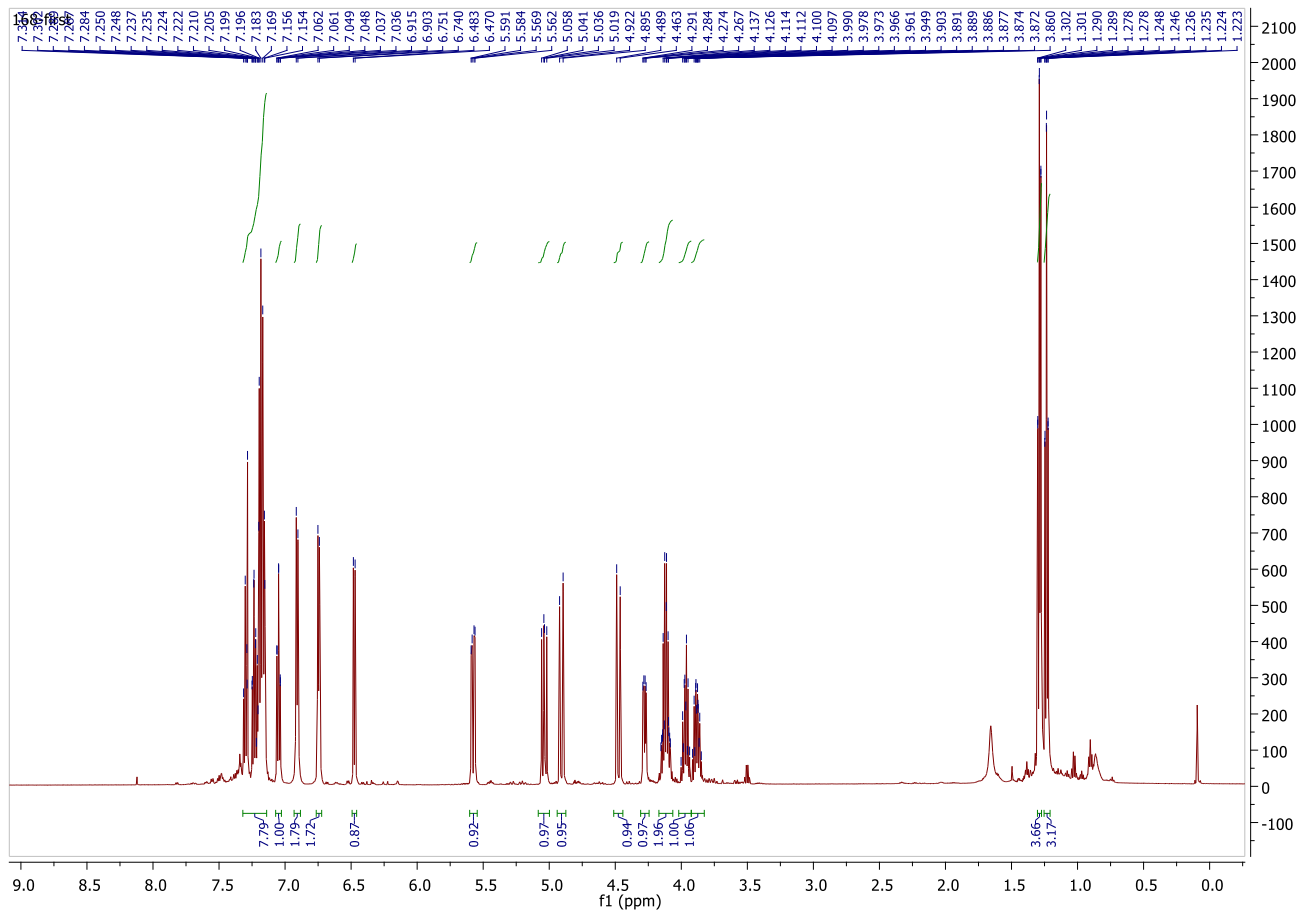

<sup>1</sup>H NMR (2<sup>nd</sup> diastereomer)

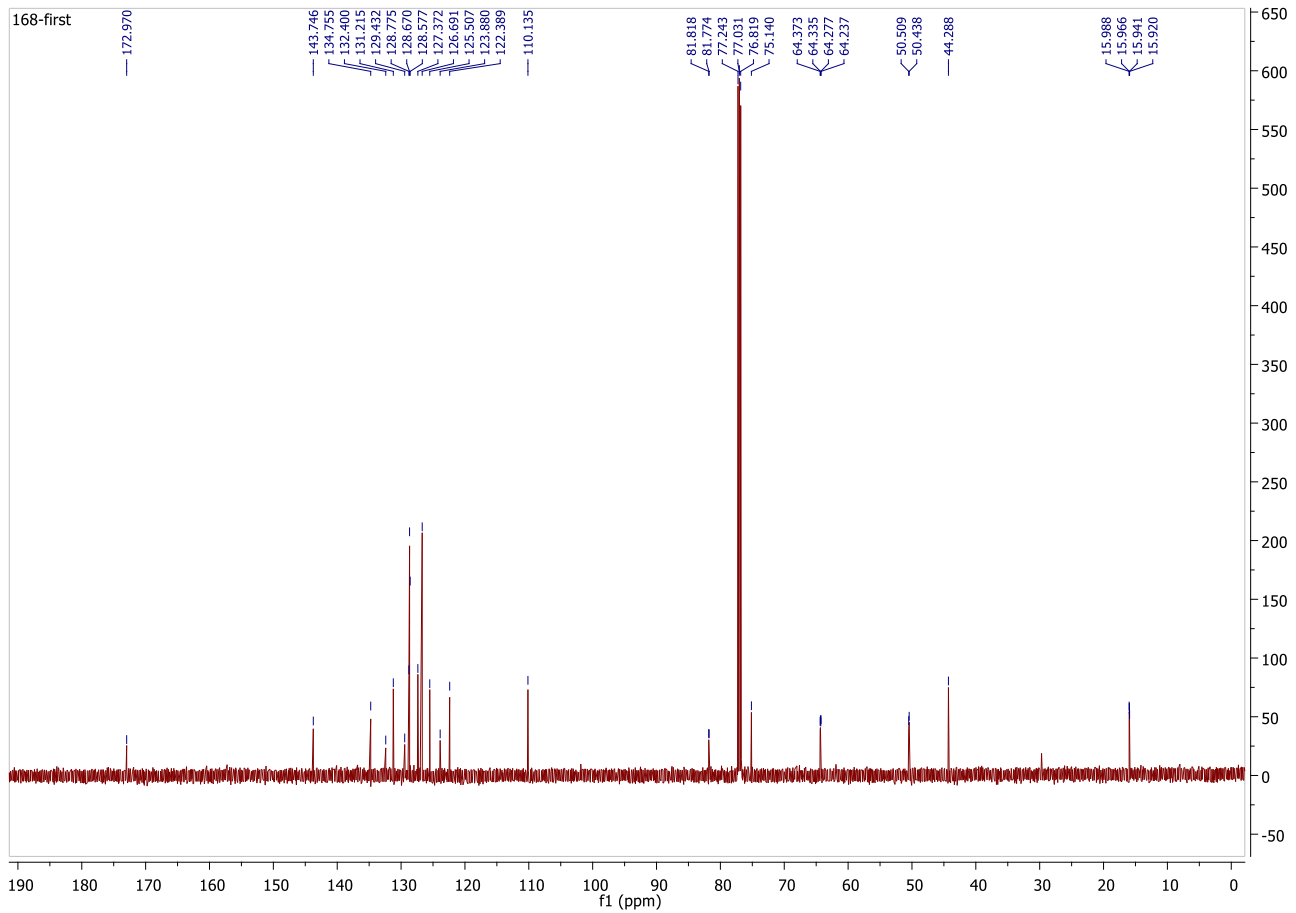

**<sup>13</sup>C NMR (2<sup>nd</sup> diastereomer)**

## HPLC trace

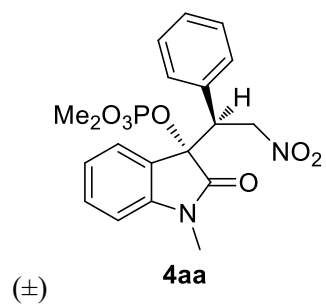

Chiralpak ID column, Hex/*i*PrOH = 85:5, flow rate = 1.0 mL/min,  $\lambda$  = 210 nm.

Racemic

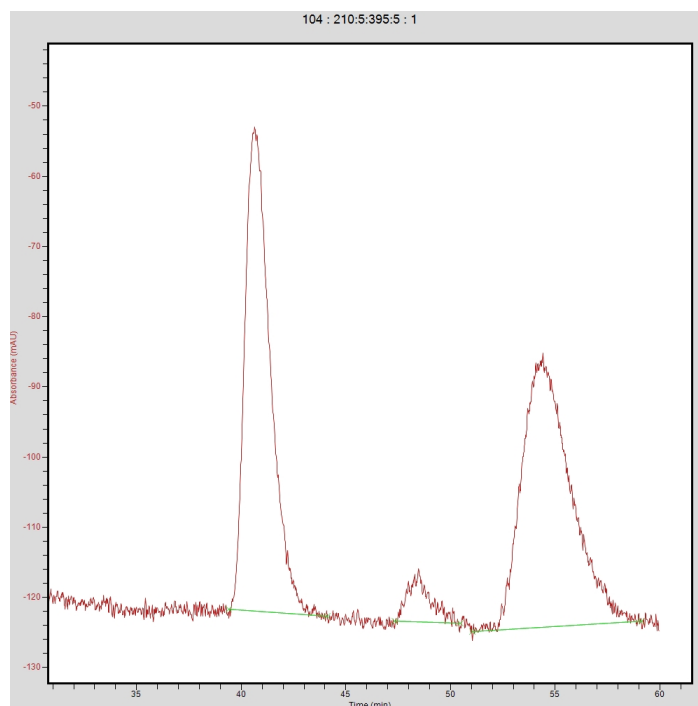

| Ret. Time (min) | Area       | % Total Area |
|-----------------|------------|--------------|
| 40.647          | 5789817.98 | 48.2         |
| 54.417          | 6210805.99 | 51.7         |

# Asymmetric

103 : 210.5:395.5 : 1

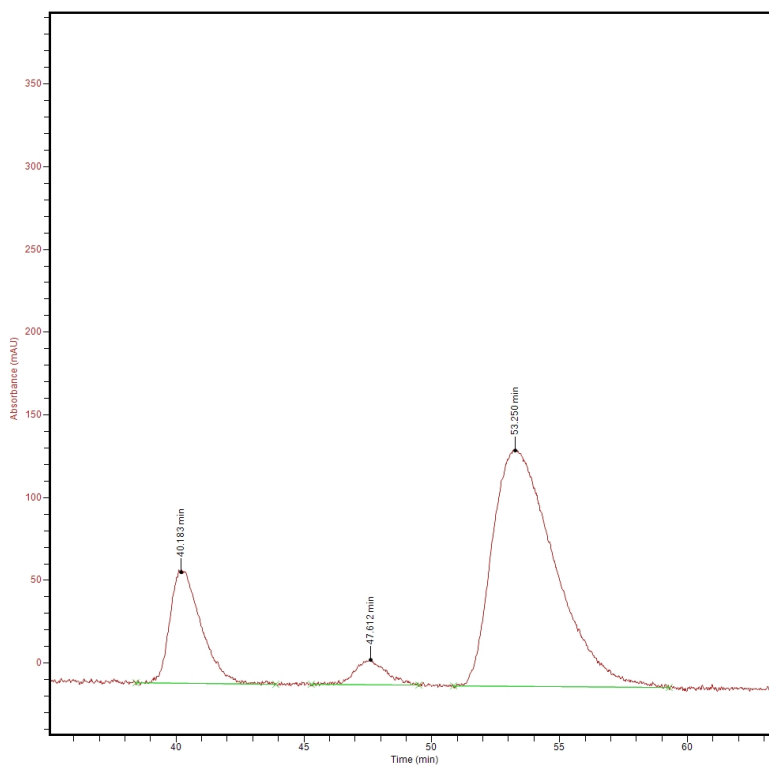

| Ret. Time (min) | Peak Area   | % Total Area |
|-----------------|-------------|--------------|
| 40.183          | 5797356.31  | 19.2         |
| 53.250          | 24301729.12 | 80.7         |
